# Supplementary material for: Electrophilic aromatic substitution using fluorinated isoxazolines at the C5 position via C–F bond cleavage
Source: Royal Society of Chemistry journal article supplement (doi:10.1039/d4ra07102f), 2024-01-01
Supplement: d4ra07102f1.pdf [file d4ra07102f1.pdf]

**Electrophilic aromatic substitution using fluorinated isoxazolines at C5 position via C-F bond cleavage.**

Kazuyuki Sato,<sup>\*1</sup> Tomohiro Kuroki,<sup>1</sup> Haruka Minami,<sup>1</sup> Azusa Sato,<sup>2</sup> Yukiko Karuo,<sup>1</sup> Atsushi Tarui,<sup>1</sup> Kentaro Kawai,<sup>1</sup> Masaaki Omote<sup>\*1</sup>

*1) Faculty of Pharmaceutical Sciences, Setsunan University, 45-1 Nagaotoge-cho, Hirakata, Osaka, 573-0101, Japan*

*2) School of Pharmacy, Tokyo University of Pharmacy and Life Sciences, 1432-1 Horinouchi, Hachioji, Tokyo 192-0392, Japan*

**Electronic Supplementary Information (ESI)**

|                                                                                          |         |
|------------------------------------------------------------------------------------------|---------|
| General Information .....                                                                | S2      |
| Materials .....                                                                          | S2      |
| Experimental Section                                                                     |         |
| General procedure for the synthesis<br>of 4,4,5-trifluoroisoxazolines. ....              | S2      |
| General procedure for S <sub>E</sub> Ar reaction<br>with fluorinated isoxazolines. ....  | S2      |
| Typical procedure for the synthesis of <b>6</b><br>via reductive N-O bond cleavage. .... | S3      |
| Typical procedure for the synthesis of <b>7</b><br>via reductive N-O bond cleavage. .... | S3      |
| Spectroscopic Data .....                                                                 | S4–S9   |
| References .....                                                                         | S9      |
| NMR charts .....                                                                         | S10–S37 |
| X-ray crystallographic data .....                                                        | S38–S40 |

## General Information:

$^1\text{H}$  NMR,  $^{13}\text{C}$  NMR and  $^{19}\text{F}$  NMR spectra were recorded on a JEOL JNM-ECZS-400 spectrometer. Chemical shifts of  $^1\text{H}$  NMR are reported in ppm from tetramethylsilane (TMS: 0 ppm) as an internal standard. Chemical shifts of  $^{13}\text{C}$  NMR are reported in ppm from tetramethylsilane (TMS: 0 ppm) as an internal standard. Chemical shifts of  $^{19}\text{F}$  NMR are reported in ppm from trichlorofluoromethane ( $\text{CFCl}_3$ : 0 ppm) as an internal standard. All data are reported as follows: chemical shifts, relative integration value, multiplicity (s = singlet, d = doublet, t = triplet, q = quartet, br = broad, m = multiplet), coupling constants (Hz). Mass spectra were obtained on JEOL JMS-700T spectrometers. Melting points were measured on Yanagimoto micro melting point apparatus MP-S3. Details of high quality and resolution X-ray diffraction experiments are shown in the section “X-ray crystallographic data”

## Materials:

Sulfolane was distilled before use. Tetrahydrofuran (THF) was distilled over benzophenone ketyl sodium just before use. All commercially available reagents were used without further purification. All experiments were carried out under argon atmosphere in flame-dried glassware using standard inert techniques for introducing reagents and solvents unless otherwise noted. 3,5-Diphenyl-4,4,5-trifluoroisoxazoline (3) was synthesized according to the previous paper and used as a solution of 2.0 M in cyclohexane.<sup>1</sup>

## Experimental Section:

### General procedure for the synthesis of 4,4,5-trifluoroisoxazoles.<sup>1</sup>

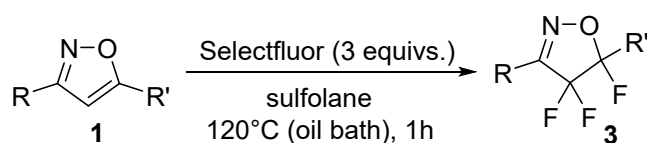

Isoxazole (**1**; 1 mmol) and Selectfluor (3 mmol) were suspended in sulfolane (4 mL) and stirred for 1 h at 120 °C. The resulting mixture was quenched with saturated aqueous  $\text{NaHCO}_3$  and extracted with AcOEt. The AcOEt layer was washed with saturated aqueous NaCl and dried over  $\text{MgSO}_4$ . The solvent was removed in vacuo and the residue was purified by column chromatography to give 4,4,5-trifluorinated isoxazole (**3**).

### General procedure for $\text{S}_{\text{E}}\text{Ar}$ reaction with fluorinated isoxazoles.

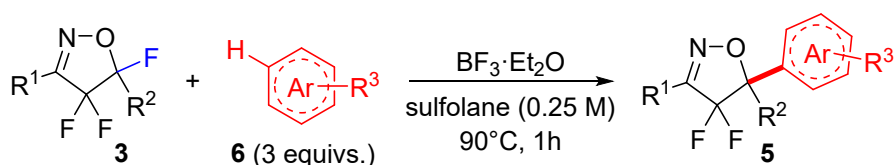

To a solution of 2.0 M 4,4,5-trifluoroisoxazoline (**3**) in cyclohexane (0.5 mL, 1 mmol of **3**) was added sulfolane (3.5 mL) and aromatics (**6**, 3 mmol) followed by  $\text{BF}_3 \cdot \text{Et}_2\text{O}$  (1 mmol) at ambient temperature. The reaction mixture was stirred at  $90^\circ\text{C}$  for 1 h. After that time, the resulting mixture was quenched with saturated aqueous  $\text{NaHCO}_3$  and extracted with AcOEt. The AcOEt layer was washed with saturated aqueous NaCl and dried over  $\text{MgSO}_4$ . The solvent was removed in vacuo and the residue was purified by column chromatography to give 5-arylated 4,4-difluoroisoxazoline (**5**).

#### Typical procedure for the synthesis of **6** via reductive N-O bond cleavage.<sup>2</sup>

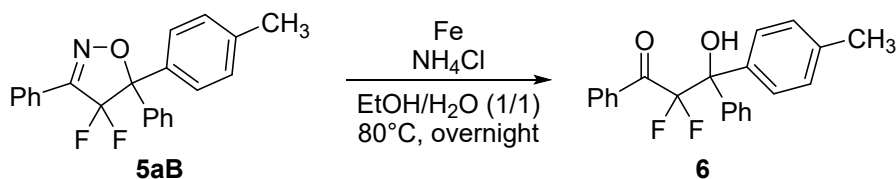

The mixture of **5aB** (141 mg, 0.4 mmol), Fe powder (223 mg, 4 mmol), and  $\text{NH}_4\text{Cl}$  (214 mg, 4 mmol) of EtOH/ $\text{H}_2\text{O}$  (1/1) 20 mL was stirred overnight at  $80^\circ\text{C}$ . After that time, the reaction mixture was filtered through Celite, then the filtrate was diluted with AcOEt and washed with saturated aqueous NaCl. The AcOEt layer was separated and dried over  $\text{MgSO}_4$ . The solvent was removed in vacuo and the residue was purified by column chromatography to give the keto alcohol (**6**, 96 mg, 68%).

#### Typical procedure for the synthesis of **7** via reductive N-O bond cleavage.<sup>3</sup>

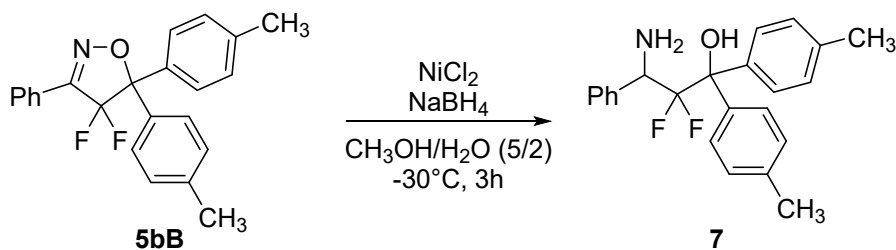

The solution of **5bB** (200 mg, 0.55 mmol) and  $\text{NiCl}_2$  (392 mg, 1.65 mmol) in MeOH (11 mL) and THF (4.4 mL) was cooled to  $-30^\circ\text{C}$  and stirred for 10 min. After that time,  $\text{NaBH}_4$  (209 mg, 5.5 mmol) was added and the mixture was stirred for 3 h under the same temperature. The resulting mixture was quenched with  $\text{H}_2\text{O}$  and extracted with AcOEt. The AcOEt layer was washed with saturated aqueous NaCl and dried over  $\text{MgSO}_4$ . The solvent was removed in vacuo and the residue was purified by column chromatography to give the amino alcohol (**7**, 125 mg, 62%).

## Spectroscopic Data:

### 4,4-Difluoro-3,5-diphenyl-4,5-dihydroisoxazol-5-ol (4a)<sup>1</sup>

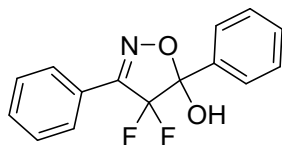

Colorless solid; M.p. 109.0–111.0 °C (recrystallized from hexane–AcOEt); <sup>1</sup>H NMR (400 MHz, CDCl<sub>3</sub>) δ: 3.96 (1H, s), 7.41–7.53 (6H, m), 7.63–7.66 (2H, m), 7.83–7.85 (2H, m); <sup>13</sup>C NMR (100 MHz, CDCl<sub>3</sub>) δ: 103.0 (dd, *J* = 33.1, 19.4 Hz), 124.6 (dd, *J* = 267.8, 255.2 Hz), 124.9 (m), 126.8 (d, *J* = 1.5 Hz), 127.1 (d, *J* = 1.5 Hz), 128.5, 129.1, 130.3, 131.6, 132.7 (d, *J* = 1.4 Hz), 153.7 (dd, *J* = 25.9, 24.9 Hz); <sup>19</sup>F NMR (376 MHz, CDCl<sub>3</sub>) δ: -37.54 (1F, d, *J* = 266.3 Hz), -57.23 (1F, d, *J* = 266.3 Hz); MS *m/z*: 275 (M<sup>+</sup>); HRMS Calcd for C<sub>15</sub>H<sub>11</sub>F<sub>2</sub>NO<sub>2</sub>: 275.076 (M<sup>+</sup>), Found: 275.076; IR (KBr) cm<sup>-1</sup>: 2982, 1450, 1365, 1242, 1127, 1098.

### 4,4-difluoro-3,5-diphenyl-5-(*p*-tolyl)-4,5-dihydroisoxazole (5aB)

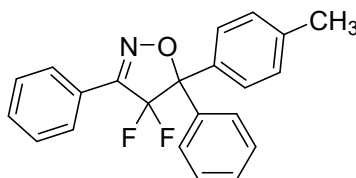

Colorless solid; M.p. 86.5–88.0 °C (recrystallized from hexane); <sup>1</sup>H NMR (400 MHz, CDCl<sub>3</sub>) δ: 2.33 (3H, s), 7.17–7.19 (2H, m), 7.31–7.49 (8H, m), 7.54–7.56 (2H, m), 7.86–7.87 (2H, m); <sup>13</sup>C NMR (100 MHz, CDCl<sub>3</sub>) δ: 21.09, 90.77 (t, *J* = 23.0 Hz), 125.3, 126.8, 127.1, 127.2, 127.2, 128.2 (t, *J* = 260.1 Hz), 128.3, 128.5, 129.0 (d, *J* = 3.3 Hz), 131.2, 132.6 (t, *J* = 2.5 Hz), 135.6 (t, *J* = 2.4 Hz), 138.5, 153.57 (t, *J* = 25.8 Hz); <sup>19</sup>F NMR (376 MHz, CDCl<sub>3</sub>) δ: -97.41 (1F, d, *J* = 258.1 Hz), -98.48 (1F, d, *J* = 258.1 Hz); MS *m/z*: 349 (M<sup>+</sup>); HRMS Calcd for C<sub>22</sub>H<sub>17</sub>F<sub>2</sub>NO: 349.1278 (M<sup>+</sup>), Found: 349.1275.

### 4,4-difluoro-5-(4-methoxyphenyl)-3,5-diphenyl-4,5-dihydroisoxazole (5aC)

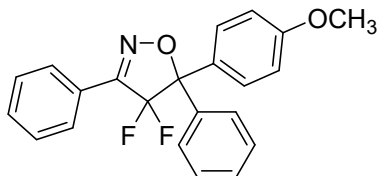

Colorless solid; M.p. 77.0–79.0 °C (recrystallized from hexane); <sup>1</sup>H NMR (400 MHz, CDCl<sub>3</sub>) δ: 3.79 (3H, s), 6.87–6.91 (2H, m), 7.32–7.47 (8H, m), 7.54–7.56 (2H, m), 7.85–7.87 (2H, m); <sup>13</sup>C NMR (100 MHz, CDCl<sub>3</sub>) δ: 55.26, 90.7 (t, *J* = 23.2 Hz), 113.7, 125.3, 126.8, 127.20 (d, *J* = 1.6 Hz), 127.6 (t, *J* = 3.0 Hz), 128.2 (t, *J* = 259.9 Hz), 128.3, 128.5, 128.7 (d, *J* = 1.4 Hz), 129.0, 131.2, 135.7, 153.6 (t, *J* = 25.9 Hz), 159.7; <sup>19</sup>F NMR (376 MHz, CDCl<sub>3</sub>) δ: -96.99 (1F, d, *J* = 258.0 Hz), -98.78 (1F, d, *J* = 258.0 Hz); MS *m/z*: 365 (M<sup>+</sup>); HRMS Calcd for C<sub>22</sub>H<sub>17</sub>F<sub>2</sub>NO<sub>2</sub>: 365.1227 (M<sup>+</sup>), Found: 365.1230.

#### 4-(4,4-difluoro-3,5-diphenyl-4,5-dihydroisoxazol-5-yl)-*N,N*-dimethylaniline (5aD)

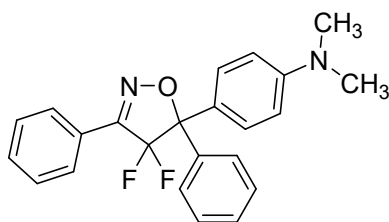

Yellowish solid; M.p. 130.0–131.5 °C;  $^1\text{H}$  NMR (400 MHz,  $\text{CDCl}_3$ )  $\delta$ : 2.93 (6H, s), 6.65–6.69 (2H, m), 7.33–7.49 (8H, m), 7.55–7.58 (2H, m), 7.86–7.88 (2H, m);  $^{13}\text{C}$  NMR (100 MHz,  $\text{CDCl}_3$ )  $\delta$ : 40.25, 91.09 (t,  $J = 23.0$  Hz), 111.7, 122.8 (t,  $J = 2.6$  Hz), 125.5, 126.8, 128.1, 127.3 (d,  $J = 1.6$  Hz), 128.2 (t,  $J = 259.3$  Hz), 128.3, 128.3, 128.9, 131.0, 135.9, 150.3, 153.5 (t,  $J = 26.0$  Hz);  $^{19}\text{F}$  NMR (376 MHz,  $\text{CDCl}_3$ )  $\delta$ : -96.18 (1F, d,  $J = 257.8$  Hz), -99.64 (1F, d,  $J = 257.8$  Hz); MS  $m/z$ : 378 ( $\text{M}^+$ ); HRMS Calcd for  $\text{C}_{23}\text{H}_{20}\text{F}_2\text{N}_2\text{O}$ : 378.1544 ( $\text{M}^+$ ), Found: 378.1542.

#### 5-(3,4-dimethylphenyl)-4,4-difluoro-3,5-diphenyl-4,5-dihydroisoxazole (5aH)

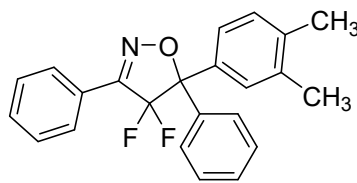

Colorless solid; M.p. 102.0–105.0 °C (recrystallized from hexane);  $^1\text{H}$  NMR (400 MHz,  $\text{CDCl}_3$ )  $\delta$ : 2.24 (3H, s), 2.26 (3H, s), 7.14 (1H, d,  $J = 7.9$  Hz), 7.17–7.49 (8H, m), 7.54–7.56 (2H, m), 7.85–7.87 (2H, m);  $^{13}\text{C}$  NMR (100 MHz,  $\text{CDCl}_3$ )  $\delta$ : 19.45, 20.03, 90.74 (t,  $J = 23.1$  Hz), 124.6, 125.3, 126.8, 127.2, 128.2 (t,  $J = 260.1$  Hz), 128.2, 128.3, 128.4, 129.0, 129.5, 131.2, 132.9 (t,  $J = 2.4$  Hz), 135.8 (t,  $J = 2.4$  Hz), 136.6, 137.2, 153.6 (t,  $J = 25.9$  Hz);  $^{19}\text{F}$  NMR (376 MHz,  $\text{CDCl}_3$ )  $\delta$ : -97.92 (2F, s); MS  $m/z$ : 363 ( $\text{M}^+$ ); HRMS Calcd for  $\text{C}_{23}\text{H}_{19}\text{F}_2\text{NO}$ : 363.1435 ( $\text{M}^+$ ), Found: 363.1439.

#### 5-(2,4-dimethylphenyl)-4,4-difluoro-3,5-diphenyl-4,5-dihydroisoxazole (5aI)

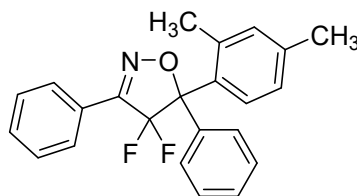

Colorless solid; M.p. 148.5–150.5 °C (recrystallized from hexane–AcOEt);  $^1\text{H}$  NMR (400 MHz,  $\text{CDCl}_3$ )  $\delta$ : 2.20 (3H, s), 2.36 (3H, s), 7.07 (1H, m), 7.13 (1H, m), 7.26–7.30 (5H, m), 7.43–7.51 (3H, m), 7.73 (1H, m), 7.88–7.90 (2H, m);  $^{13}\text{C}$  NMR (100 MHz,  $\text{CDCl}_3$ )  $\delta$ : 20.98, 21.46, 92.52 (t,  $J = 22.9$  Hz), 125.3 (d,  $J = 1.5$  Hz), 126.2, 126.8 (d,  $J = 0.6$  Hz), 127.1 (d,  $J = 3.7$  Hz), 127.9 (d,  $J = 1.5$  Hz), 128.2, 128.7, 128.8 (dd,  $J = 261.8, 258.4$  Hz), 129.0, 130.0 (d,

$J = 3.5$  Hz), 131.1, 133.0, 136.1 (d,  $J = 4.1$  Hz), 137.6, 138.5, 153.4 (t,  $J = 26.1$  Hz);  $^{19}\text{F}$  NMR (376 MHz,  $\text{CDCl}_3$ )  $\delta$ : -88.58 (1F, d,  $J = 260.6$  Hz), -106.3 (1F, d,  $J = 260.6$  Hz); MS  $m/z$ : 363 ( $\text{M}^+$ ); HRMS Calcd for  $\text{C}_{23}\text{H}_{19}\text{F}_2\text{NO}$ : 363.1435 ( $\text{M}^+$ ), Found: 363.1432.

#### 4,4-difluoro-5-(1-methyl-1H-pyrrol-2-yl)-3,5-diphenyl-4,5-dihydroisoxazole (5aJ)

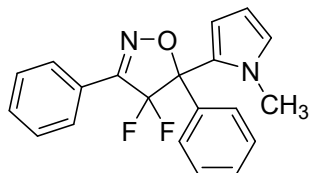

Pale yellow solid; M.p. 93.0–95.5 °C (recrystallized from hexane);  $^1\text{H}$  NMR (400 MHz,  $\text{CDCl}_3$ )  $\delta$ : 3.33 (3H, s), 6.10 (1H, m), 6.58 (1H, m), 6.65 (1H, m), 7.33–7.38 (5H, m), 7.42–7.51 (3H, m), 7.84–7.86 (2H, m);  $^{13}\text{C}$  NMR (100 MHz,  $\text{CDCl}_3$ )  $\delta$ : 35.95, 88.75 (dd,  $J = 25.2$ , 21.2 Hz), 106.6 (d,  $J = 1.2$  Hz), 111.9 (d,  $J = 11.9$  Hz), 125.0 (d,  $J = 3.4$  Hz), 125.2, 125.8, 126.8, 127.5 (d,  $J = 1.0$  Hz), 127.8 (dd,  $J = 264.9$ , 257.3 Hz), 128.4, 128.9, 129.0, 131.2, 134.4 (m), 153.7 (t,  $J = 25.4$  Hz);  $^{19}\text{F}$  NMR (376 MHz,  $\text{CDCl}_3$ )  $\delta$ : -97.98 (1F, d,  $J = 259.2$  Hz), -103.9 (1F, dd,  $J = 259.2$ , 5.2 Hz); MS  $m/z$ : 338 ( $\text{M}^+$ ); HRMS Calcd for  $\text{C}_{20}\text{H}_{16}\text{F}_2\text{N}_2\text{O}$ : 338.1231 ( $\text{M}^+$ ), Found: 338.1233.

#### 4,4-difluoro-5-(1-methyl-1H-pyrrol-3-yl)-3,5-diphenyl-4,5-dihydroisoxazole (5aJ')

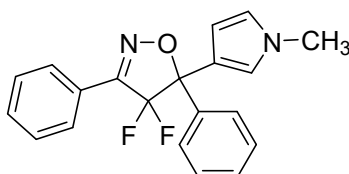

Pale yellow oil;  $^1\text{H}$  NMR (400 MHz,  $\text{CDCl}_3$ )  $\delta$ : 3.56 (3H, s), 6.13 (1H, m), 6.52–6.55 (2H, m), 7.34–7.48 (6H, m), 7.61–7.63 (2H, m), 7.86–7.89 (2H, m);  $^{13}\text{C}$  NMR (100 MHz,  $\text{CDCl}_3$ )  $\delta$ : 36.29, 89.19 (t,  $J = 23.0$  Hz), 108.8 (d,  $J = 3.3$  Hz), 119.7 (t,  $J = 3.6$  Hz), 122.2, 122.4 (d,  $J = 2.9$  Hz), 125.7 (m), 126.7, 127.0 (d,  $J = 1.0$  Hz), 127.4 (dd,  $J = 260.1$ , 256.8 Hz), 128.0, 128.3, 128.9, 130.9, 135.4 (m), 153.3 (t,  $J = 25.9$  Hz);  $^{19}\text{F}$  NMR (376 MHz,  $\text{CDCl}_3$ )  $\delta$ : -95.14 (1F, d,  $J = 258.2$  Hz), -104.1 (1F, d,  $J = 258.2$  Hz); MS  $m/z$ : 338 ( $\text{M}^+$ ); HRMS Calcd for  $\text{C}_{20}\text{H}_{16}\text{F}_2\text{N}_2\text{O}$ : 338.1231 ( $\text{M}^+$ ), Found: 338.1232.

#### 4,4-difluoro-5-(furan-2-yl)-3,5-diphenyl-4,5-dihydroisoxazole (5aK)

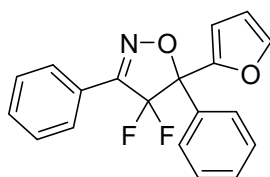

Pale yellow solid; M.p. 61.0–65.0 °C;  $^1\text{H}$  NMR (400 MHz,  $\text{CDCl}_3$ )  $\delta$ : 6.30–6.32 (2H, m), 7.40–7.51 (7H, m), 7.64–7.66 (2H, m), 7.87–7.90 (2H, m);  $^{13}\text{C}$  NMR (100 MHz,  $\text{CDCl}_3$ )  $\delta$ : 87.26 (dd,  $J = 26.7$ , 22.7 Hz), 110.1, 111.9, 125.1, 126.8, 127.4 (dd,  $J = 261.9$ , 258.0 Hz),

127.9 (d,  $J = 11.7$  Hz), 128.3, 129.0, 129.2, 131.3, 132.1 (d,  $J = 3.9$  Hz), 144.2, 149.3 (m), 153.0 (t,  $J = 25.5$  Hz);  $^{19}\text{F}$  NMR (376 MHz,  $\text{CDCl}_3$ )  $\delta$ : -90.86 (1F, d,  $J = 261.3$  Hz), -106.1 (1F, d,  $J = 261.3$  Hz); MS  $m/z$ : 325 ( $\text{M}^+$ ); HRMS Calcd for  $\text{C}_{19}\text{H}_{13}\text{F}_2\text{NO}_2$ : 325.0914 ( $\text{M}^+$ ), Found: 325.0916.

#### 4,4-difluoro-3,5-diphenyl-5-(thiophen-2-yl)-4,5-dihydroisoxazole (5aL)

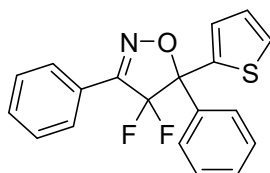

Colorless solid; M.p. 65.5–66.5 °C (recrystallized from hexane);  $^1\text{H}$  NMR (400 MHz,  $\text{CDCl}_3$ )  $\delta$ : 6.98 (1H, dd,  $J = 5.1, 3.8$  Hz), 7.15 (1H, m), 7.33 (1H, dd,  $J = 5.1, 1.2$  Hz), 7.39–7.52 (6H, m), 7.64–7.67 (2H, m), 7.86–7.88 (2H, m);  $^{13}\text{C}$  NMR (100 MHz,  $\text{CDCl}_3$ )  $\delta$ : 89.30 (dd,  $J = 25.8, 22.4$  Hz), 125.1, 126.8, 126.8, 126.9, 127.0, 127.3 (dd,  $J = 262.0, 259.4$  Hz), 128.3, 128.4, 128.4, 129.0, 131.4, 134.5 (d,  $J = 3.1$  Hz), 139.4 (m), 153.6 (t,  $J = 25.7$  Hz);  $^{19}\text{F}$  NMR (376 MHz,  $\text{CDCl}_3$ )  $\delta$ : -93.54 (1F, d,  $J = 258.0$  Hz), -103.93 (1F, d,  $J = 258.0$  Hz); MS  $m/z$ : 341 ( $\text{M}^+$ ); HRMS Calcd for  $\text{C}_{19}\text{H}_{13}\text{F}_2\text{NOS}$ : 341.0686 ( $\text{M}^+$ ), Found: 341.0687.

#### 4,4-difluoro-3-phenyl-5,5-di-*p*-tolyl-4,5-dihydroisoxazole (5bB)

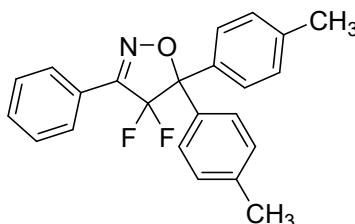

Pale yellow oil;  $^1\text{H}$  NMR (400 MHz,  $\text{CDCl}_3$ )  $\delta$ : 2.33 (6H, s), 7.15–7.18 (4H, m), 7.40–7.48 (7H, m), 7.85–7.89 (2H, m);  $^{13}\text{C}$  NMR (100 MHz,  $\text{CDCl}_3$ )  $\delta$ : 21.08, 90.80 (t,  $J = 23.1$  Hz), 125.3 (m), 126.8, 127.1, 128.2 (t,  $J = 259.8$  Hz), 129.0, 129.0, 131.1, 132.7 (t,  $J = 2.4$  Hz), 138.4, 153.5 (t,  $J = 25.8$  Hz);  $^{19}\text{F}$  NMR (376 MHz,  $\text{CDCl}_3$ )  $\delta$ : -98.03 (2F, s); MS  $m/z$ : 363 ( $\text{M}^+$ ); HRMS Calcd for  $\text{C}_{23}\text{H}_{19}\text{F}_2\text{NO}$ : 363.1435 ( $\text{M}^+$ ), Found: 363.1432.

#### 3,5-bis(4-chlorophenyl)-4,4-difluoro-5-(*p*-tolyl)-4,5-dihydroisoxazole (5cB)

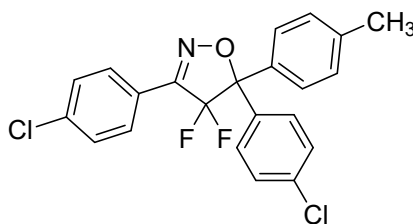

Colorless oil;  $^1\text{H}$  NMR (400 MHz,  $\text{CDCl}_3$ )  $\delta$ : 2.34 (3H, s), 7.19–7.21 (2H, m), 7.34–7.39 (4H, m), 7.42–7.48 (4H, m), 7.78–7.80 (2H, m);  $^{13}\text{C}$  NMR (100 MHz,  $\text{CDCl}_3$ )  $\delta$ : 21.11, 90.55 (t,  $J = 23.5$  Hz), 123.5, 127.0, 127.9 (t,  $J = 260.1$  Hz), 128.0, 128.6, 128.6, 129.2, 129.4, 131.1

(m), 134.0 (m), 134.7, 137.6, 138.9, 152.8 (t,  $J = 26.3$  Hz);  $^{19}\text{F}$  NMR (376 MHz,  $\text{CDCl}_3$ )  $\delta$ : -97.48 (1F, d,  $J = 258.2$  Hz), -98.40 (1F, d,  $J = 258.2$  Hz); MS  $m/z$ : 417 ( $\text{M}^+$ ); HRMS Calcd for  $\text{C}_{22}\text{H}_{15}\text{Cl}_2\text{F}_2\text{NO}$ : 417.0499 ( $\text{M}^+$ ), Found: 417.0499.

#### 4,4-difluoro-3-methyl-5-phenyl-5-(*p*-tolyl)-4,5-dihydroisoxazole (5dB)

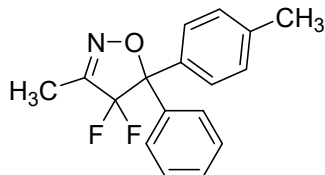

Pale yellow oil;  $^1\text{H}$  NMR (400 MHz,  $\text{CDCl}_3$ )  $\delta$ : 2.11 (3H, t,  $J = 1.5$  Hz), 2.33 (3H, s), 7.16–7.18 (2H, m), 7.30–7.39 (5H, m), 7.49–7.51 (2H, m);  $^{13}\text{C}$  NMR (100 MHz,  $\text{CDCl}_3$ )  $\delta$ : 8.56, 21.08, 88.83 (t,  $J = 22.4$  Hz), 127.7 (t,  $J = 258.5$  Hz), 127.0 (m), 127.0 (m), 128.2, 128.3, 129.0, 132.8 (t,  $J = 2.7$  Hz), 135.8 (t,  $J = 2.5$  Hz), 138.3, 152.9 (t,  $J = 27.9$  Hz);  $^{19}\text{F}$  NMR (376 MHz,  $\text{CDCl}_3$ )  $\delta$ : -102.5 (dq,  $J = 258.9$ , 1.5 Hz), -103.6 (dq,  $J = 258.9$ , 1.6 Hz); MS  $m/z$ : 287 ( $\text{M}^+$ ); HRMS Calcd for  $\text{C}_{17}\text{H}_{15}\text{F}_2\text{NO}$ : 287.1122 ( $\text{M}^+$ ), Found: 287.1123.

#### 2,2-difluoro-3-hydroxy-1,3-diphenyl-3-(*p*-tolyl)propan-1-one (6)

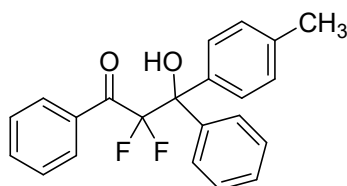

Pale yellow oil;  $^1\text{H}$  NMR (400 MHz,  $\text{CDCl}_3$ )  $\delta$ : 2.33 (3H, s), 4.27 (1H, s), 7.12–7.14 (2H, m), 7.28–7.37 (5H, m), 7.45–7.49 (4H, m), 7.62–7.67 (1H, m), 8.00–8.03 (2H, m);  $^{13}\text{C}$  NMR (100 MHz,  $\text{CDCl}_3$ )  $\delta$ : 21.07, 80.25 (t,  $J = 23.0$  Hz), 115.5 (t,  $J = 264.9$  Hz), 127.4, 127.6, 127.9, 128.0, 128.7, 128.8, 130.3 (t,  $J = 3.1$  Hz), 132.6 (t,  $J = 2.7$  Hz), 134.7, 137.8, 137.9, 140.8, 191.9 (t,  $J = 31.6$  Hz);  $^{19}\text{F}$  NMR (376 MHz,  $\text{CDCl}_3$ )  $\delta$ : -101.5 (2F, s); MS  $m/z$ : 352 ( $\text{M}^+$ ); HRMS Calcd for  $\text{C}_{22}\text{H}_{18}\text{F}_2\text{O}_2$ : 352.1275 ( $\text{M}^+$ ), Found: 352.1278.

#### 3-amino-2,2-difluoro-3-phenyl-1,1-di-*p*-tolylpropan-1-ol (7)

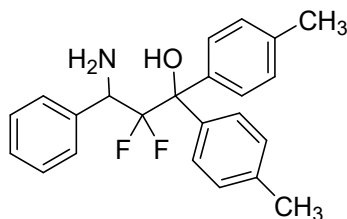

Colorless solid; M.p. 181.5–188.0 °C;  $^1\text{H}$  NMR (400 MHz,  $\text{CDCl}_3$ )  $\delta$ : 2.28 (3H, s), 2.39 (3H, s), 4.36 (1H, d,  $J = 26.5$  Hz), 7.06–7.08 (2H, m), 7.23–7.29 (4H, m), 7.31–7.37 (3H, m), 7.45–7.47 (2H, m), 7.69–7.71 (2H, m);  $^{13}\text{C}$  NMR (100 MHz,  $\text{CDCl}_3$ )  $\delta$ : 20.98, 21.06, 58.15 (dd,  $J = 23.0$ , 31.7 Hz), 81.27 (t,  $J = 24.3$  Hz), 120.7 (dd,  $J = 255.3$ , 260.5 Hz), 127.0 (d,  $J =$



4.5 Hz), 127.8, 128.0, 128.3, 128.4, 128.6, 129.1, 137.0, 137.3, 137.8, 138.4, 140.6 (m);  $^{19}\text{F}$  NMR (376 MHz,  $\text{CDCl}_3$ )  $\delta$ : -100.6 (1F, d,  $J = 265.0$  Hz), -124.0 (1F, dd,  $J = 26.5, 265.0$  Hz); MS  $m/z$ : 367 ( $\text{M}^+$ ); HRMS Calcd for  $\text{C}_{23}\text{H}_{23}\text{F}_2\text{NO}$ : 367.1748 ( $\text{M}^+$ ), Found: 367.1747.

### References:

- [1] Sato, K.; Sandford, G.; Shimizu, K.; Akiyama, S.; Lancashire, M. J.; Yufit, D. S.; Tarui, A.; Omote, M.; Kumadaki, I.; Harusawa, S.; Ando, A. *Tetrahedron* **2016**, *72*, 1690–1698.
- [2] Wang, L.; Zhang, K.; Wang, Y.; Li, W.; Chen, M.; Zhang, J. *Angew. Chem., Int. Ed.* **2020**, *59*, 4421–4427.
- [3] Li, X.-T.; Gu, Q.-.; Dong, X.-Y.; Meng, X.; Liu, X.-Y. *Angew. Chem., Int. Ed.* **2018**, *57*, 7668–7672.

## NMR charts:

### <sup>1</sup>H NMR of 5aB

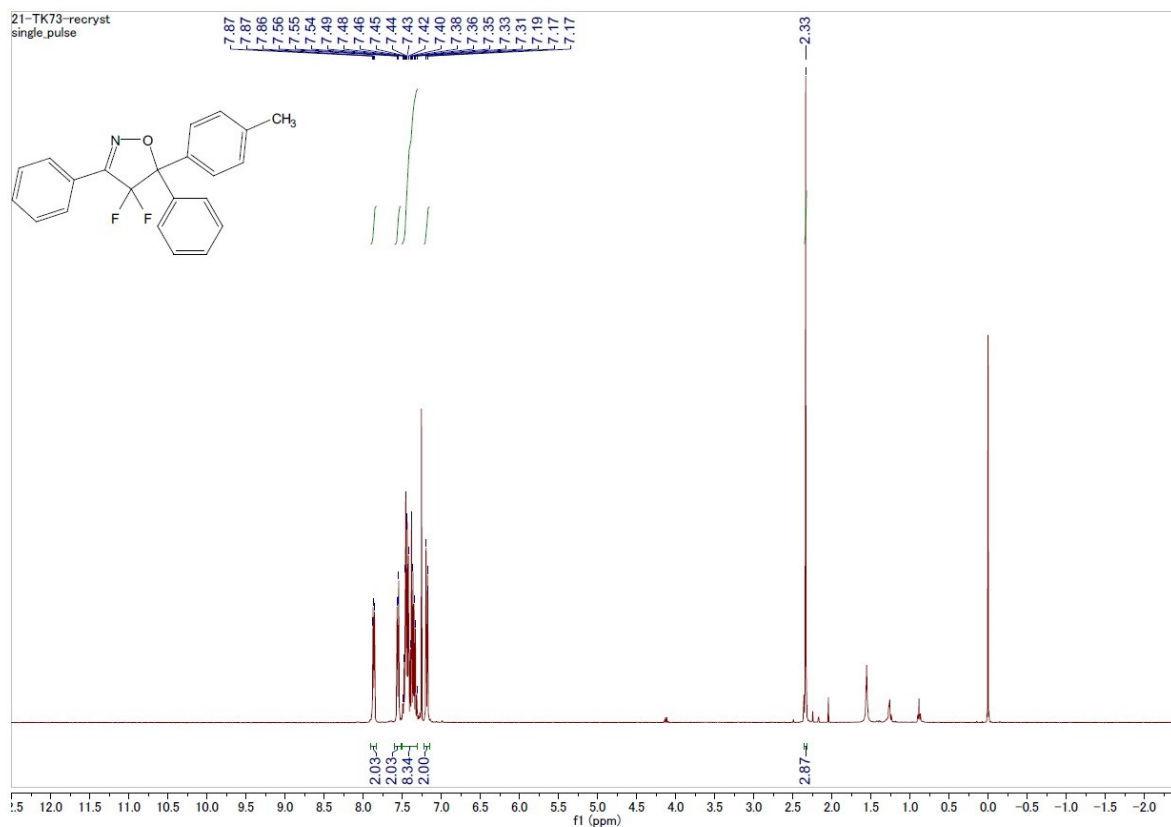

### <sup>19</sup>F NMR of 5aB

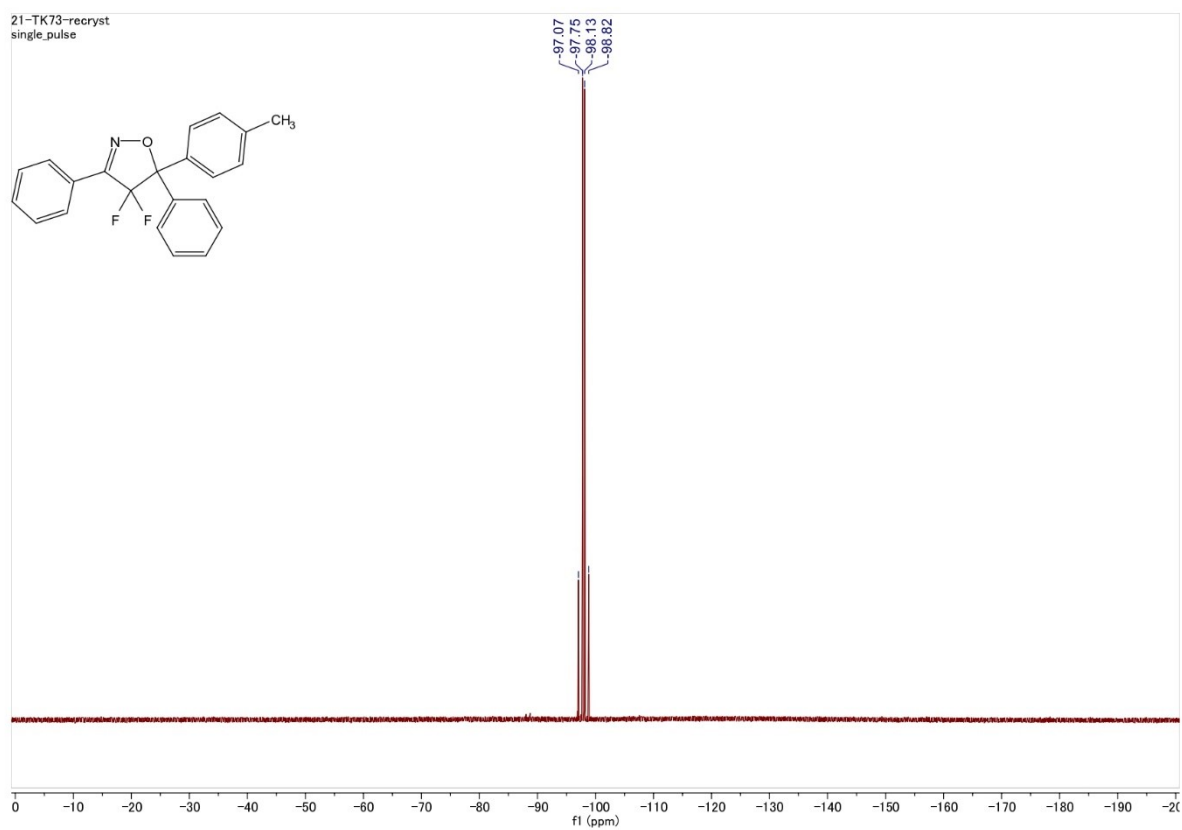

### <sup>13</sup>C NMR of 5aB

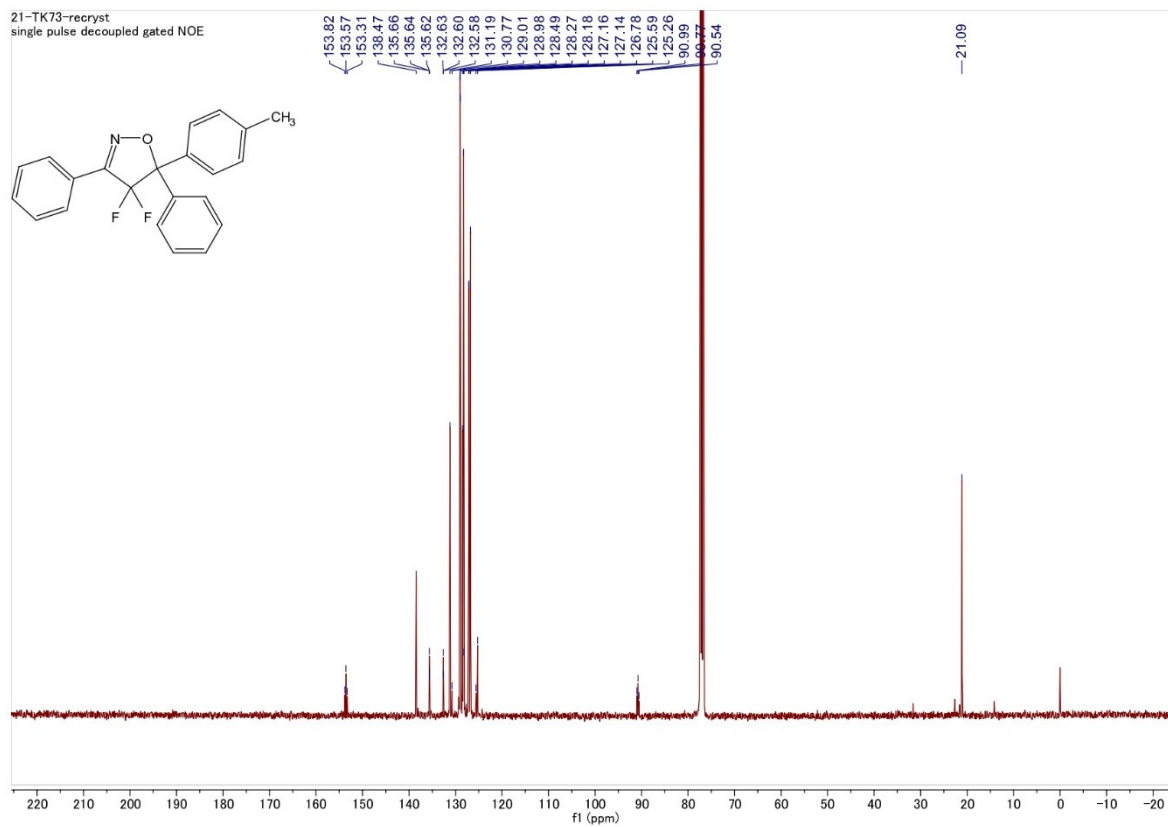

### DEPT135 of 5aB

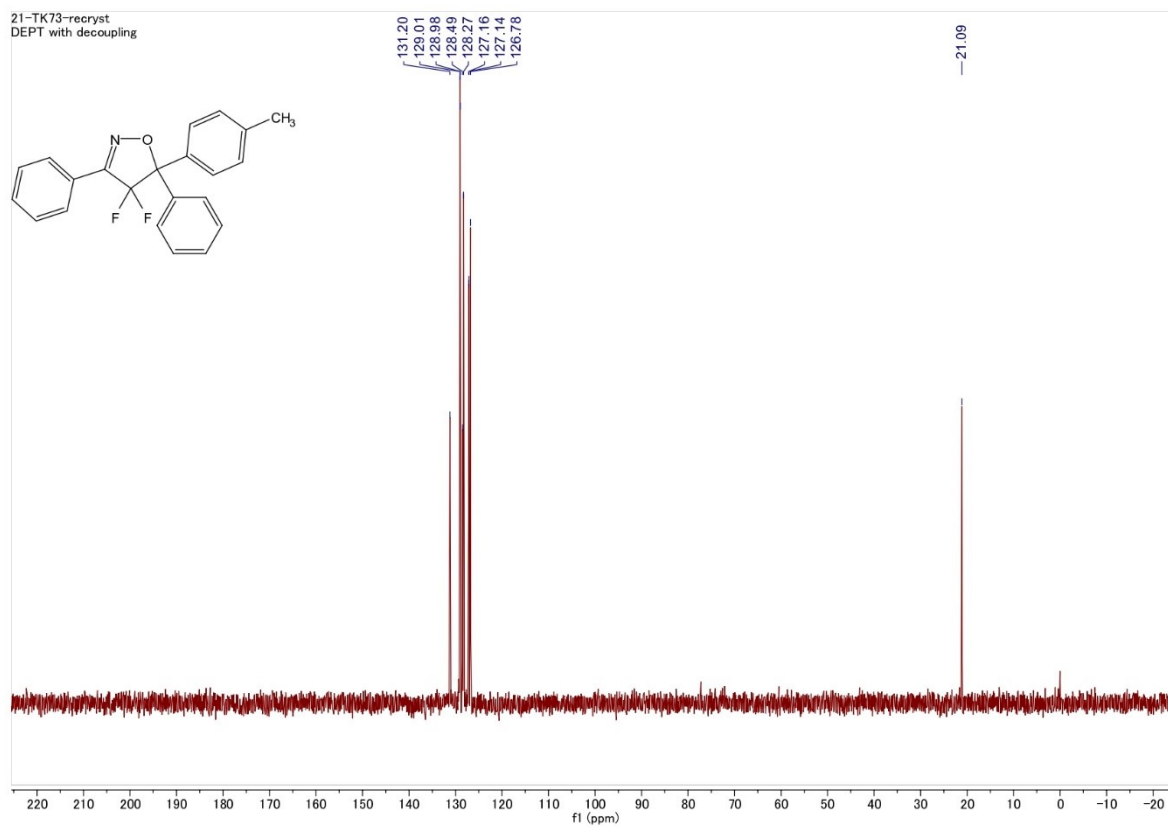

# <sup>1</sup>H NMR of 5aC

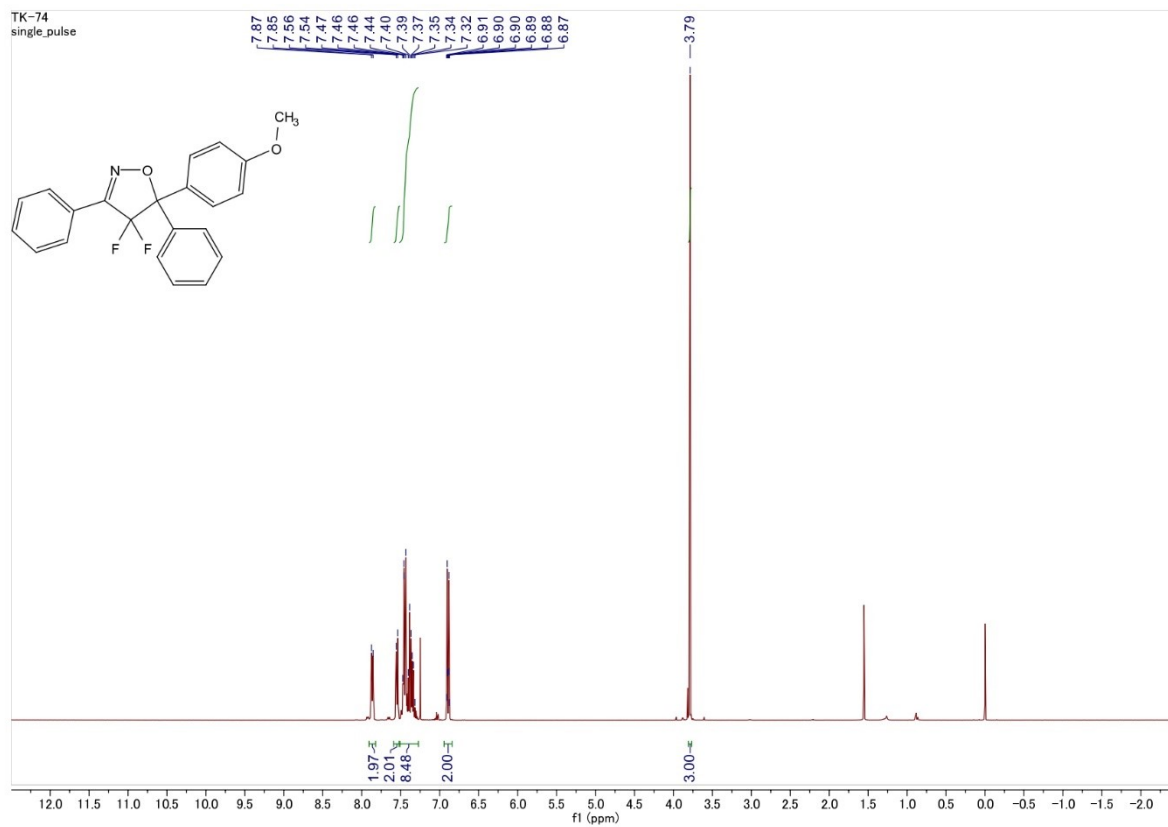

# <sup>19</sup>F NMR of 5aC

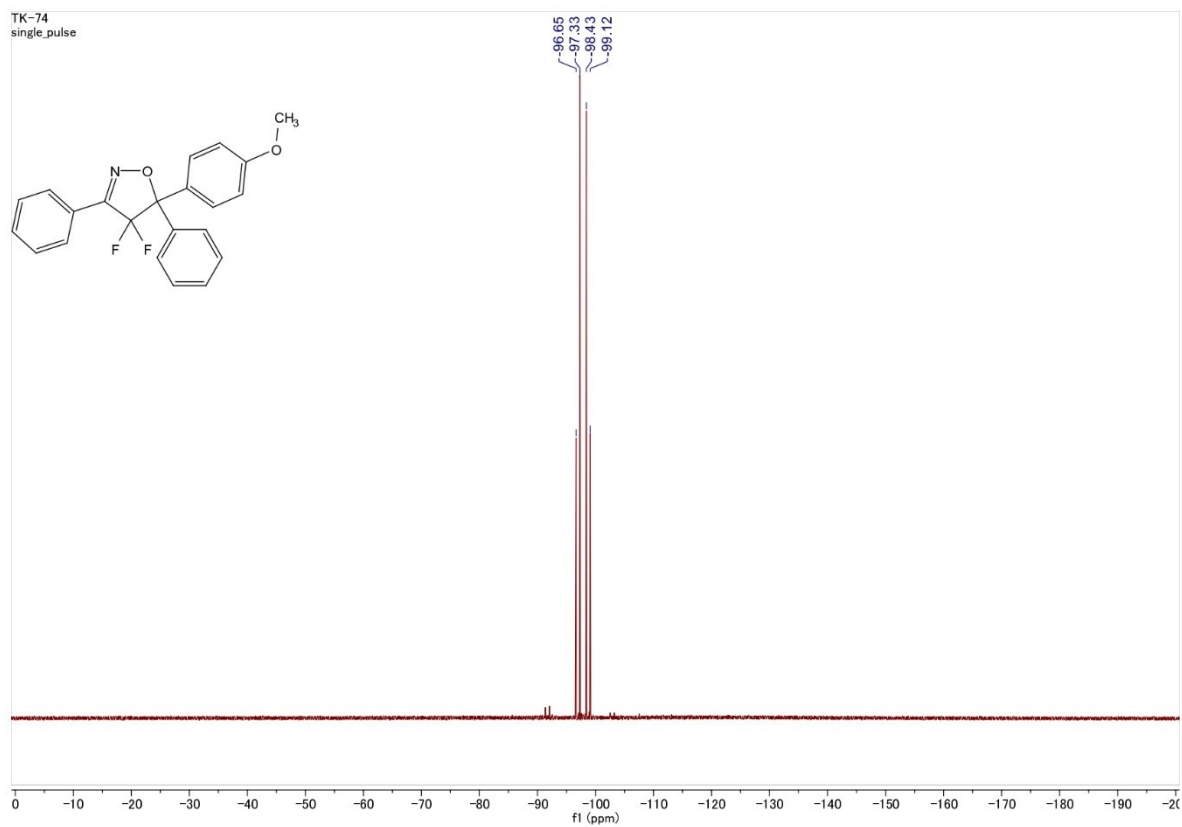

### $^{13}\text{C}$ NMR of 5aC

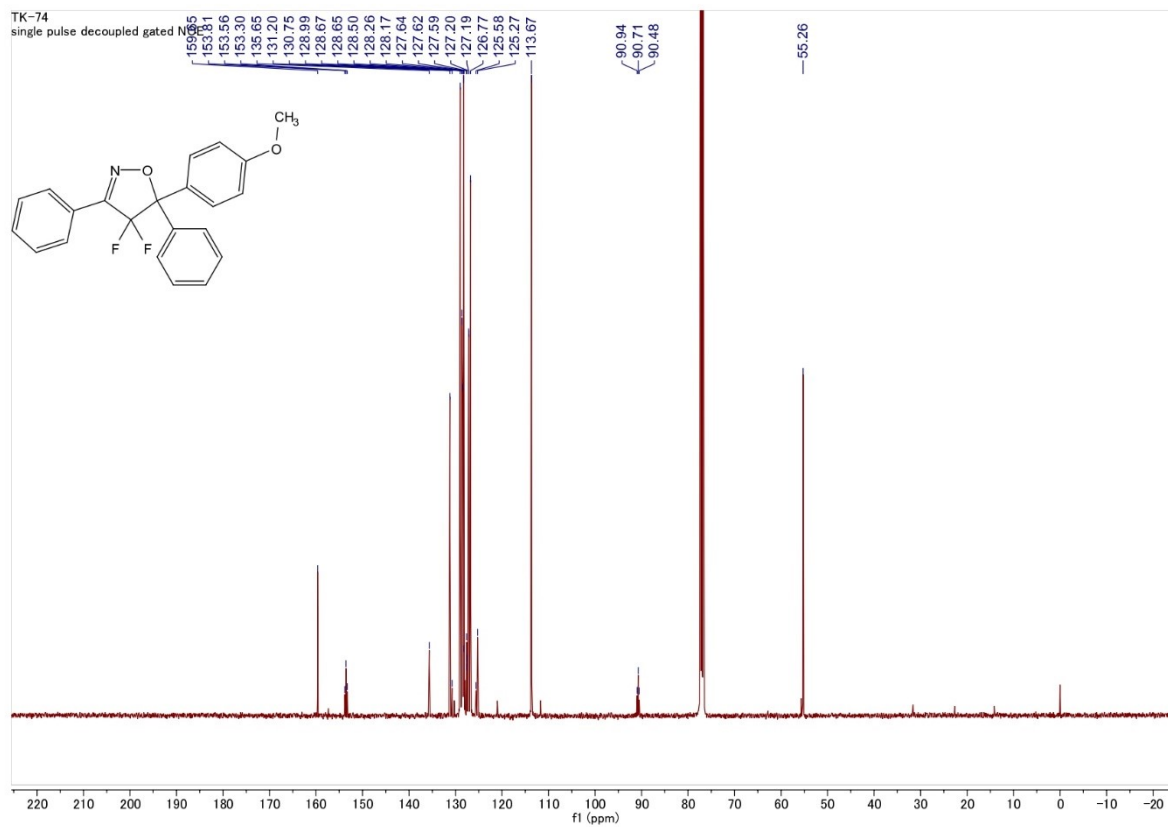

### DEPT135 of 5aC

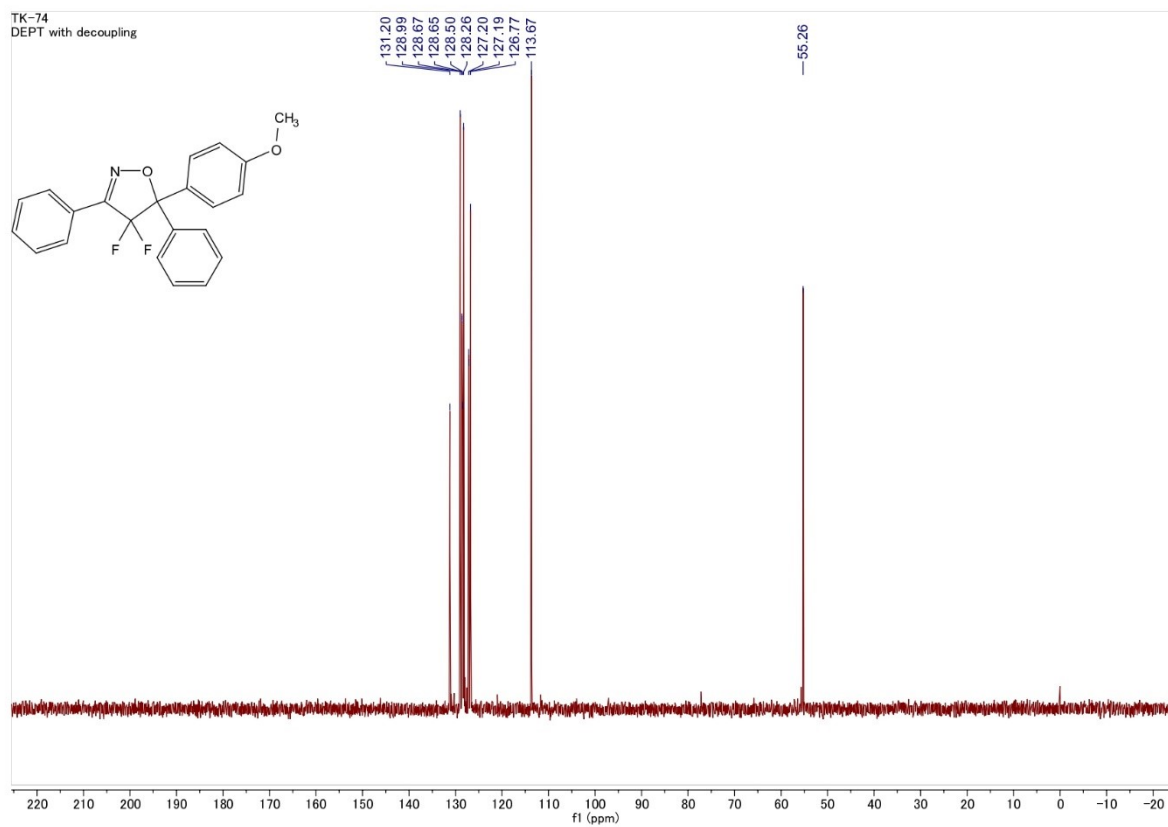

# <sup>1</sup>H NMR of 5aD

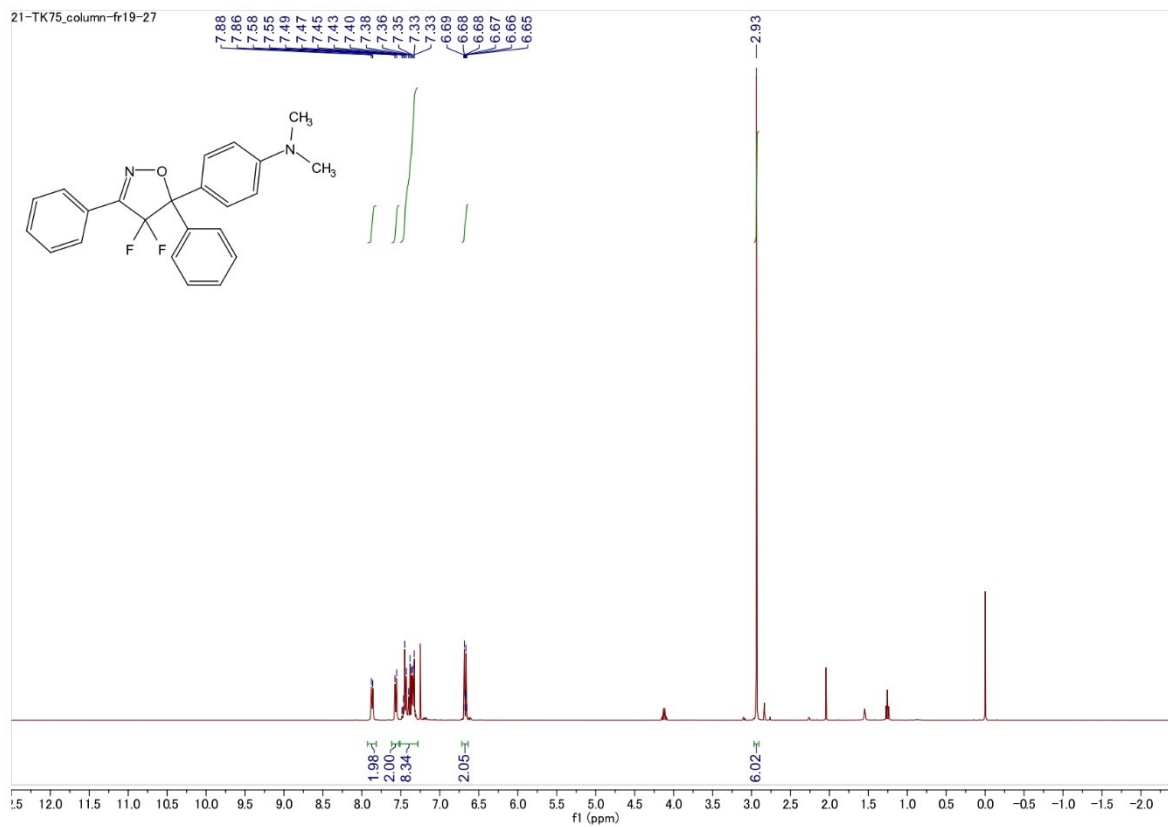

# <sup>19</sup>F NMR of 5aD

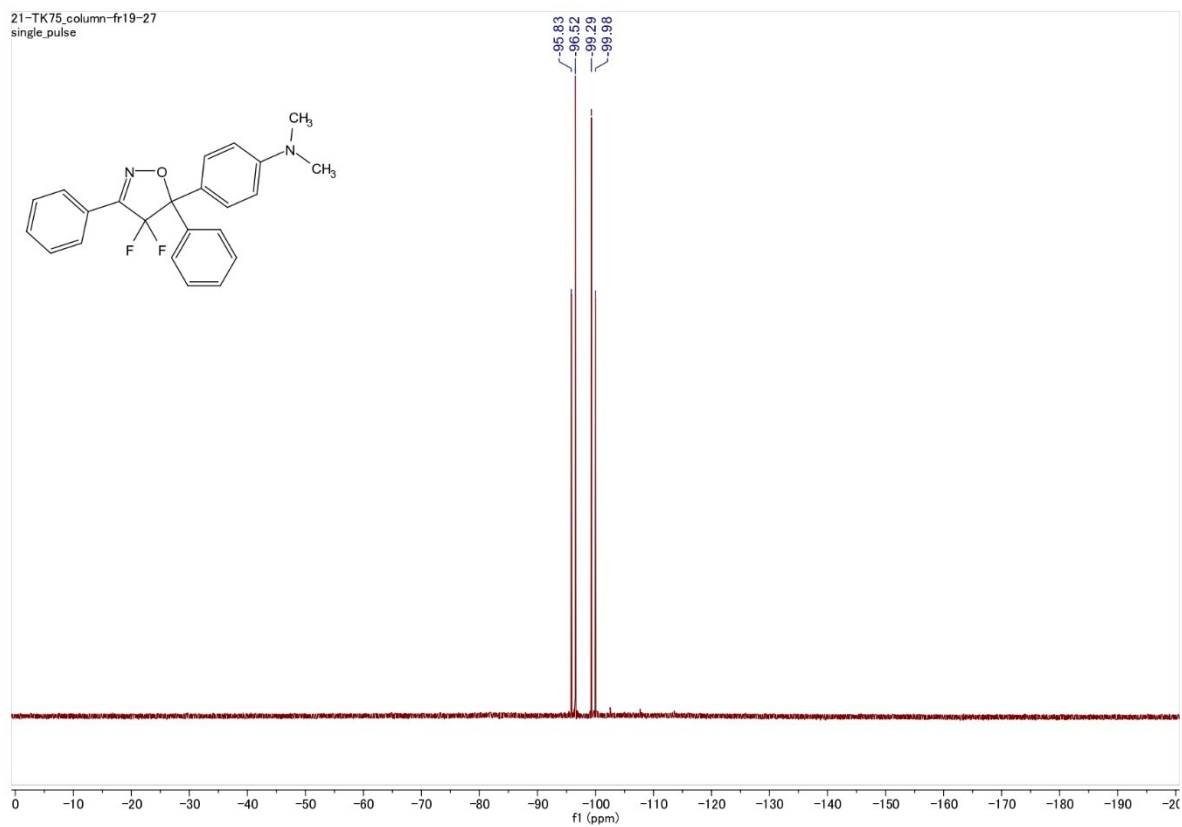

### <sup>13</sup>C NMR of **5aD**

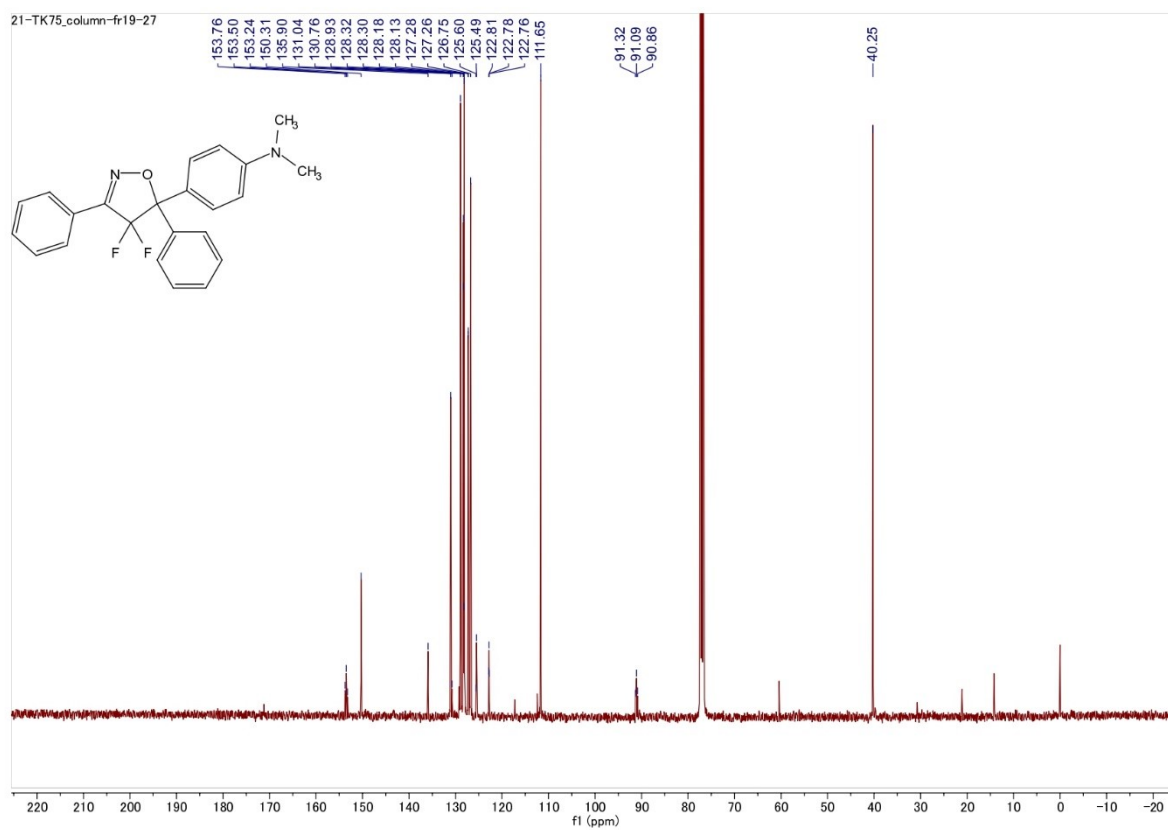

### DEPT135 of **5aD**

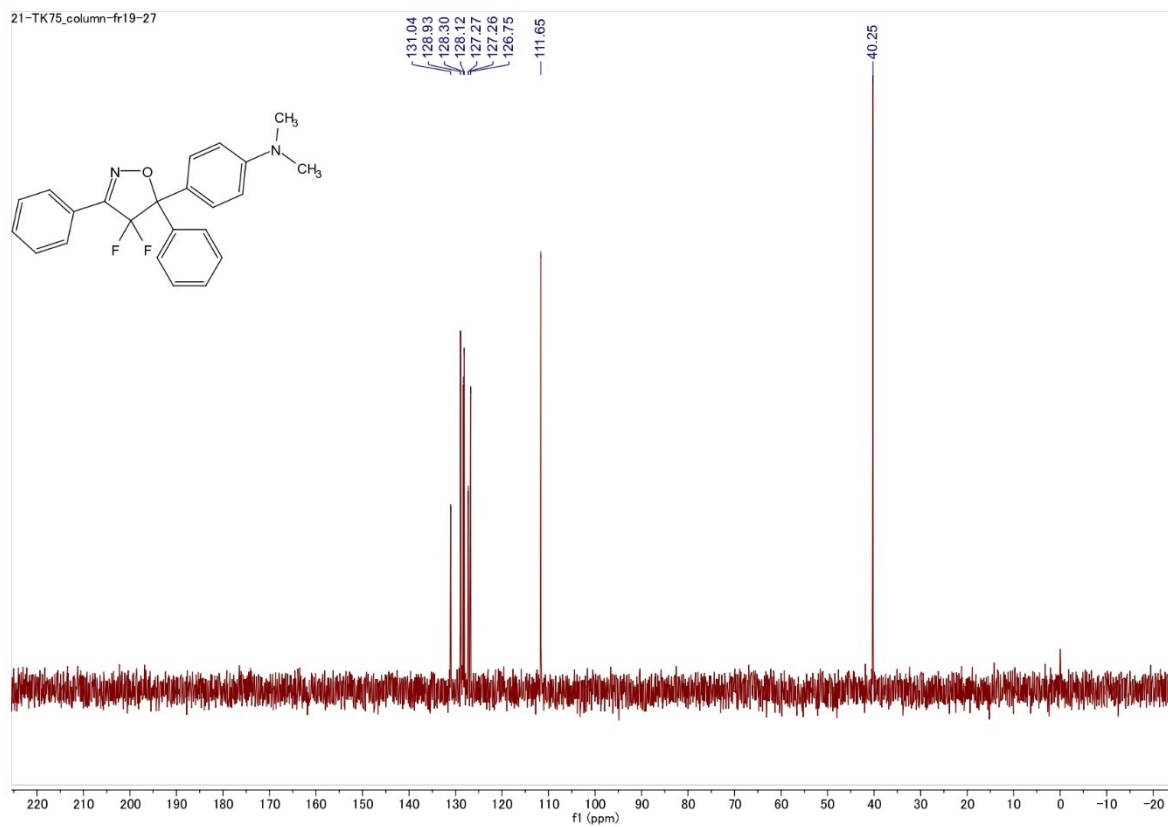

# <sup>1</sup>H NMR of 5aH

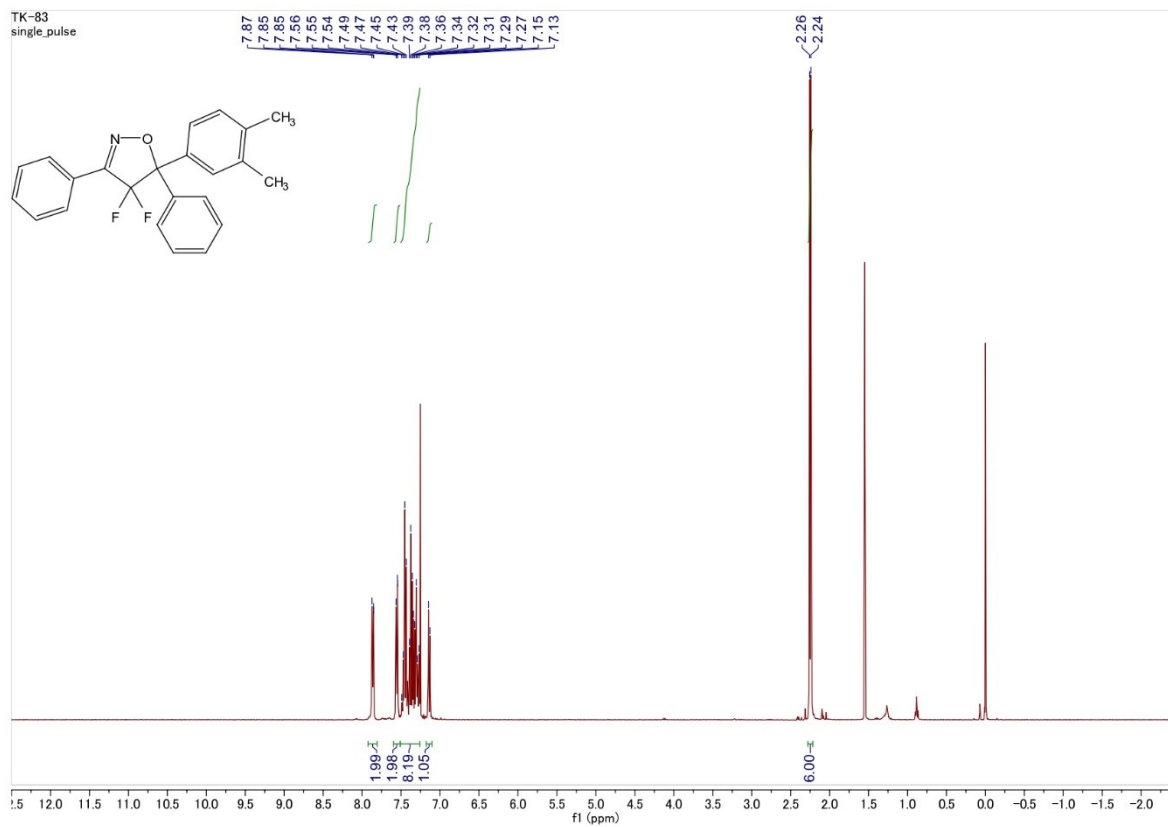

# <sup>19</sup>F NMR of 5aH

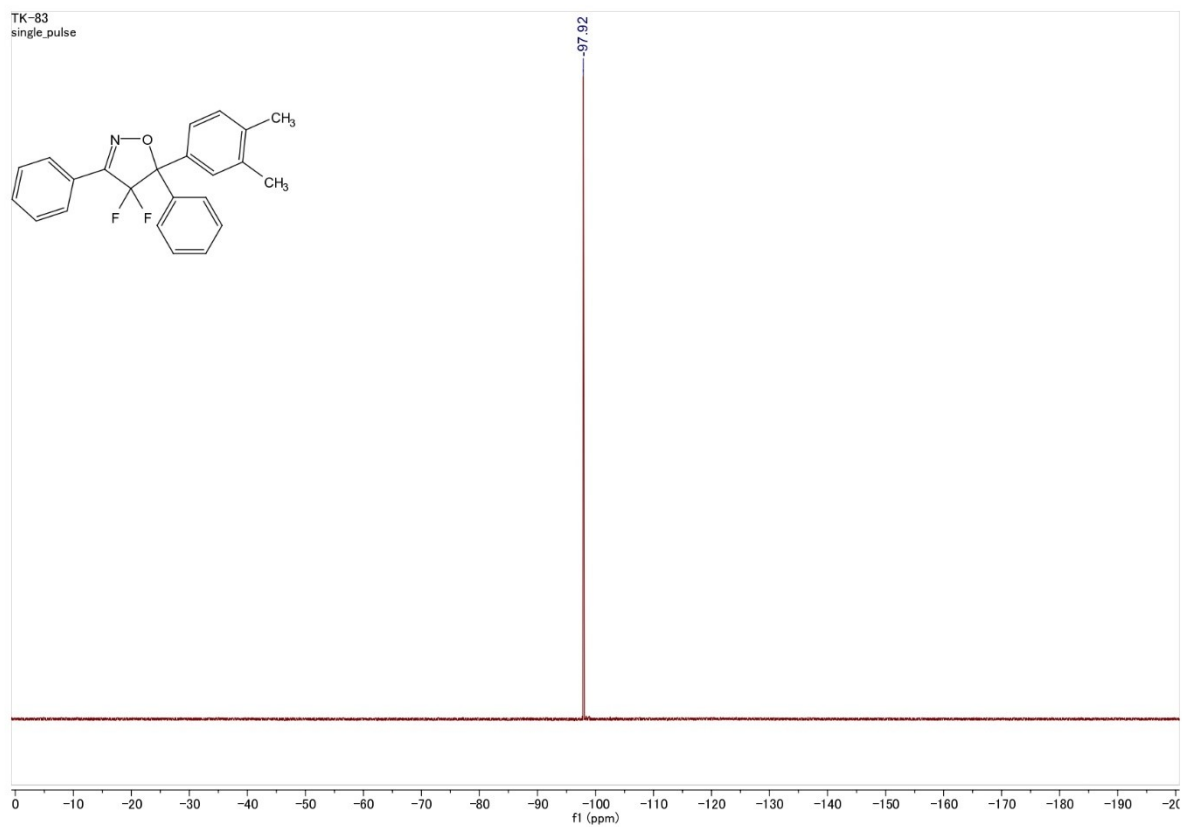



### $^{13}\text{C}$ NMR of **5aH**

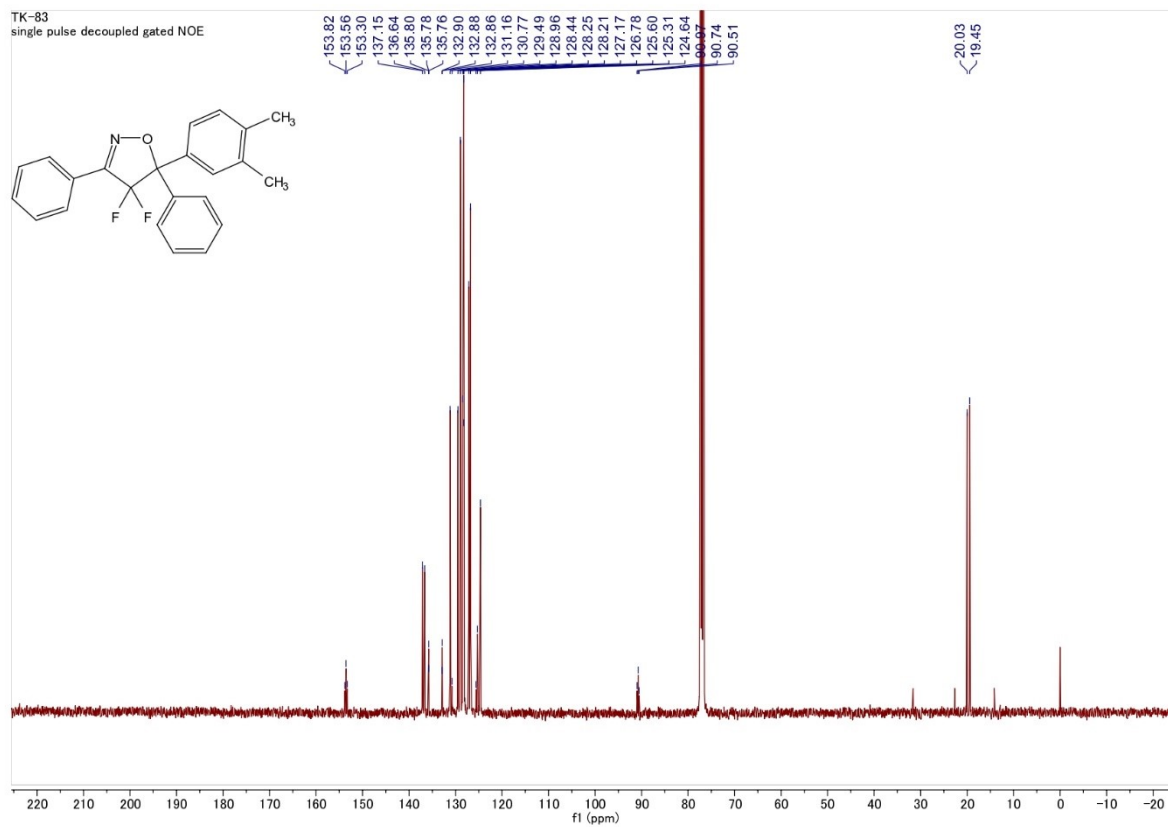

### DEPT135 of **5aH**

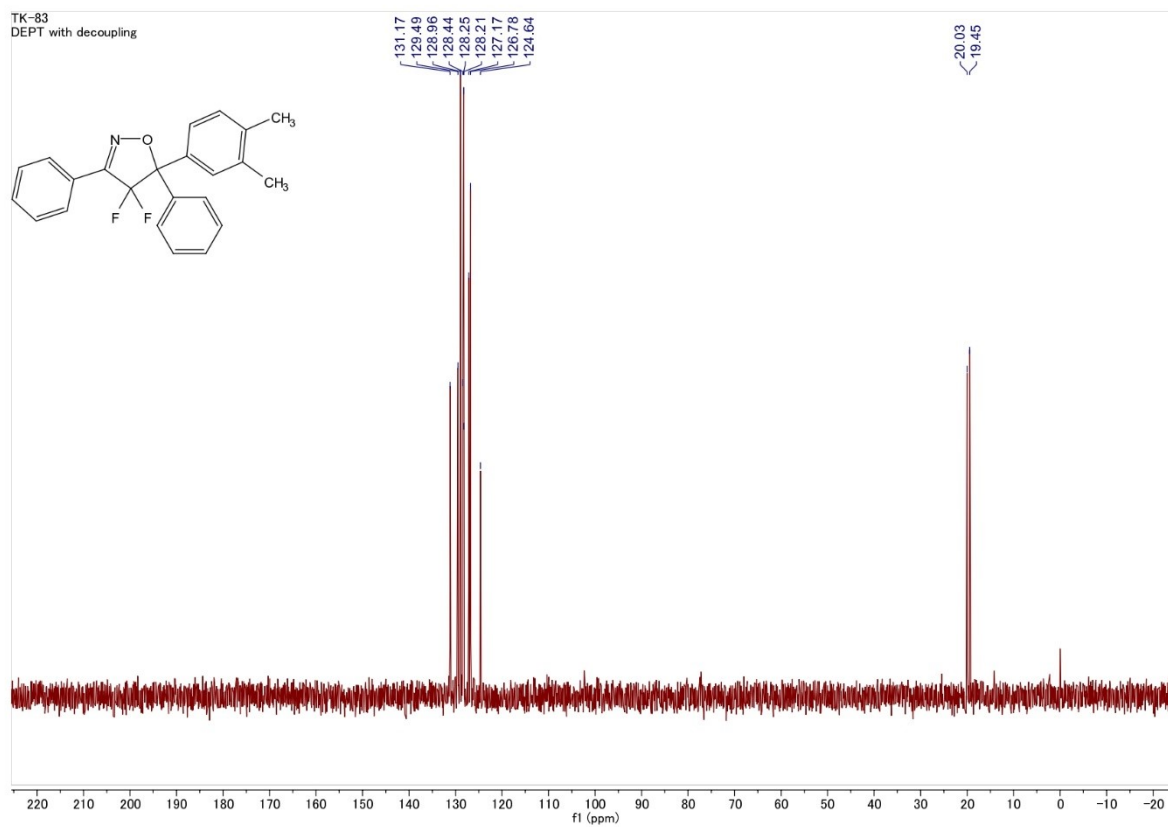

# <sup>1</sup>H NMR of 5aI

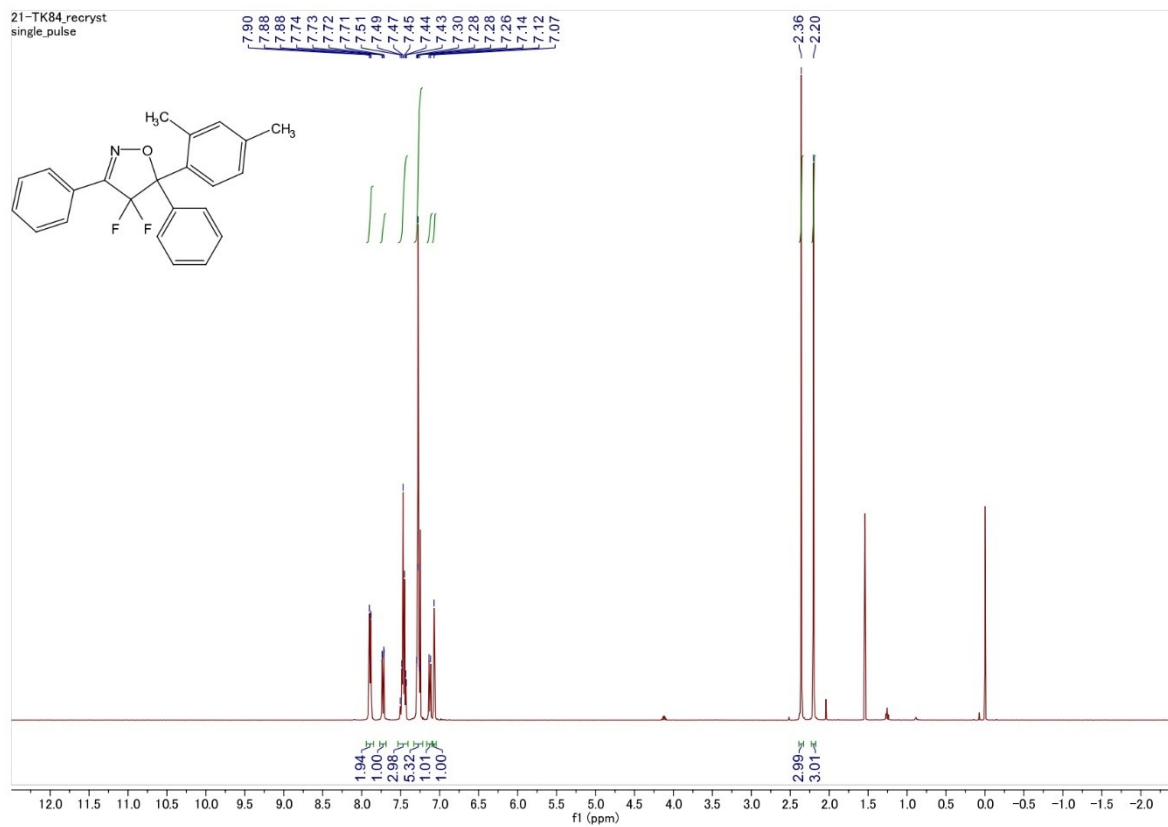

# <sup>19</sup>F NMR of 5aI

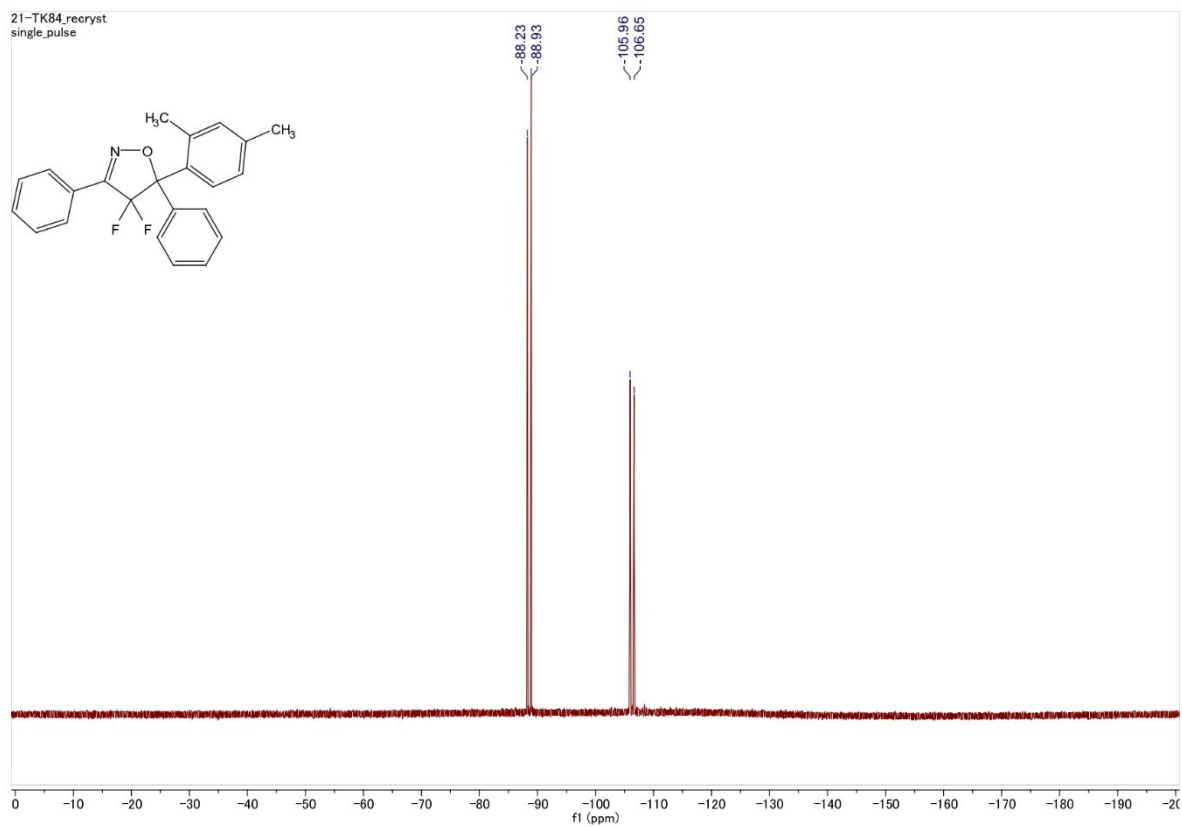

### $^{13}\text{C}$ NMR of **5aI**

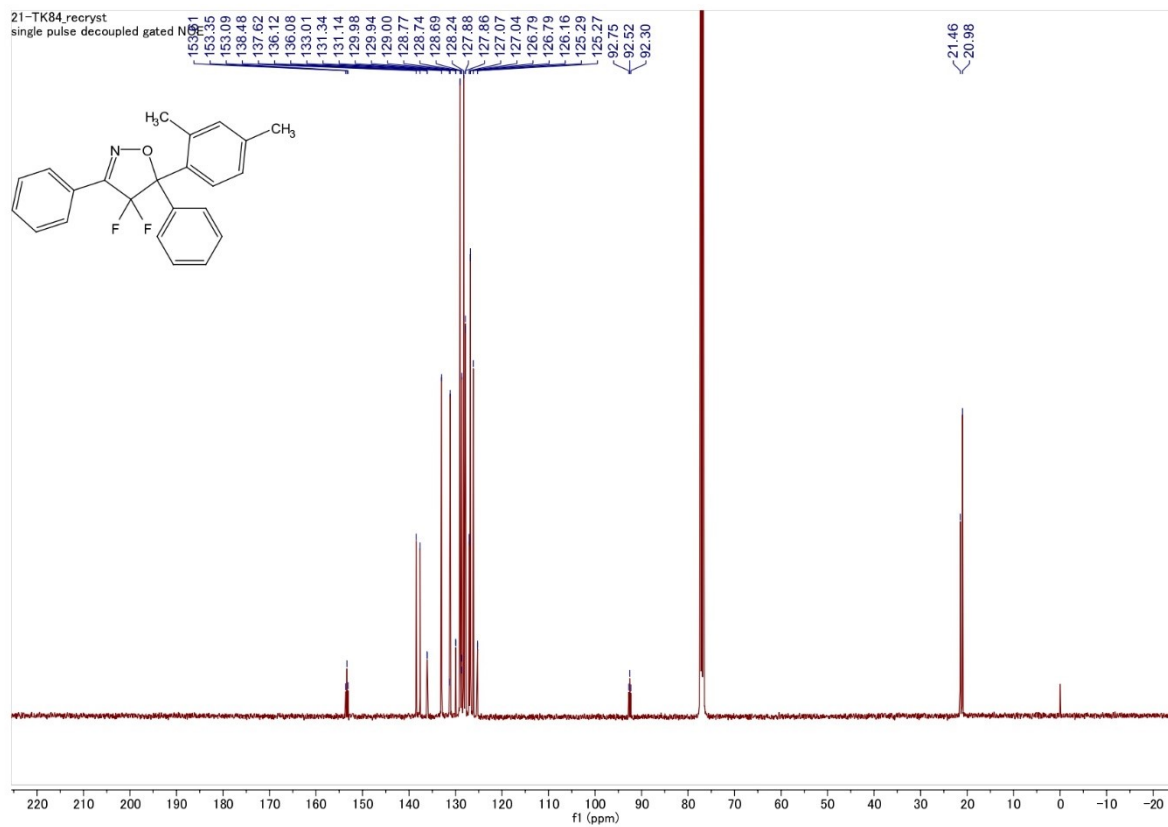

### DEPT135 of **5aI**

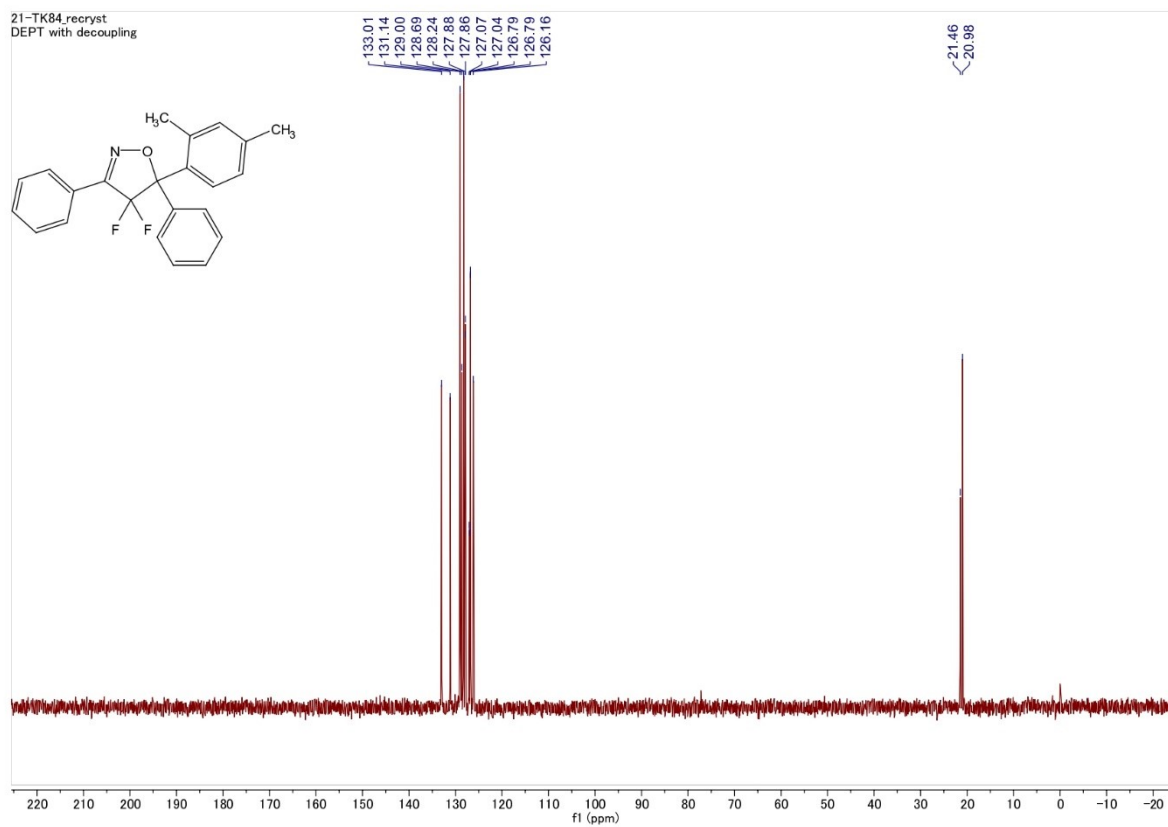

# <sup>1</sup>H NMR of 5aJ

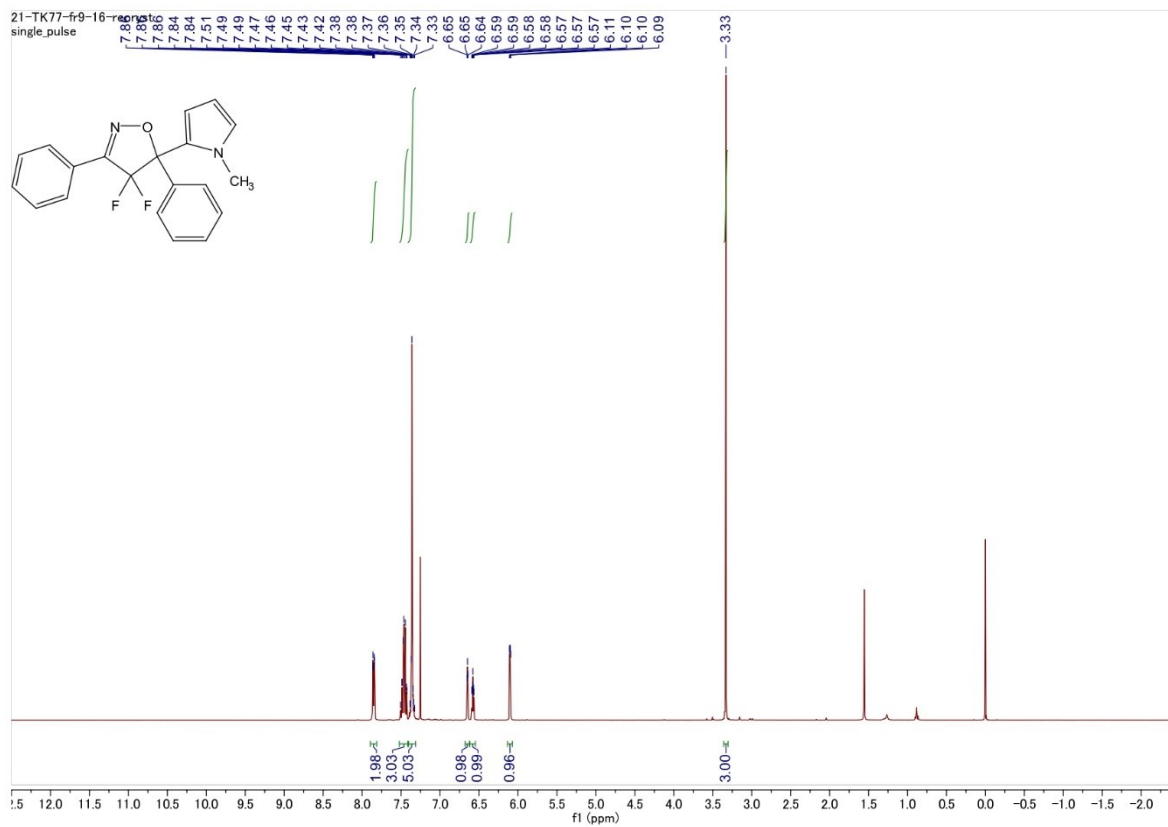

# <sup>19</sup>F NMR of 5aJ

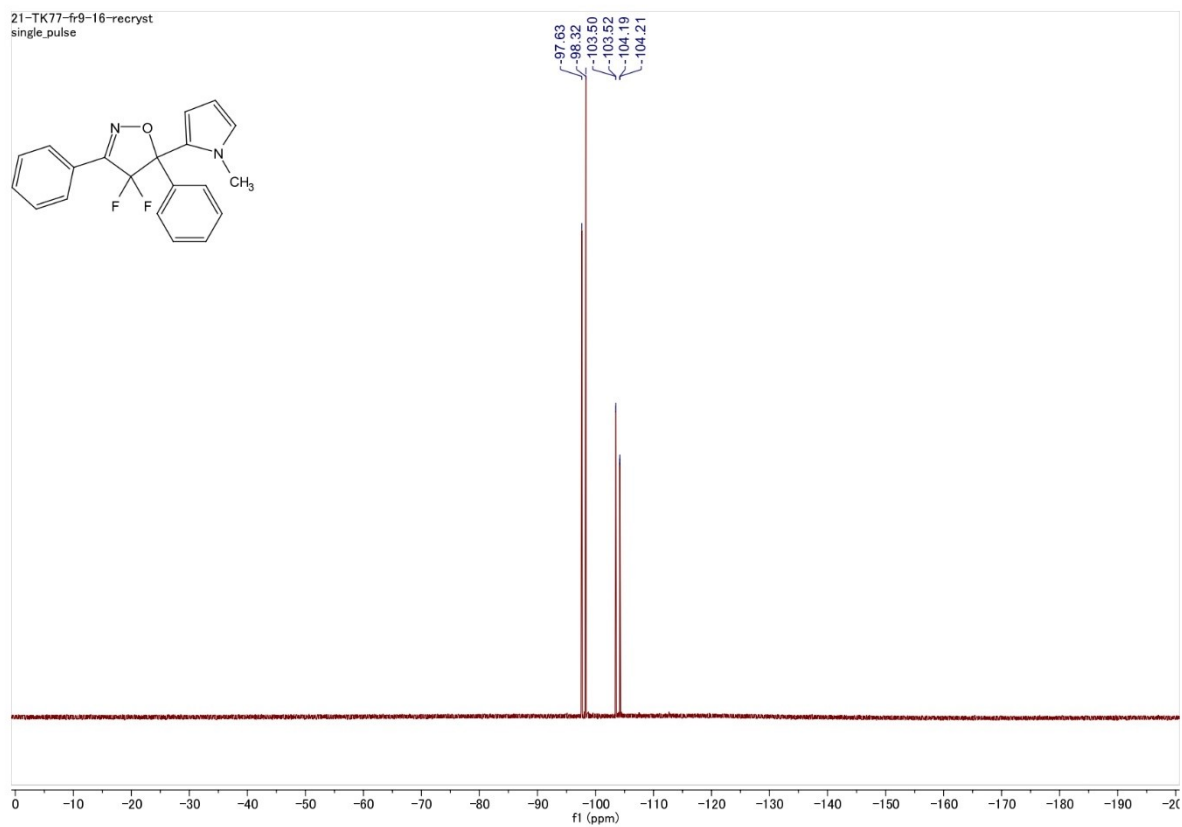

### <sup>13</sup>C NMR of 5aJ

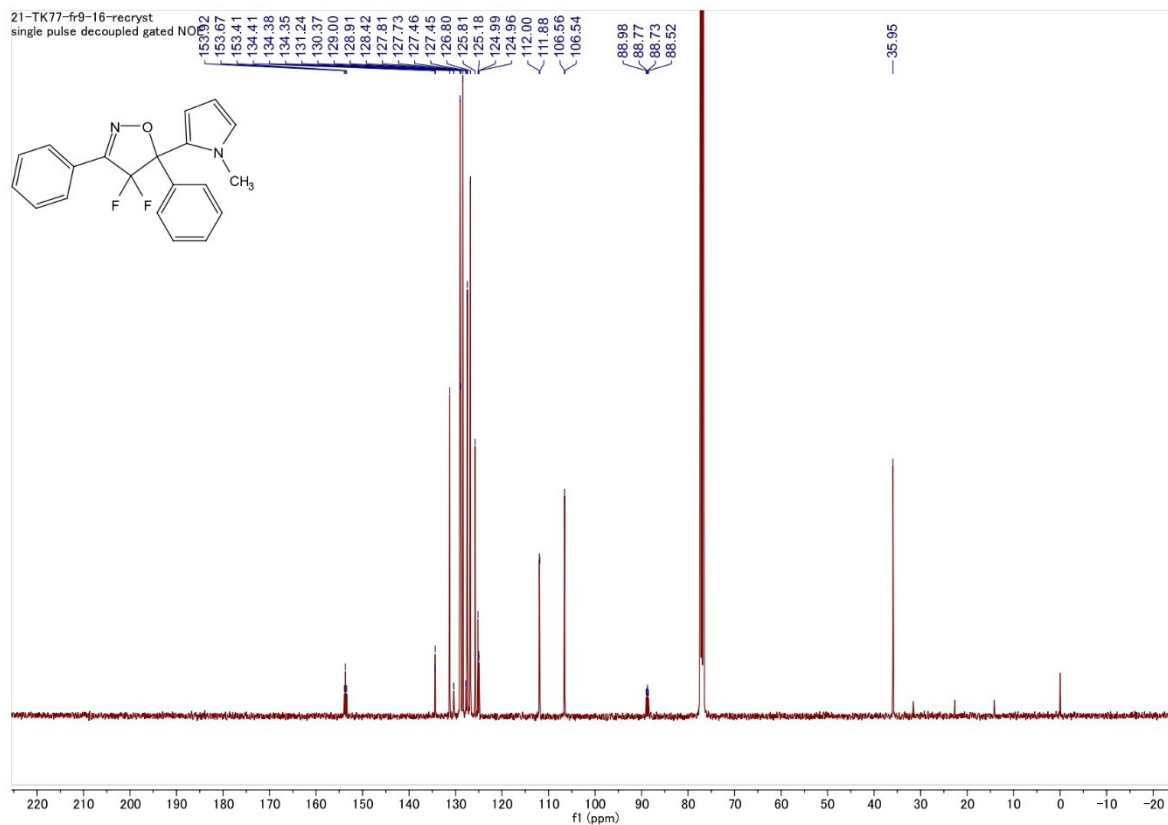

### DEPT135 of 5aJ

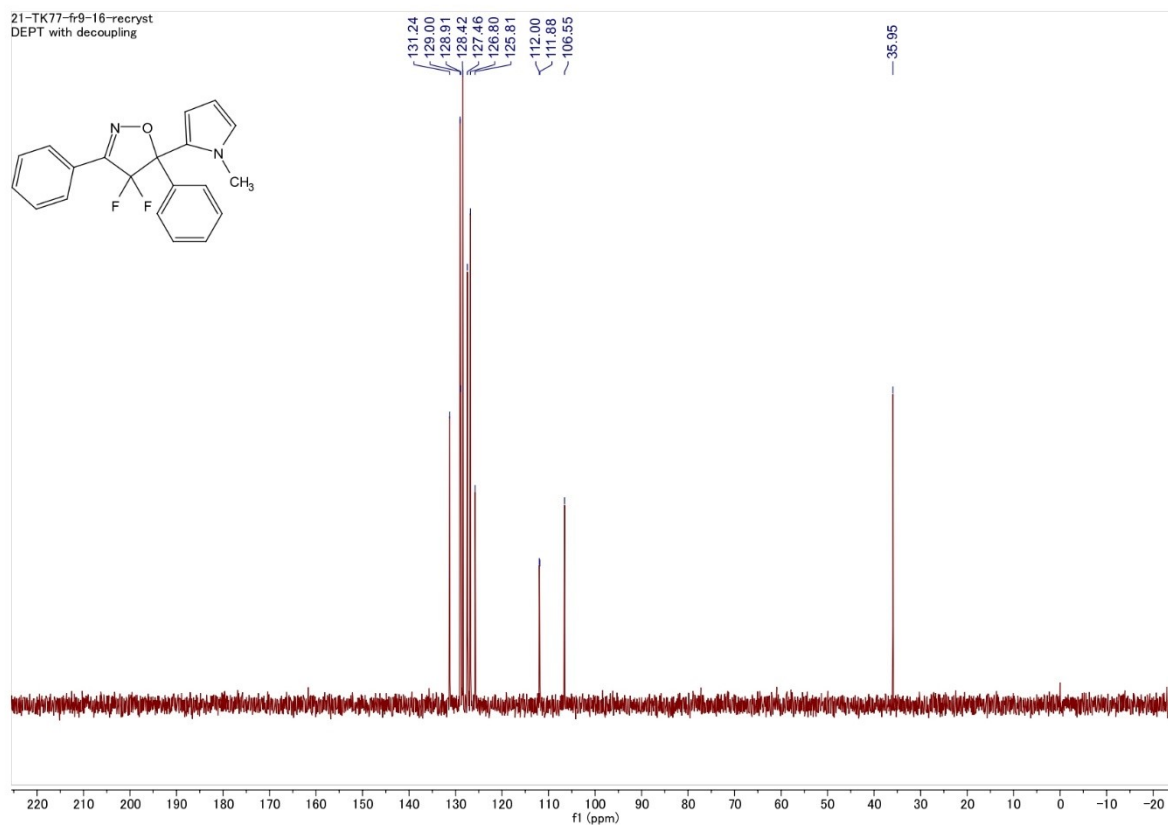

# <sup>1</sup>H NMR of 5aJ'

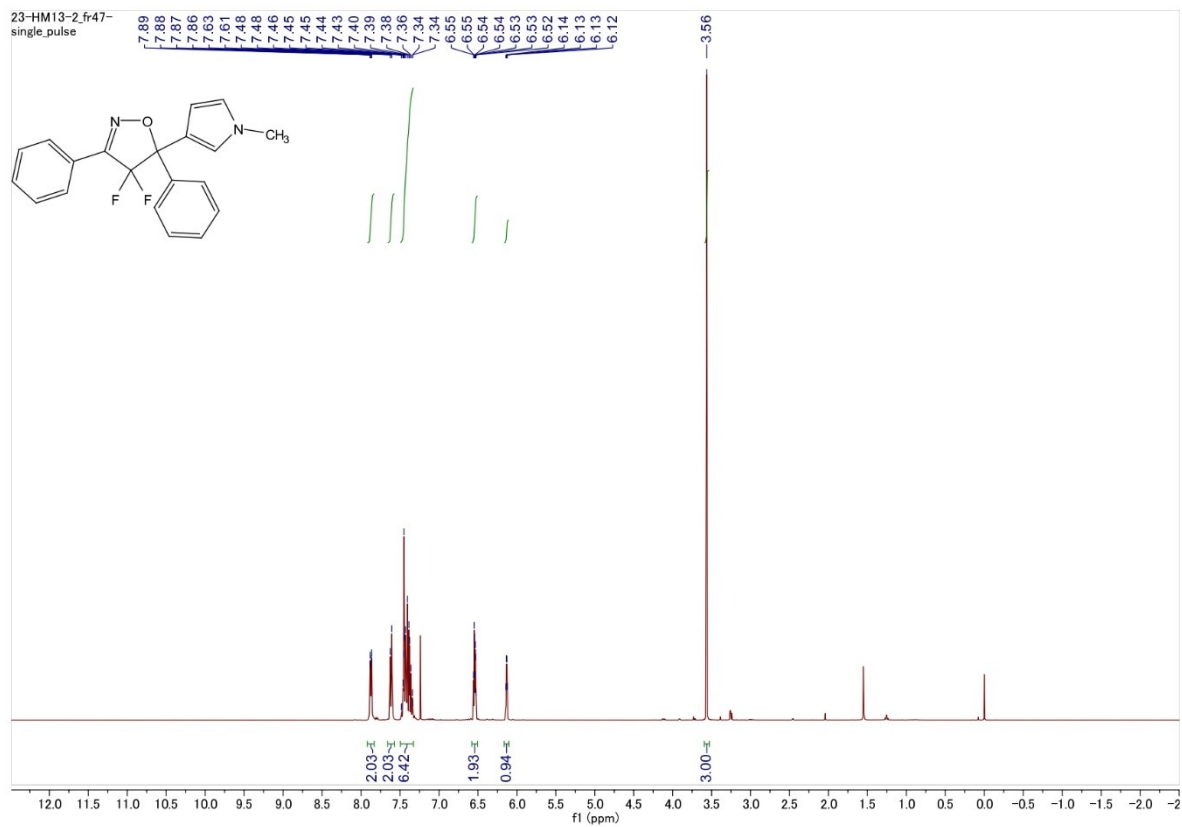

# <sup>19</sup>F NMR of 5aJ'

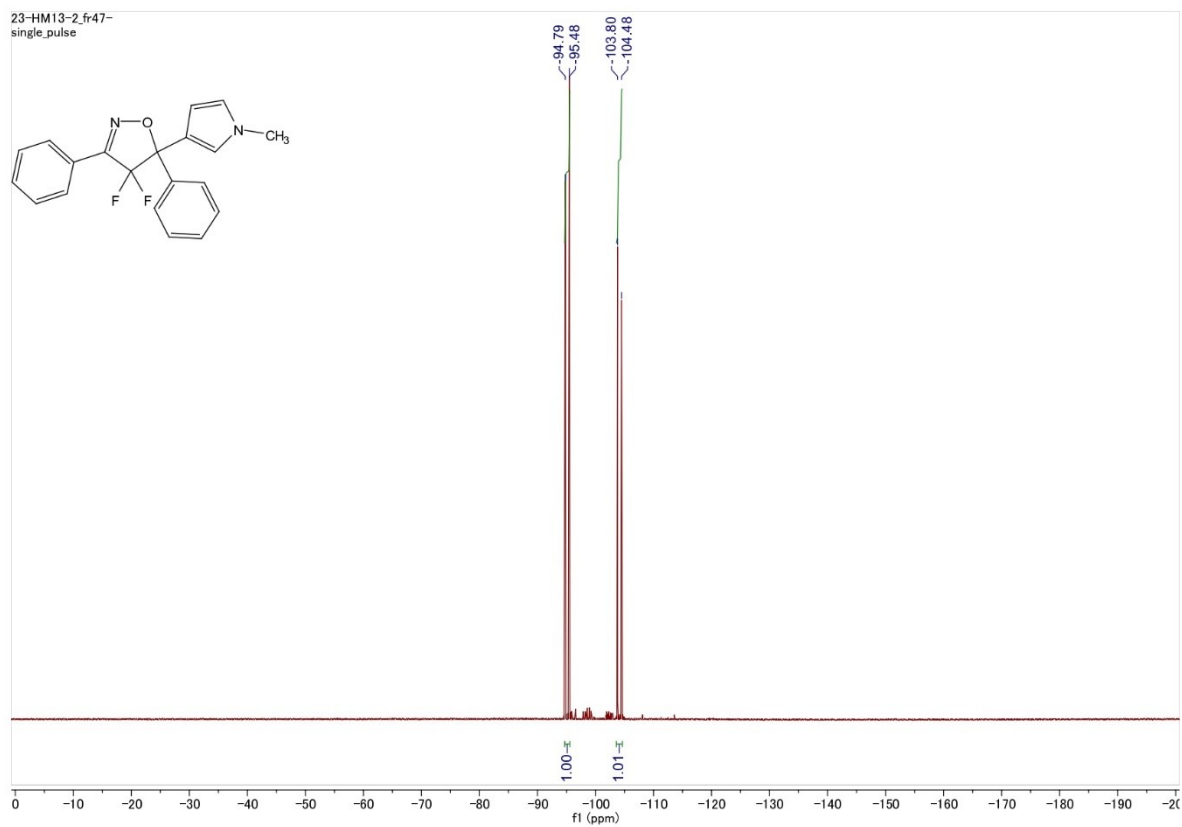

### $^{13}\text{C}$ NMR of **5aJ'**

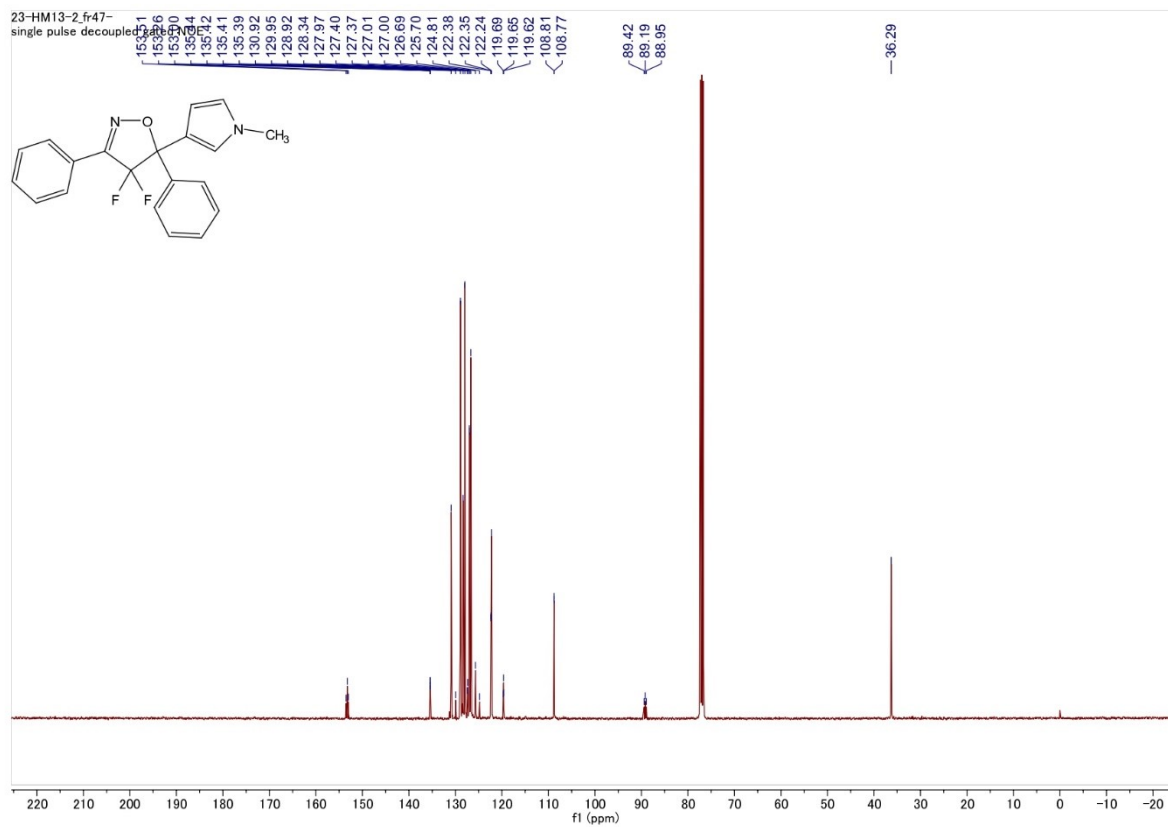

### DEPT135 of **5aJ'**

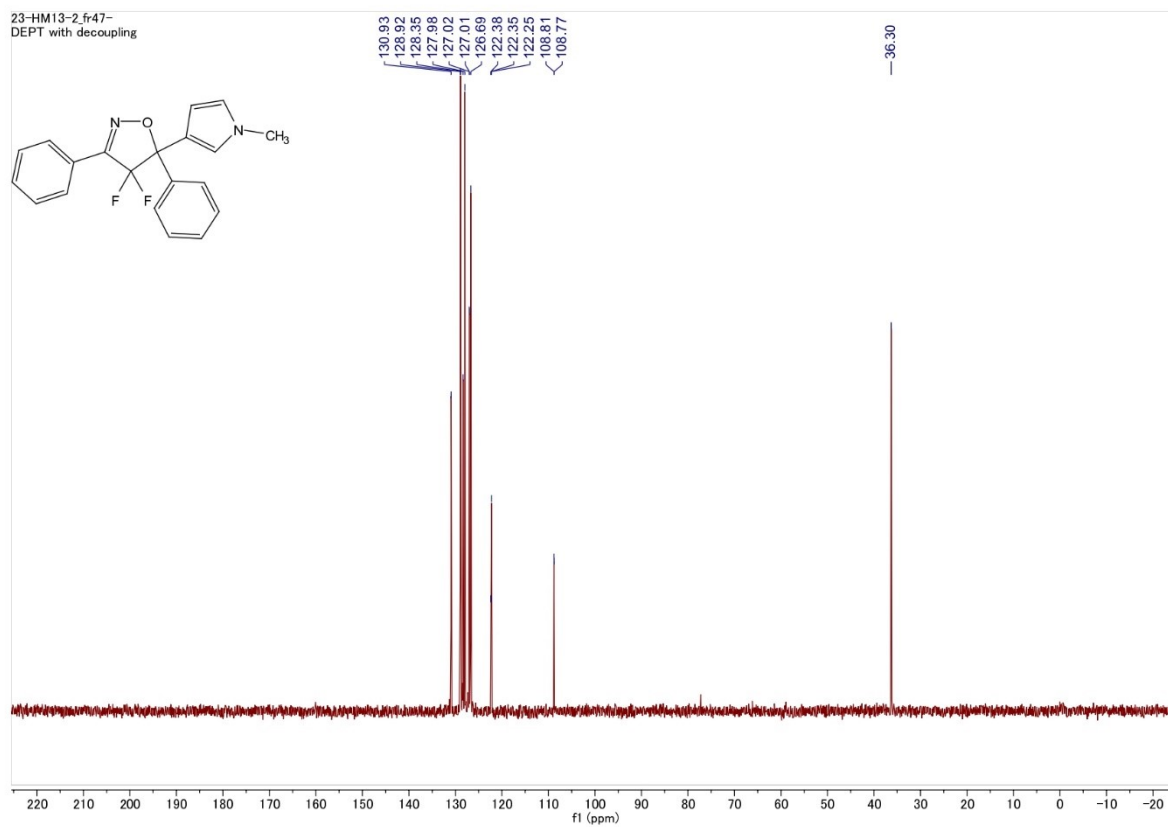

# <sup>1</sup>H NMR of 5aK

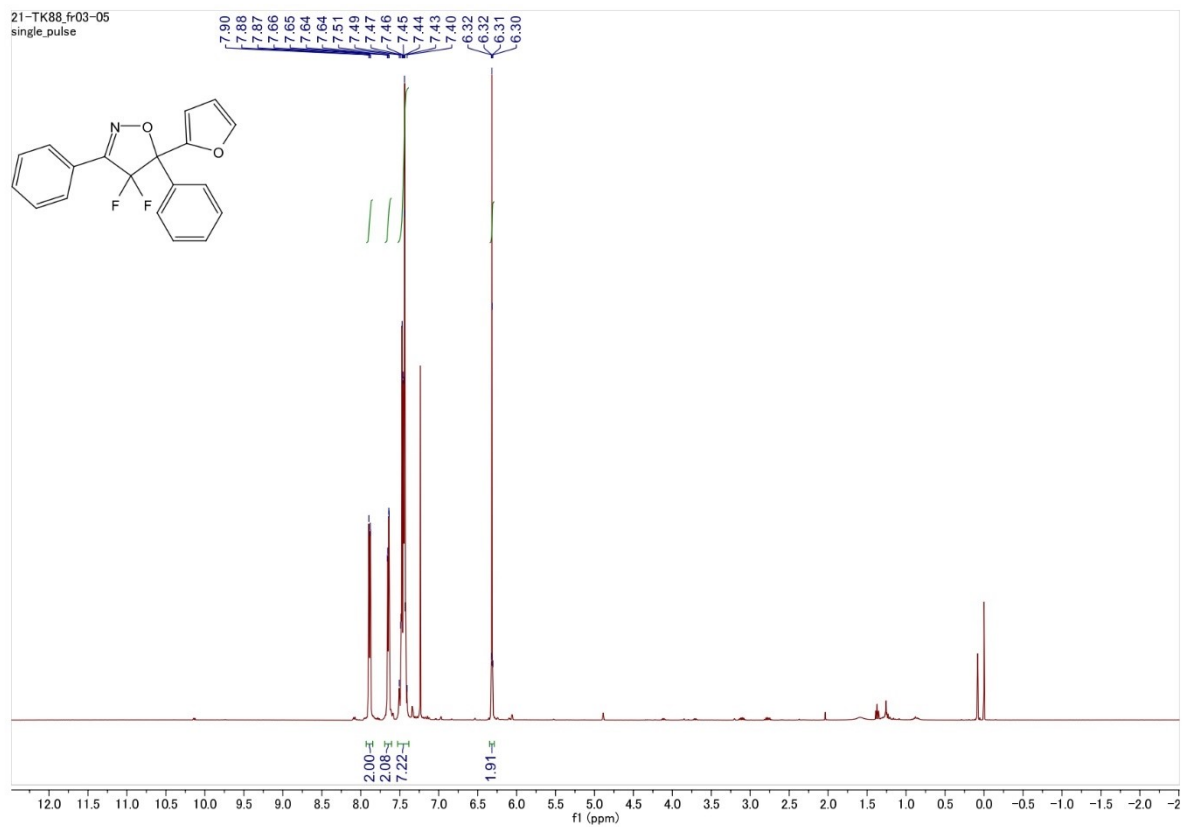

# <sup>19</sup>F NMR of 5aK

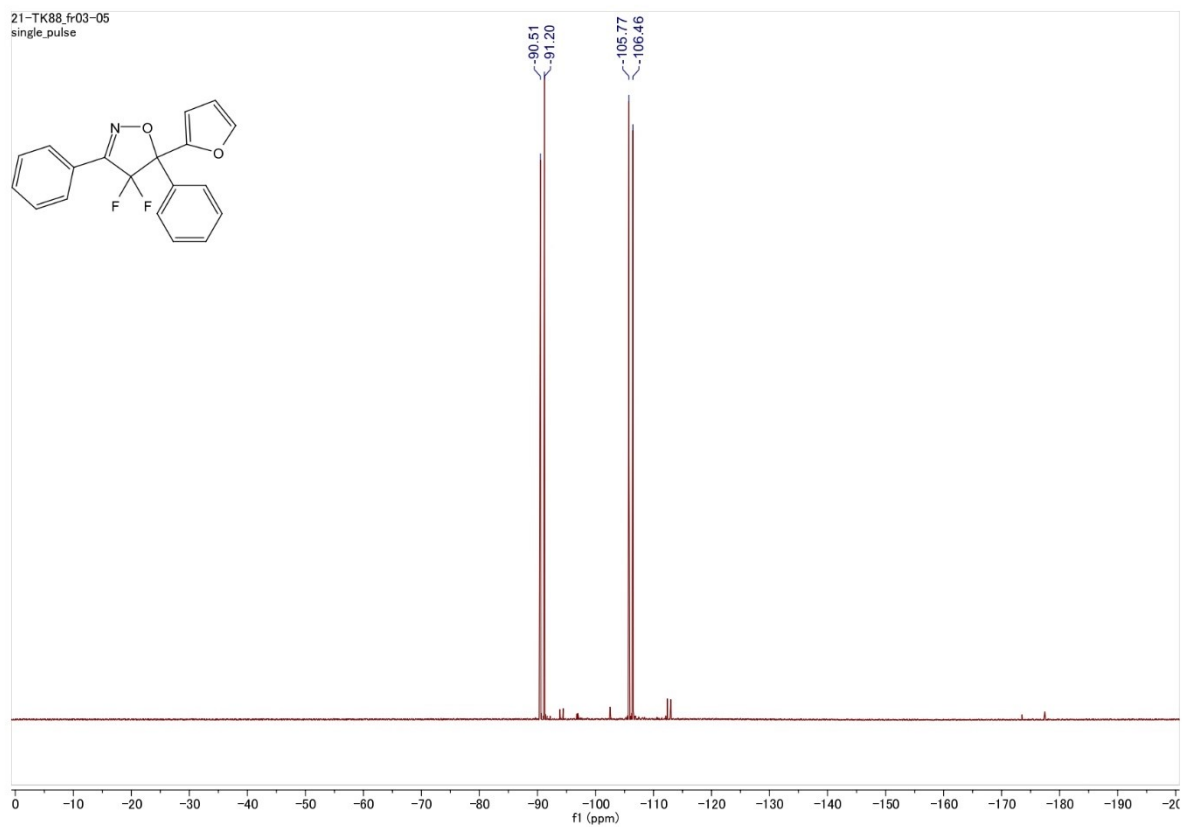



# <sup>13</sup>C NMR of 5aK

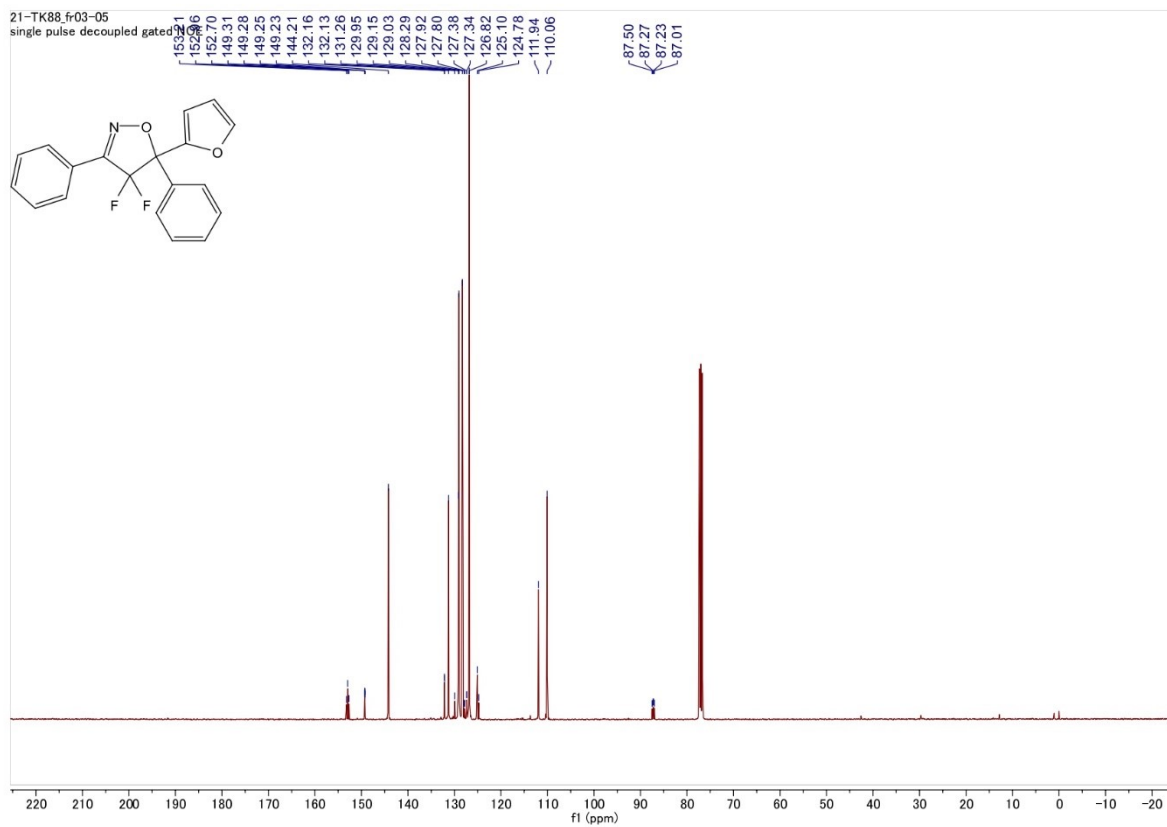

# DEPT135 of 5aK

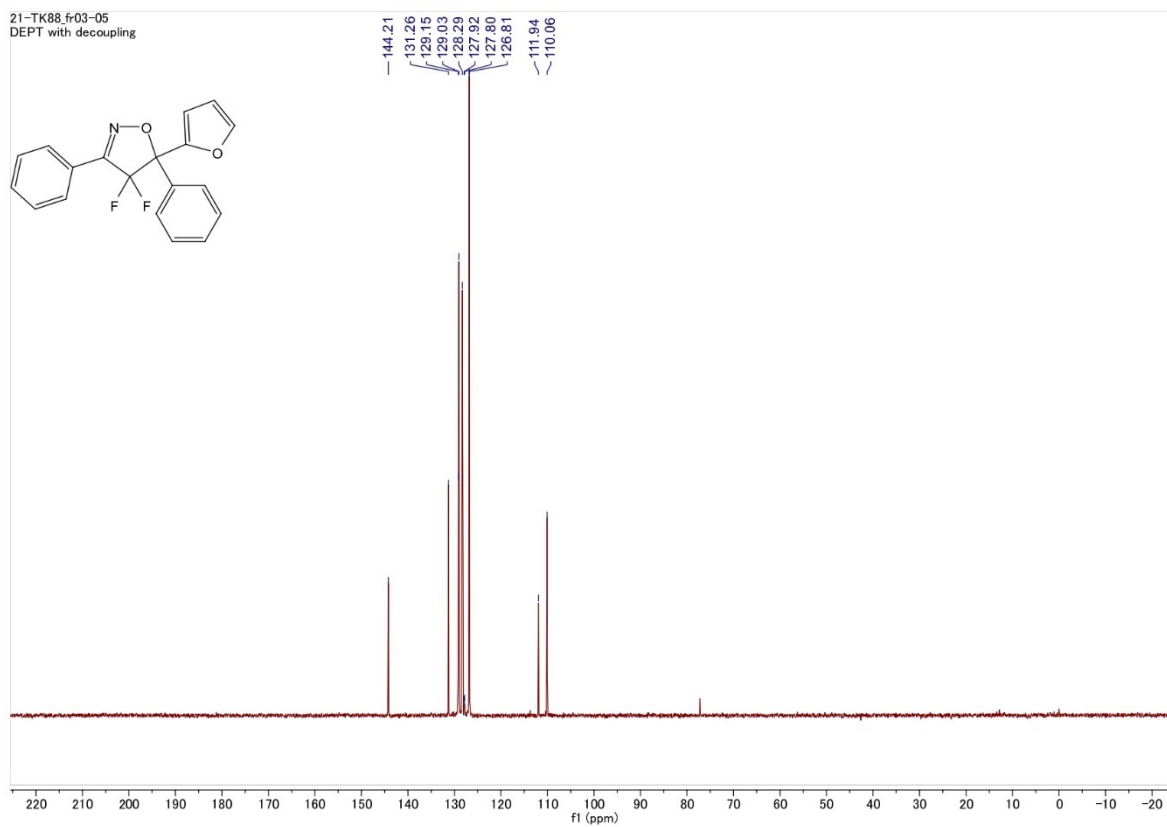

# <sup>1</sup>H NMR of 5aL

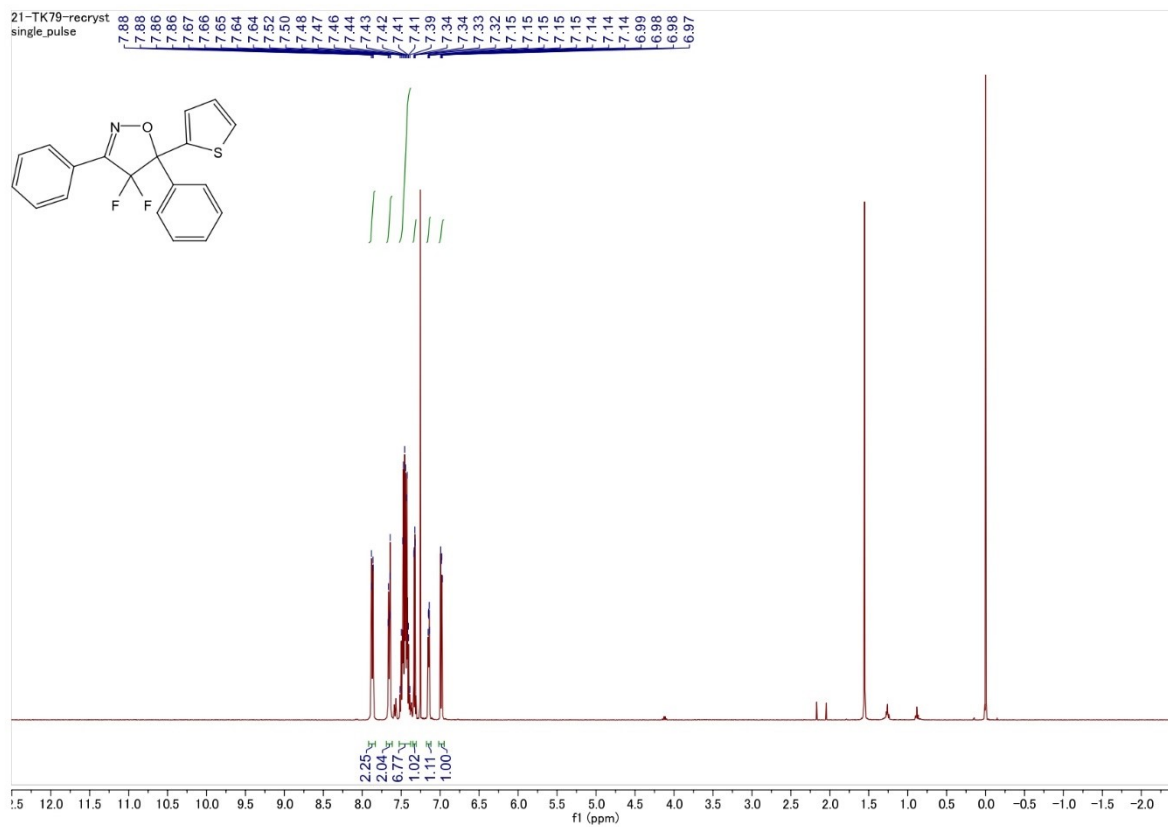

# <sup>19</sup>F NMR of 5aL

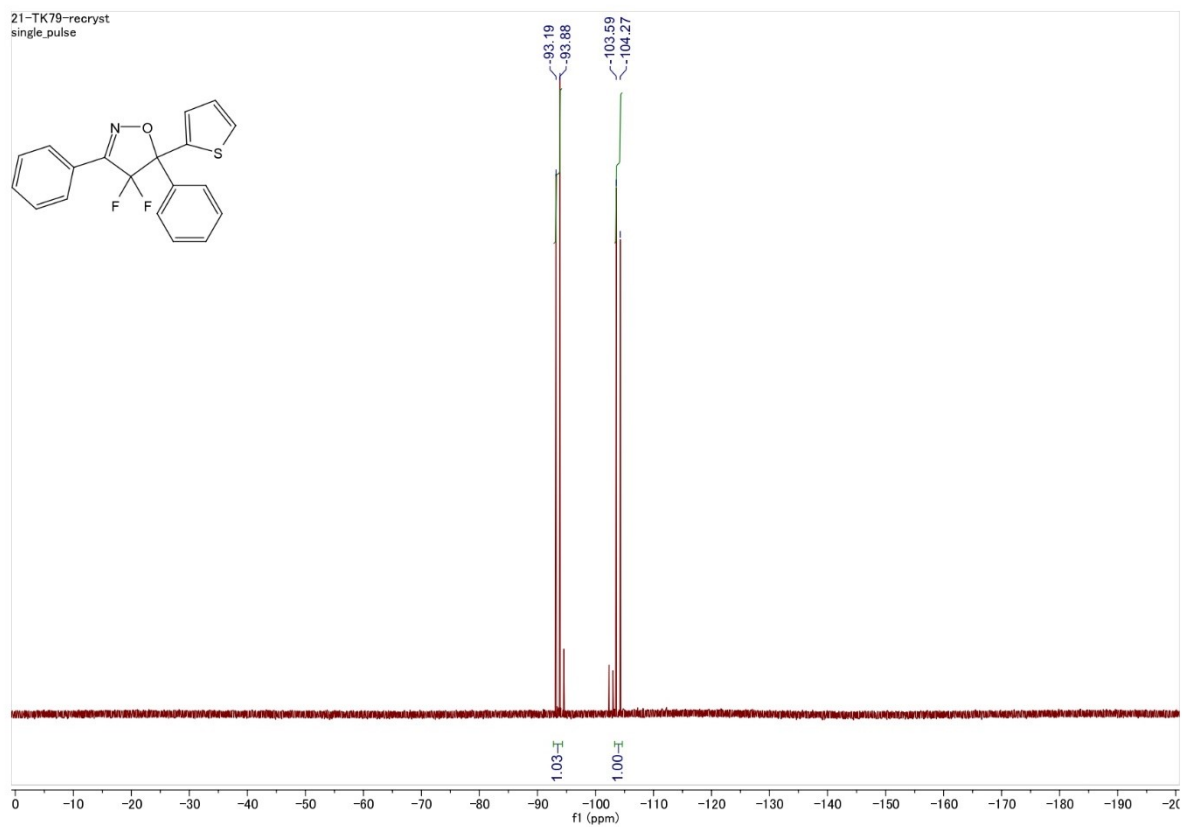

# <sup>13</sup>C NMR of 5aL

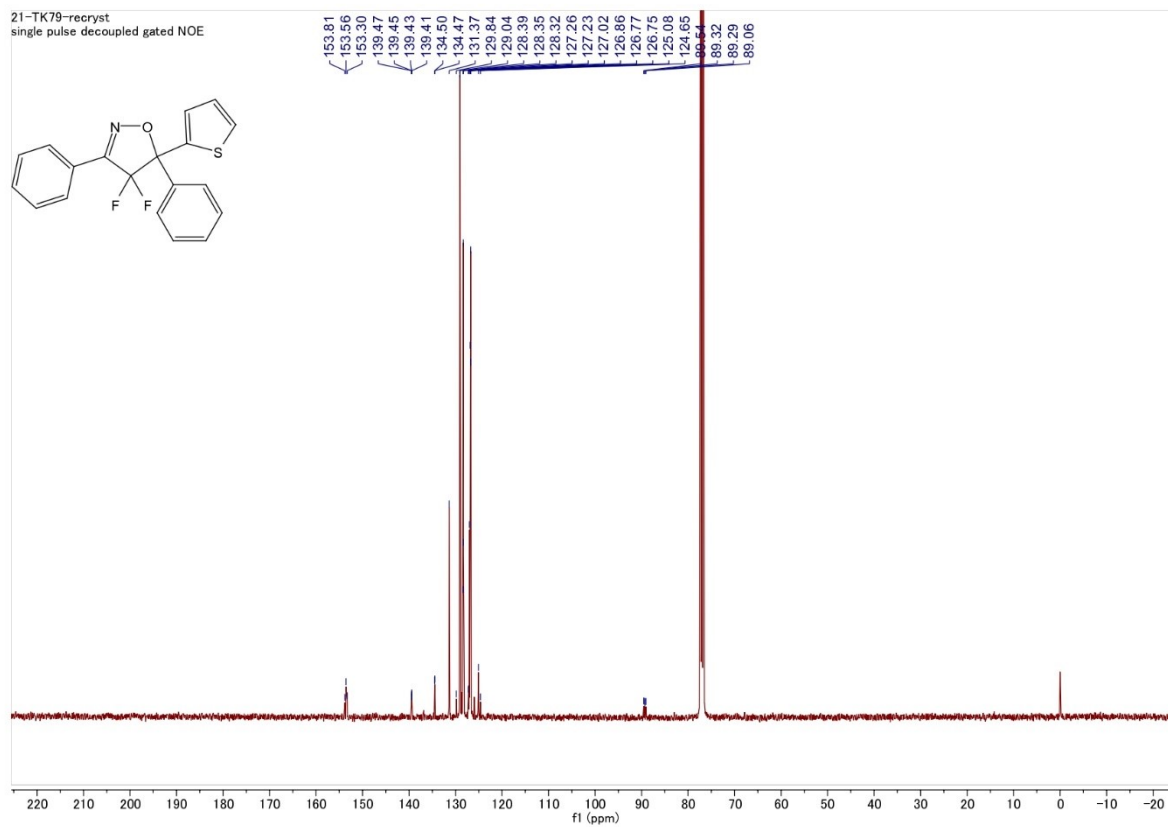

# DEPT135 of 5aL

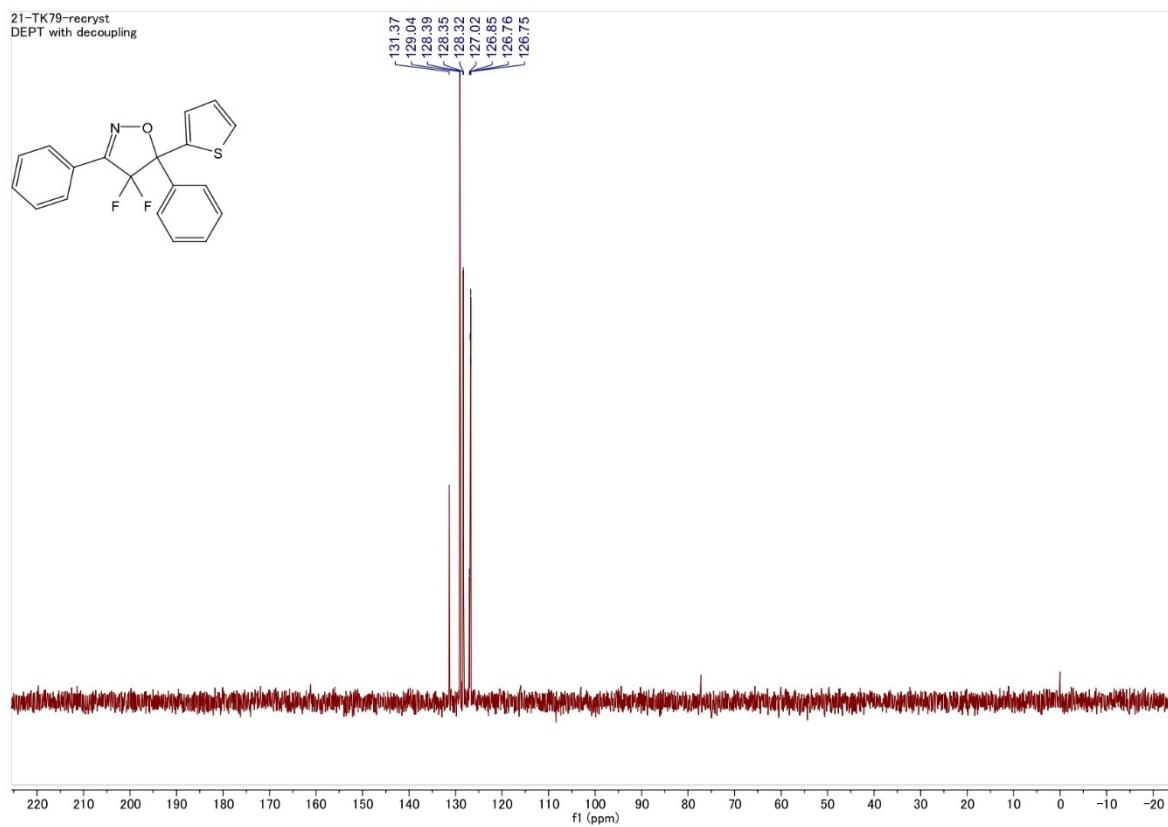

# <sup>1</sup>H NMR of 5bB

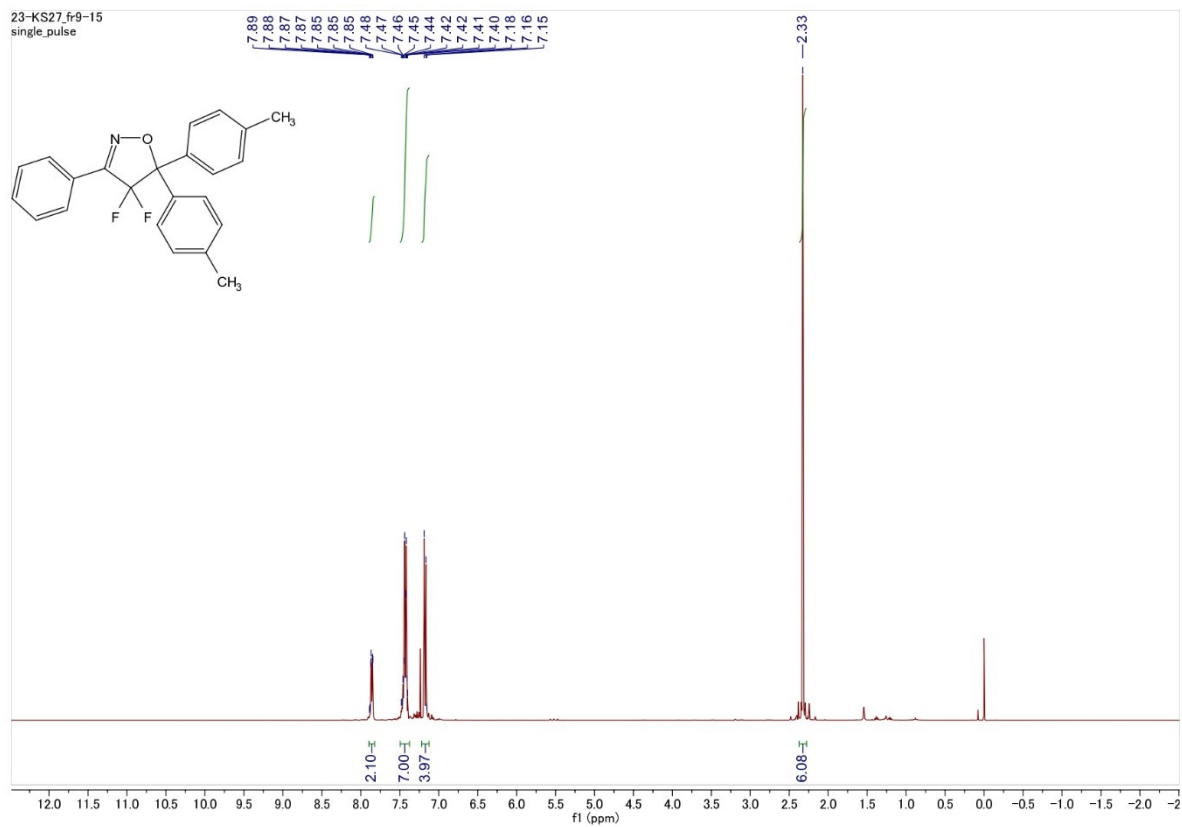

# <sup>19</sup>F NMR of 5bB

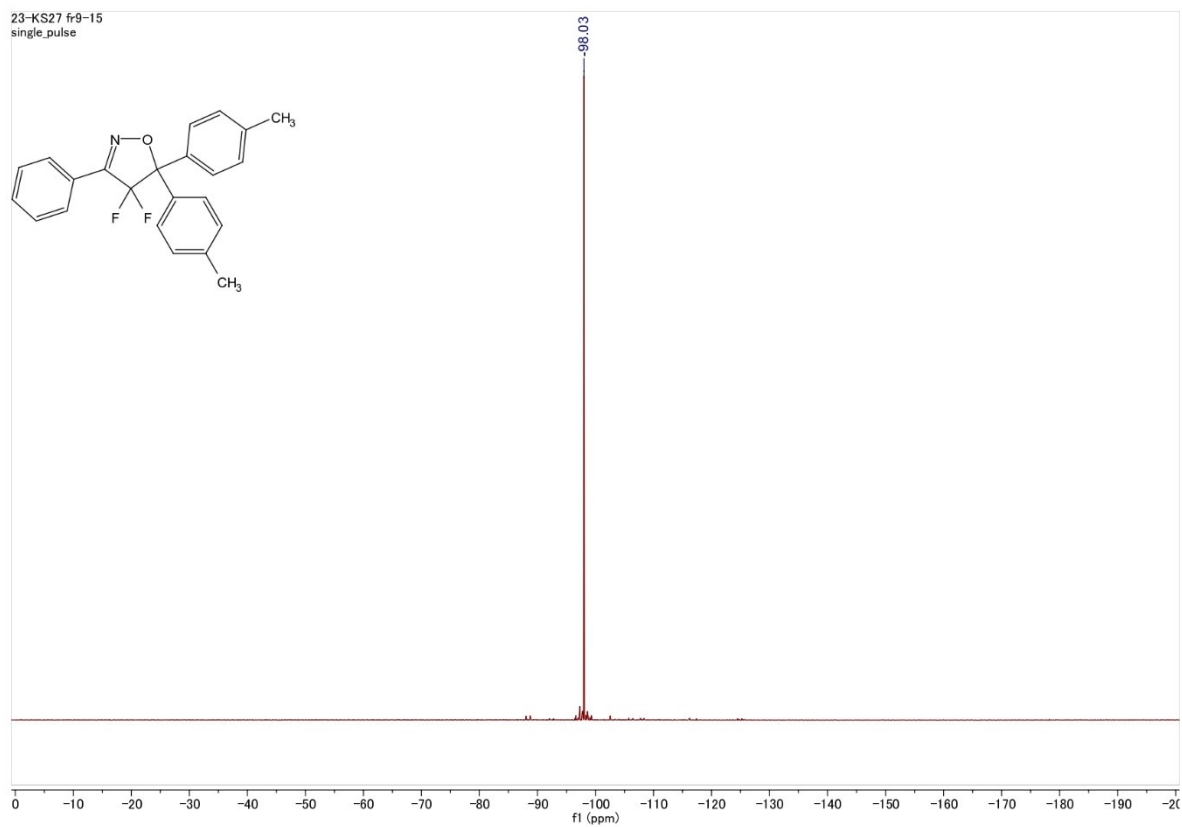

### <sup>13</sup>C NMR of **5bB**

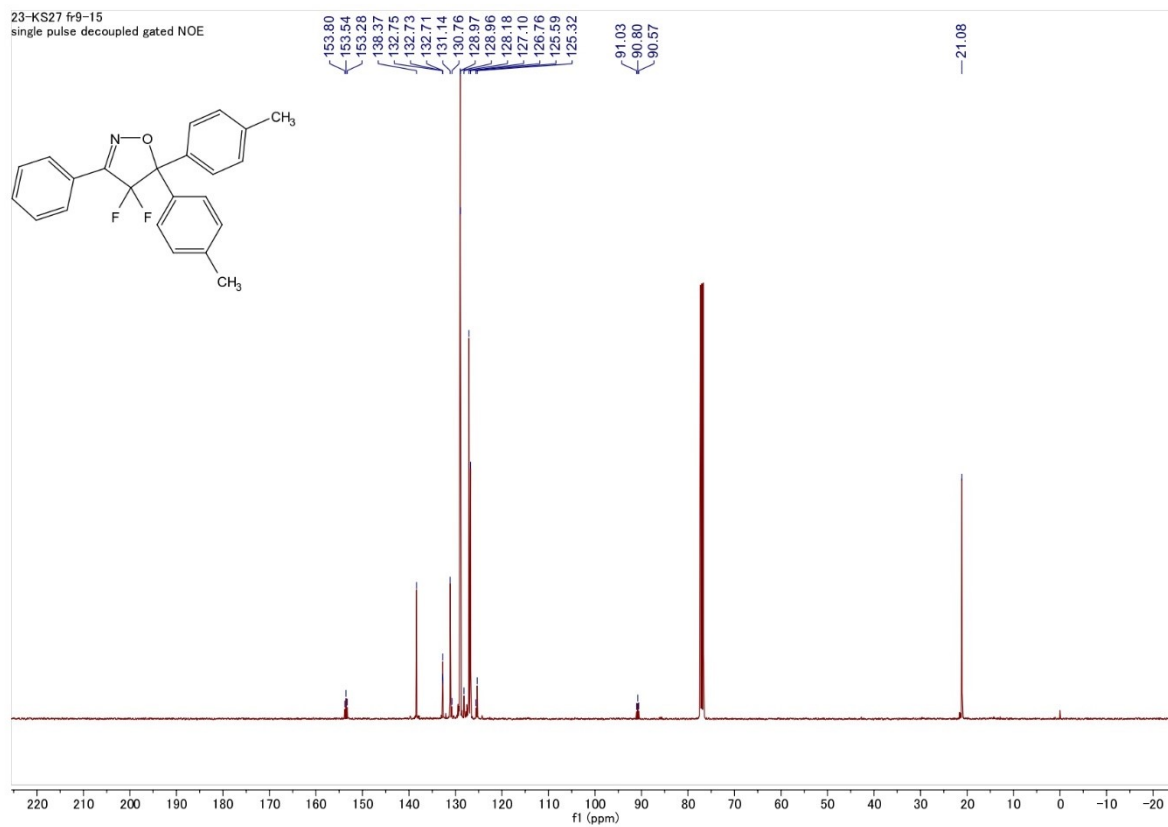

### DEPT135 of **5bB**

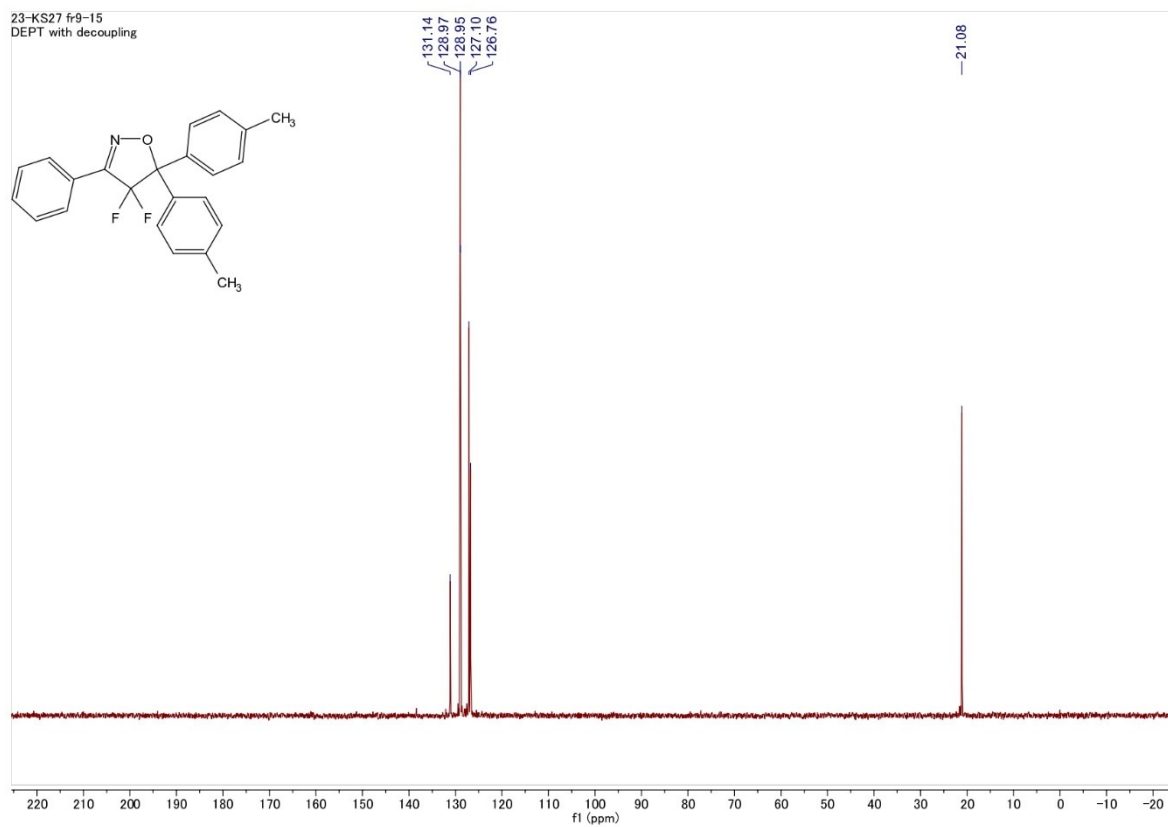

### <sup>1</sup>H NMR of 5cB

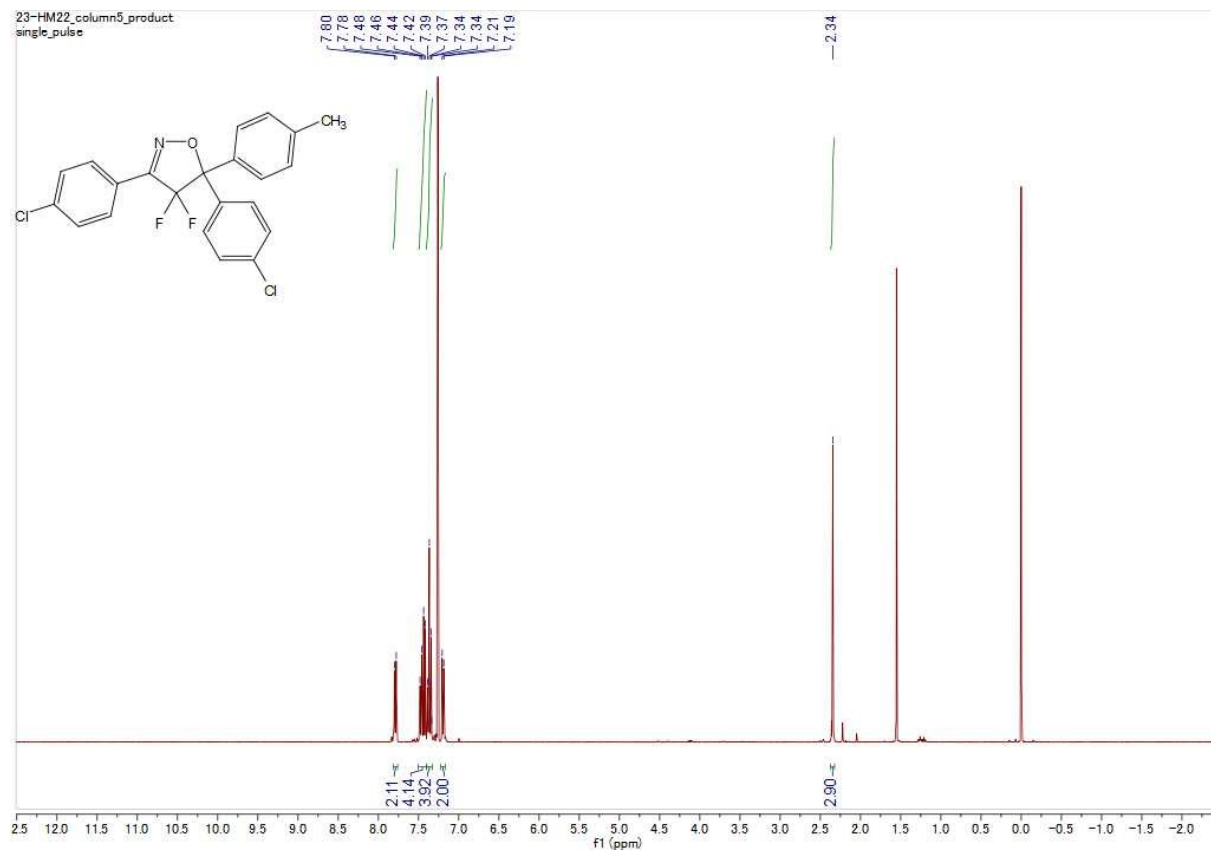

### <sup>19</sup>F NMR of 5cB

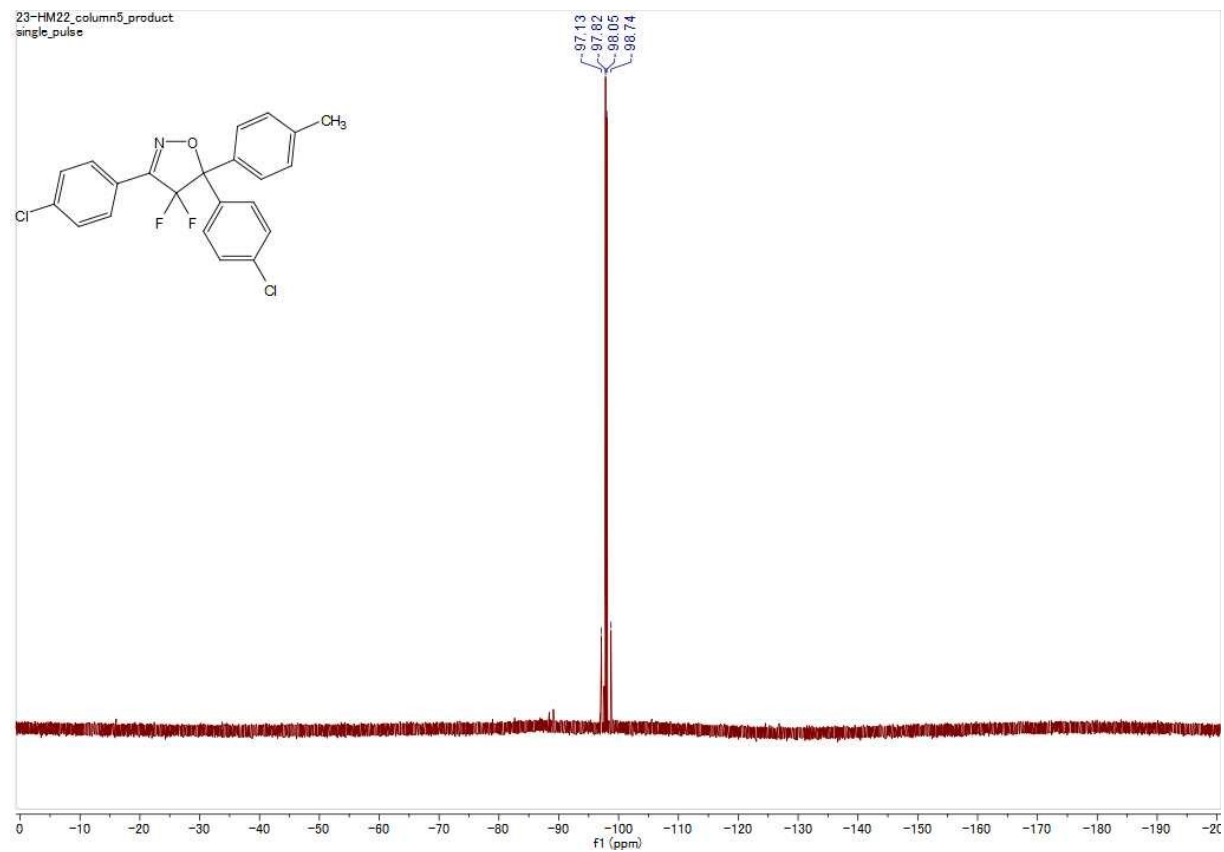

### <sup>13</sup>C NMR of 5cB

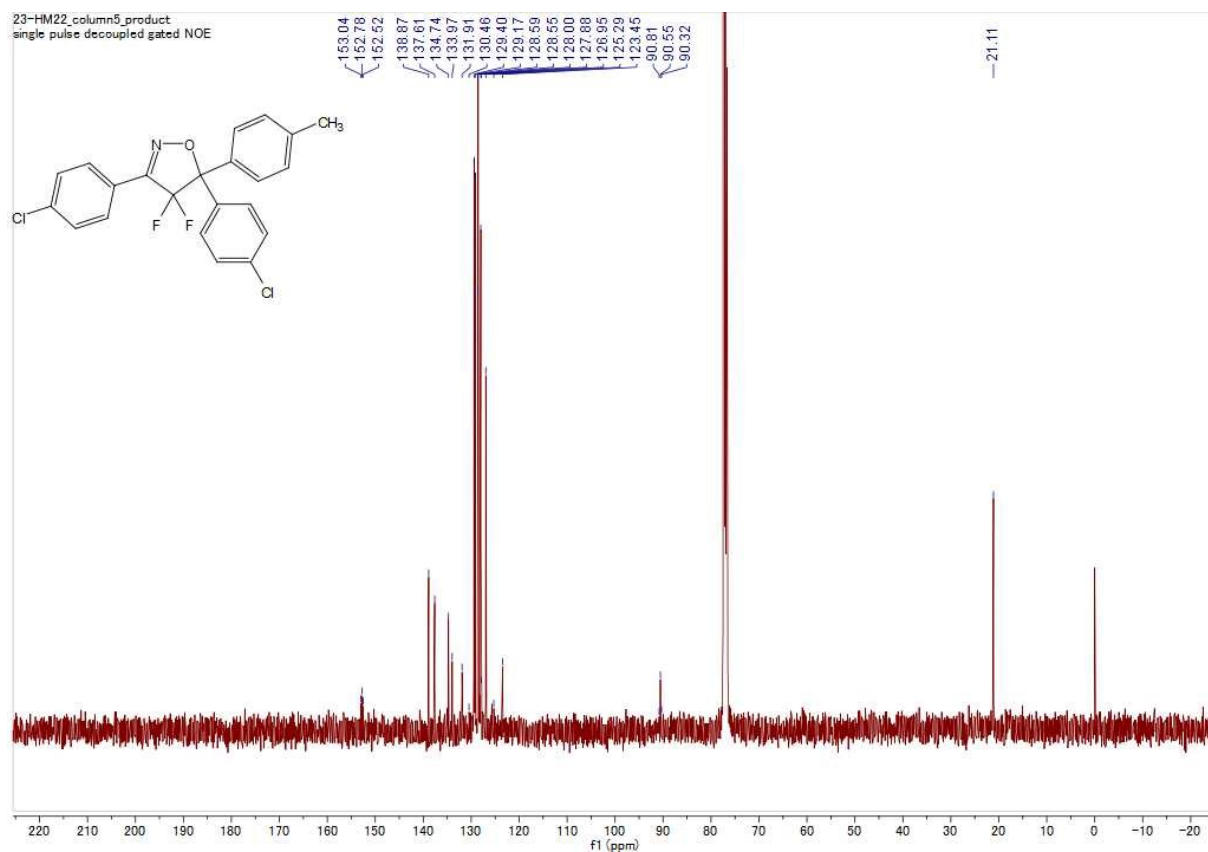

### DEPT135 of 5cB

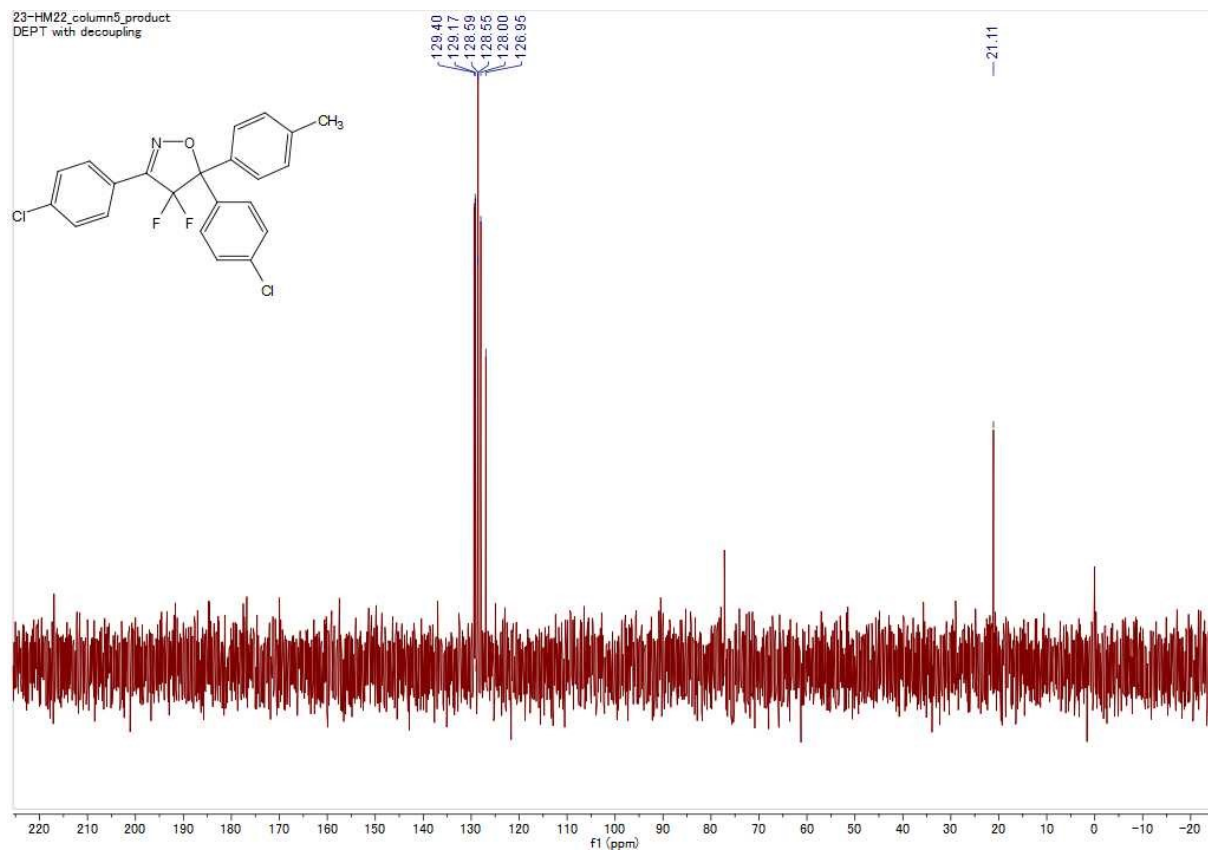

# <sup>1</sup>H NMR of 5dB

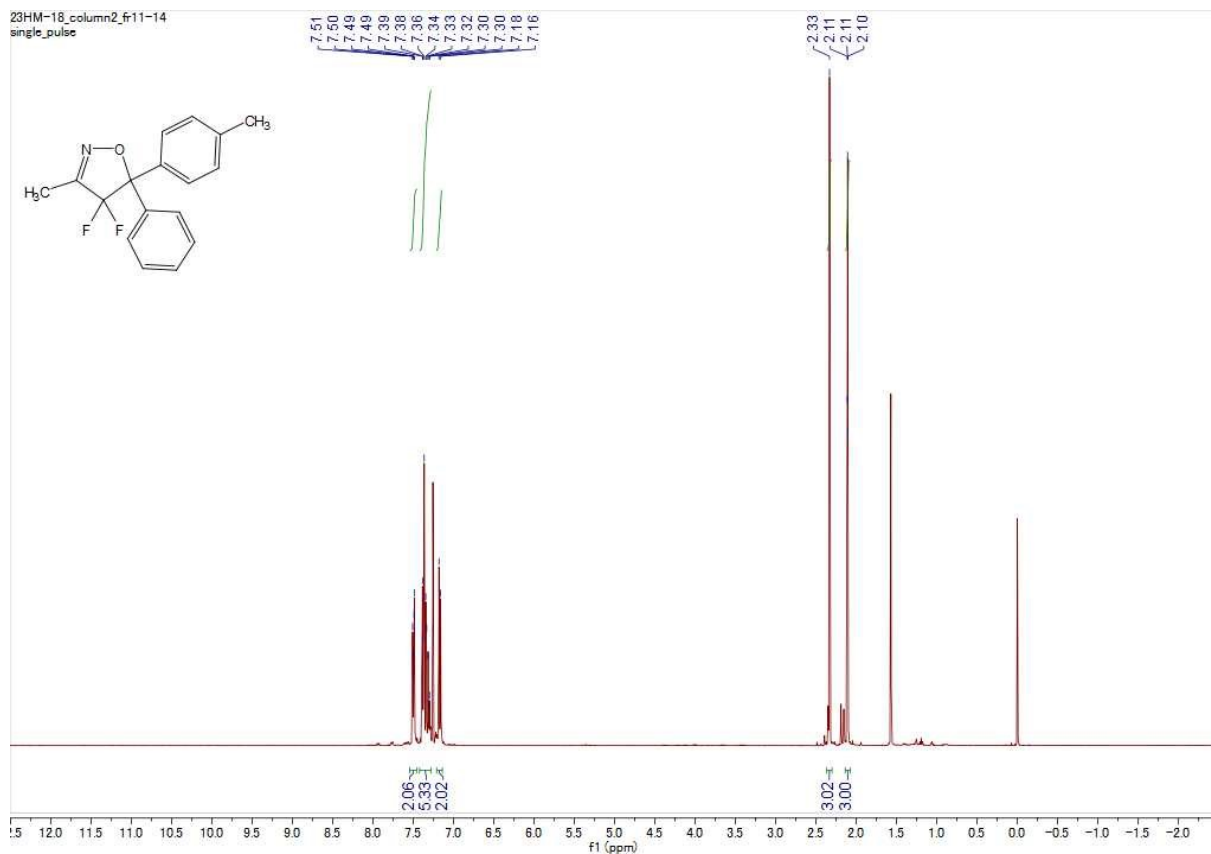

# <sup>19</sup>F NMR of 5dB

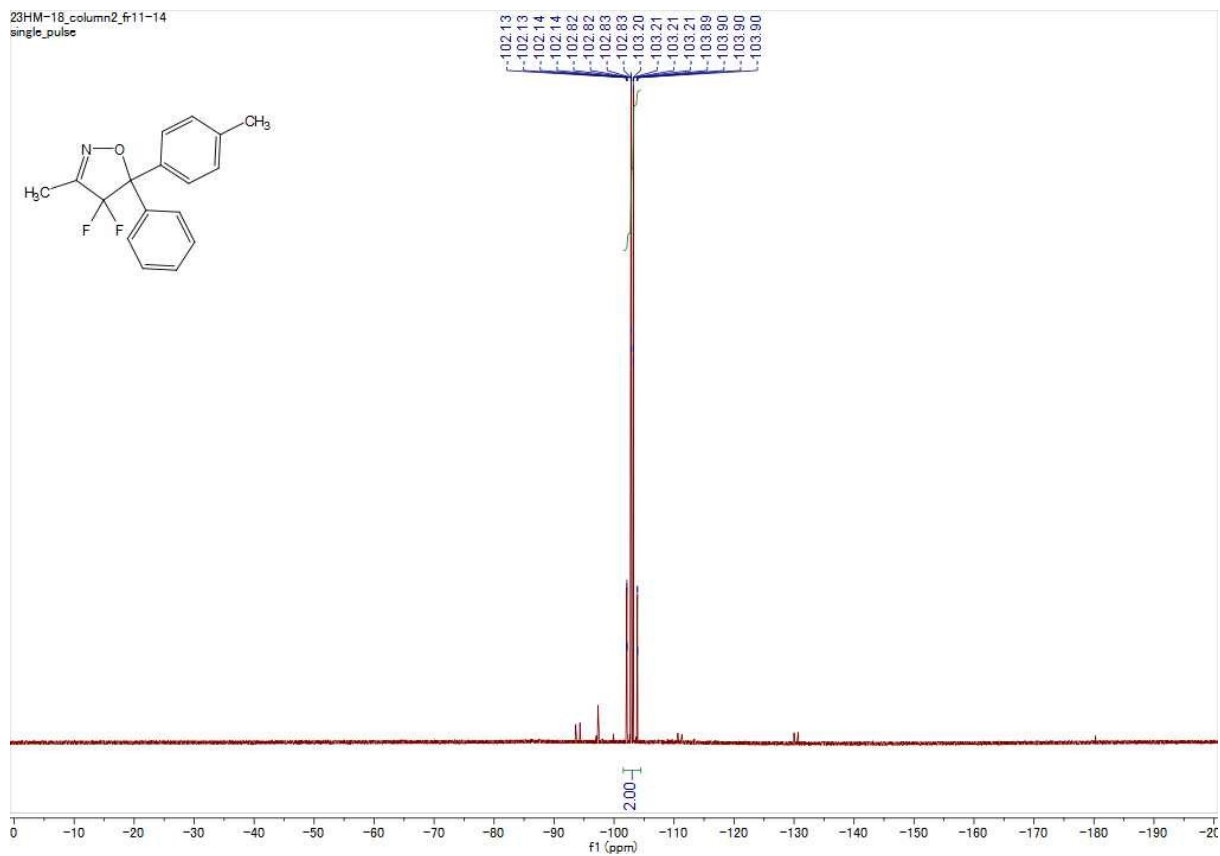



### <sup>13</sup>C NMR of 5dB

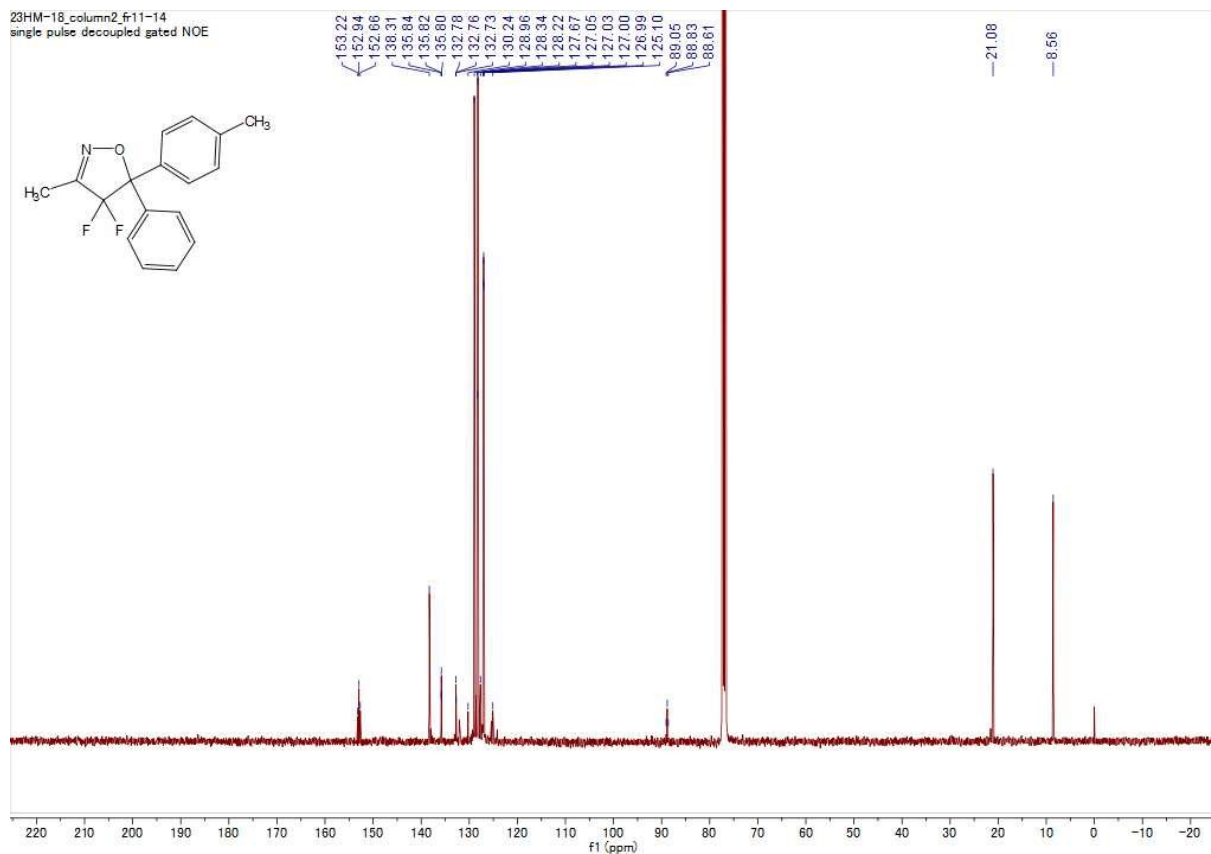

### DEPT135 of 5dB

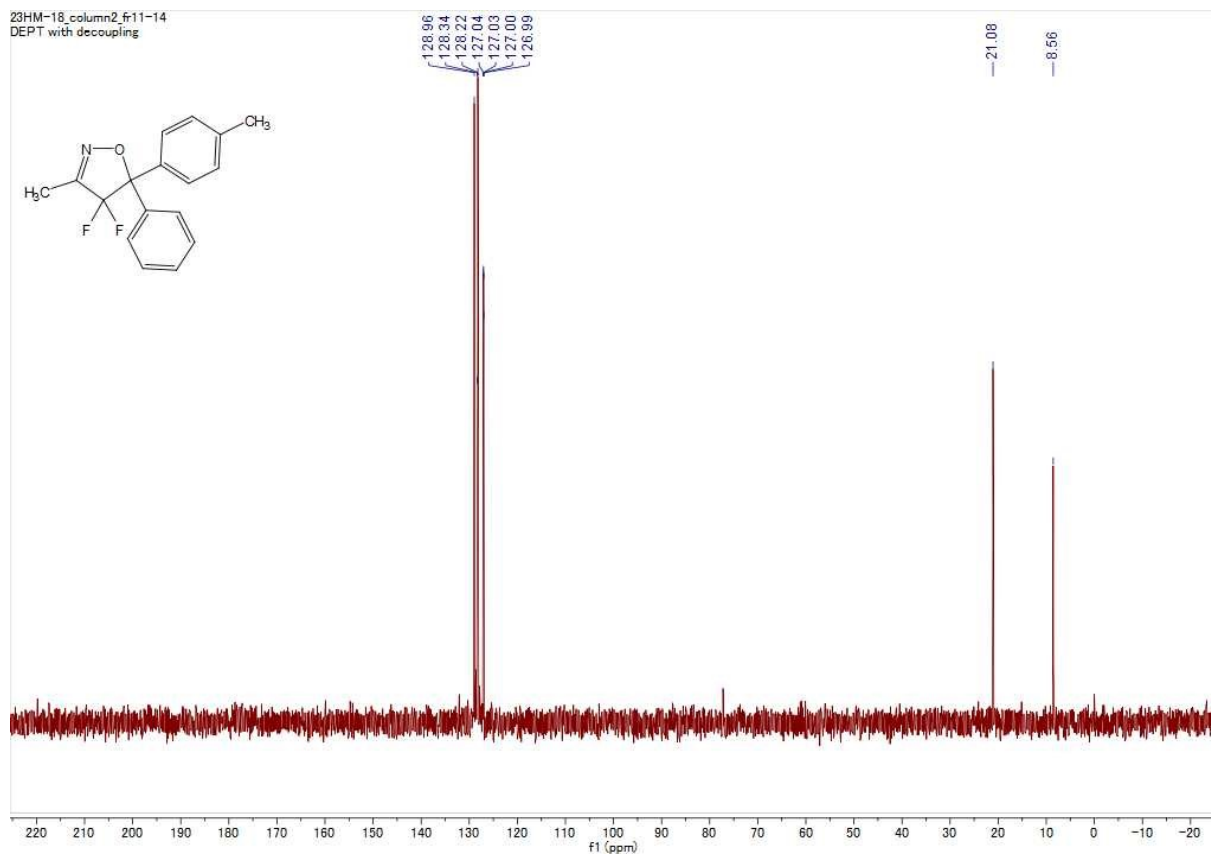

# <sup>1</sup>H NMR of 6

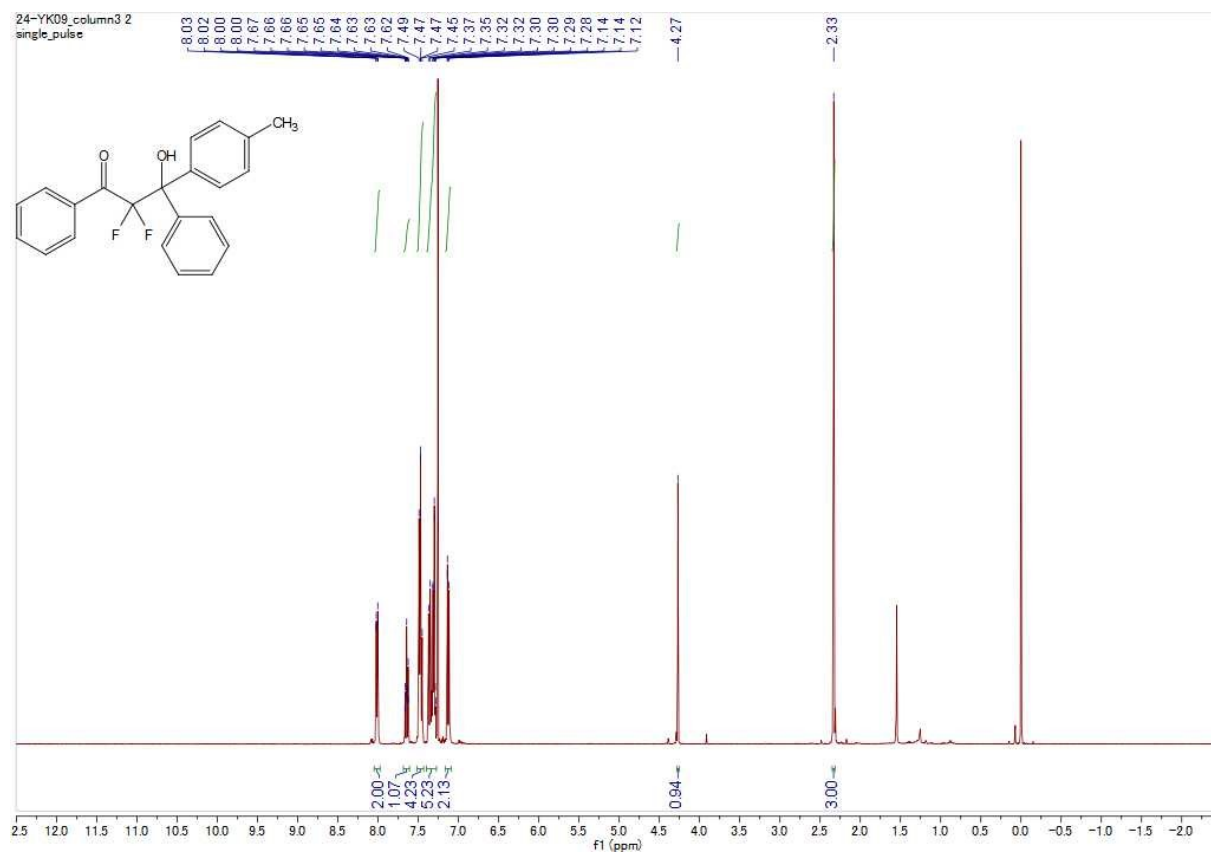

# <sup>19</sup>F NMR of 6

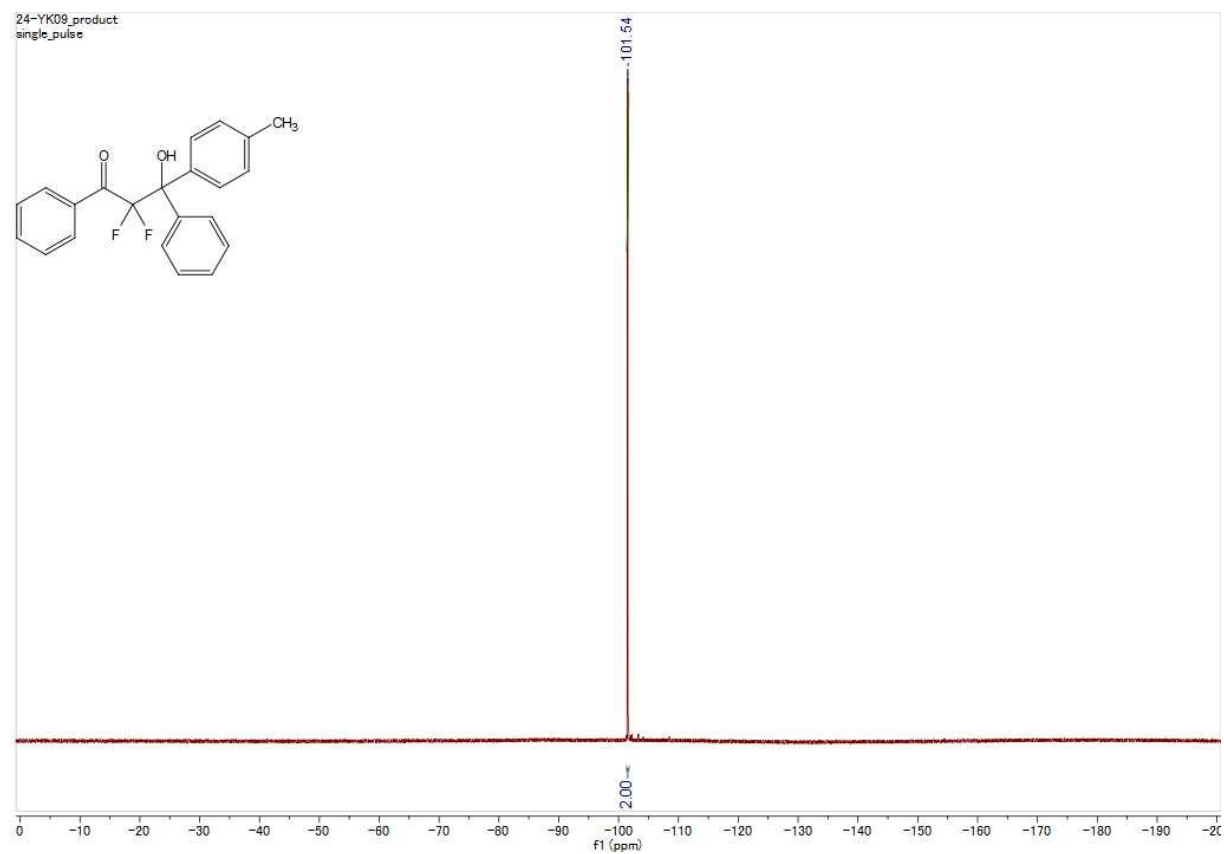

### <sup>13</sup>C NMR of 6

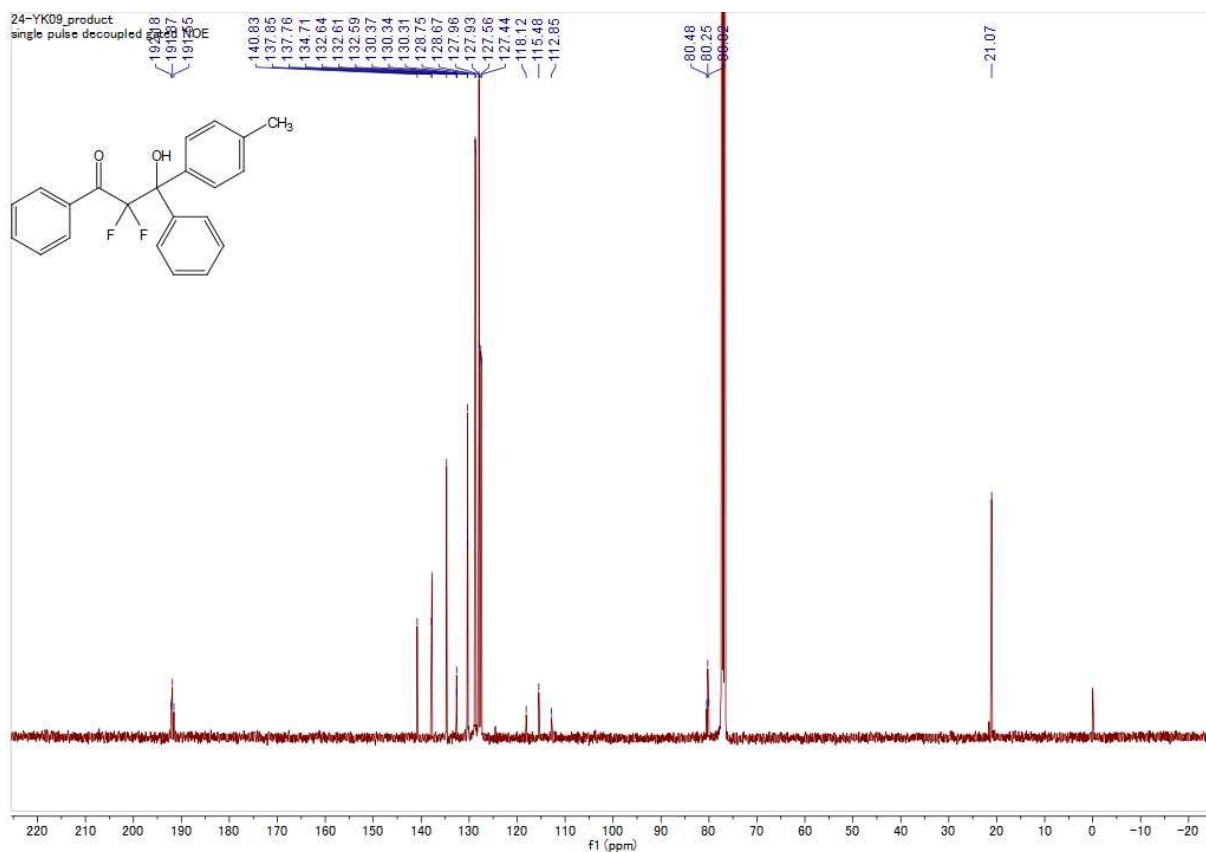

### DEPT135 of 6

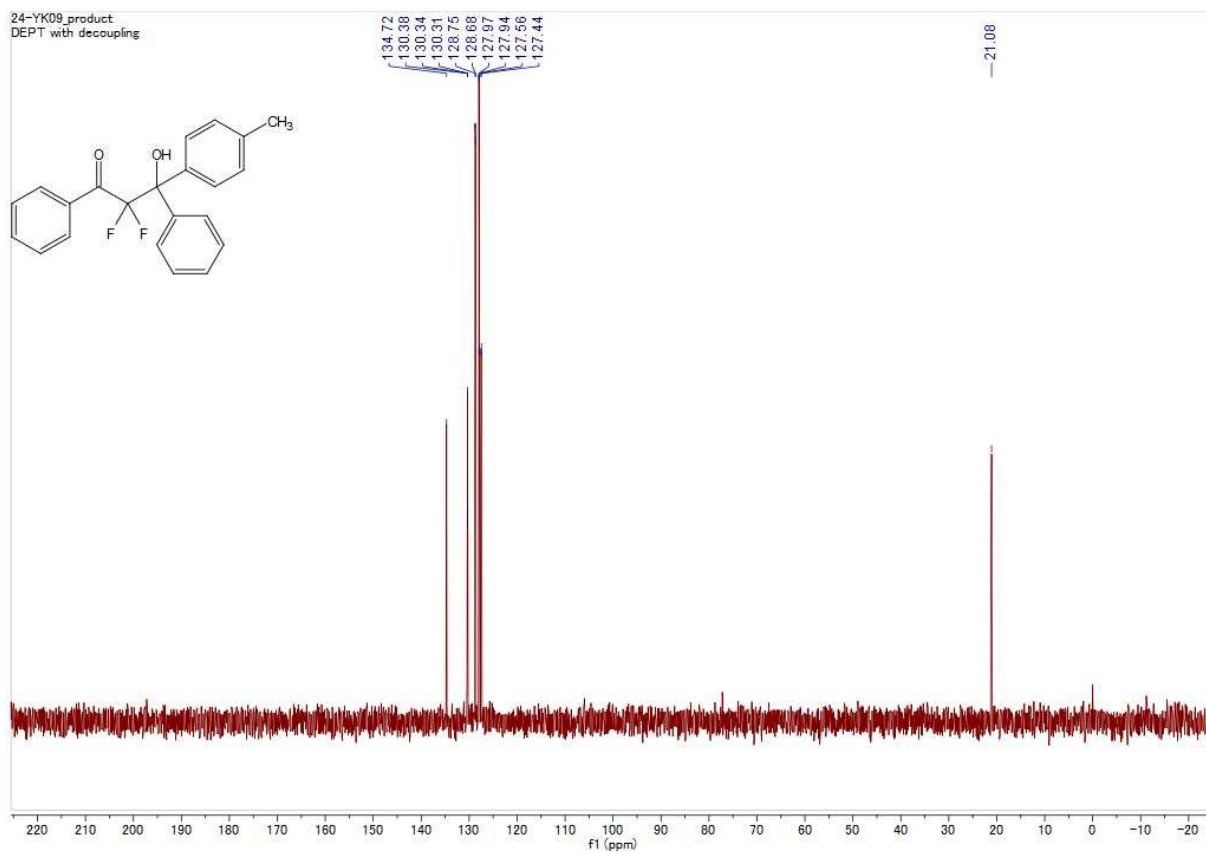

# <sup>1</sup>H NMR of 7

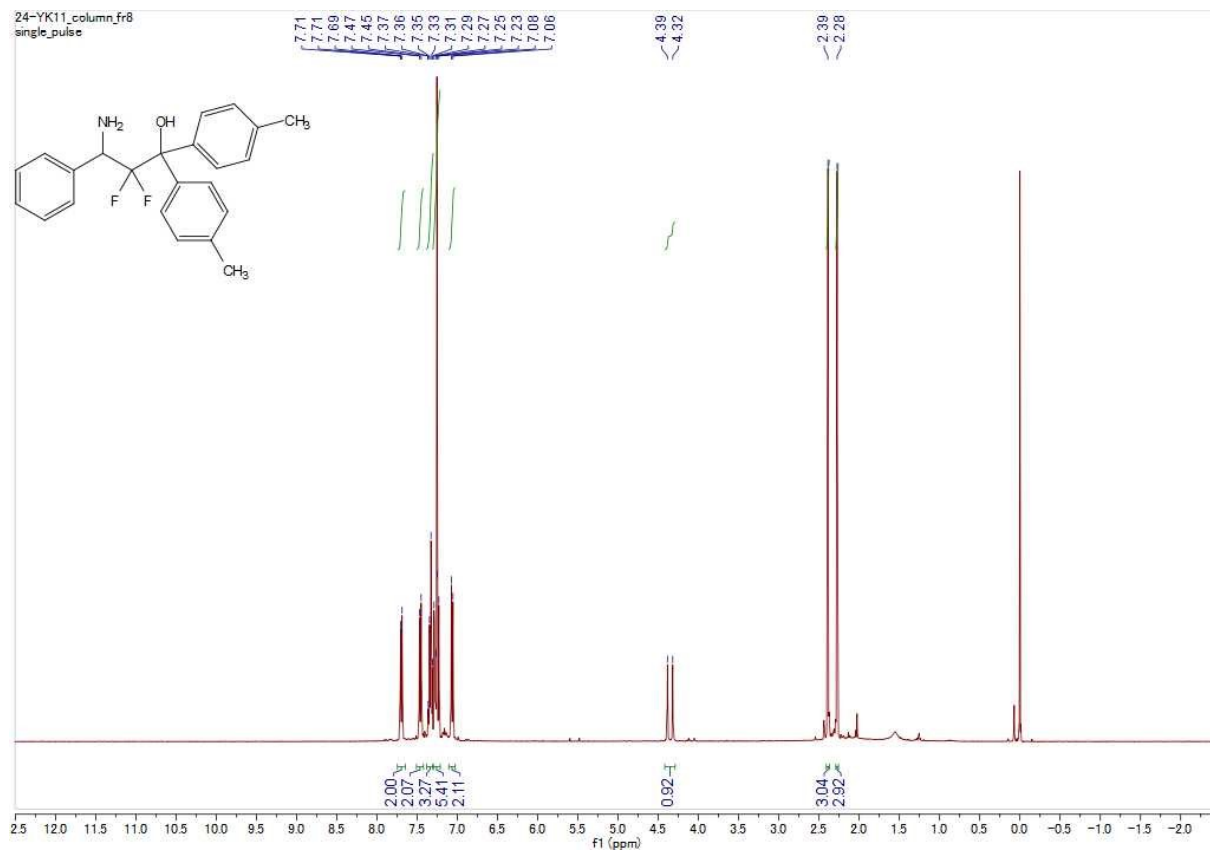

# <sup>19</sup>F NMR of 7

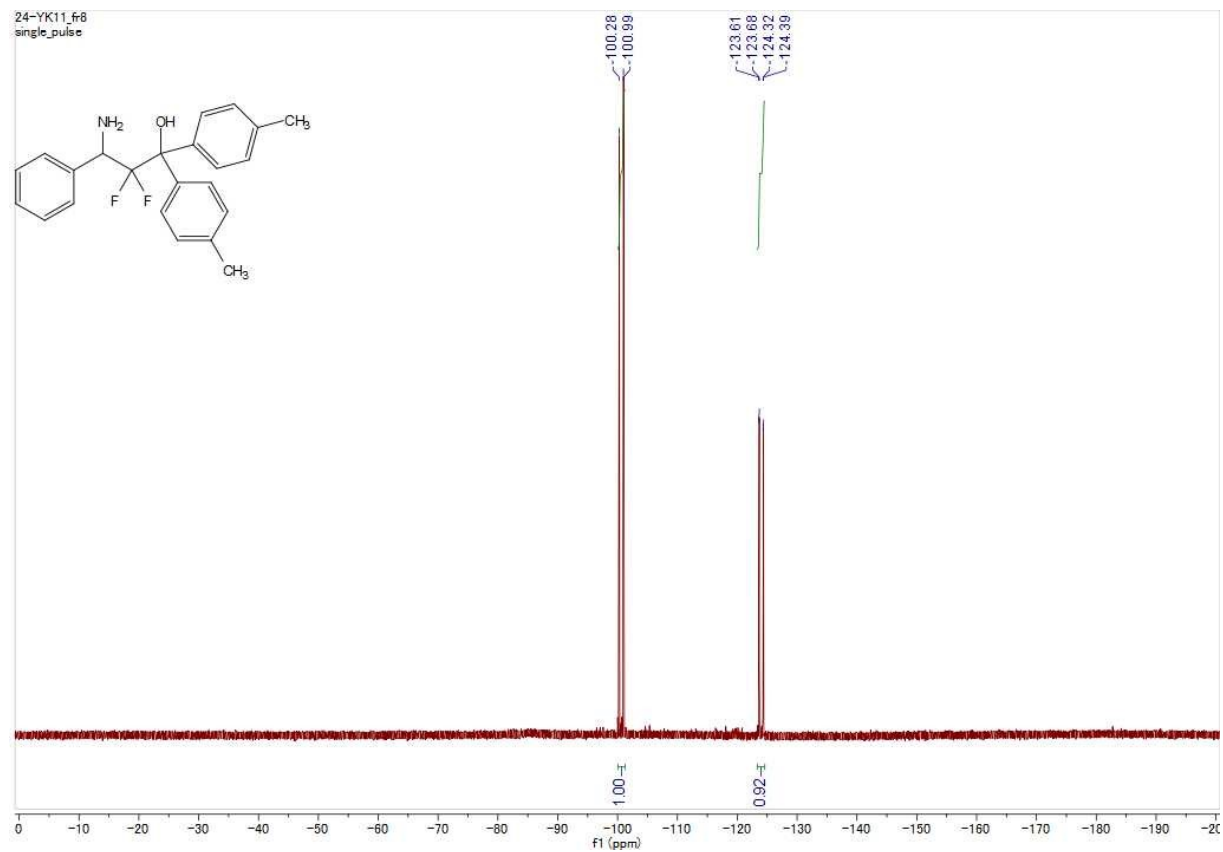

### <sup>13</sup>C NMR of 7

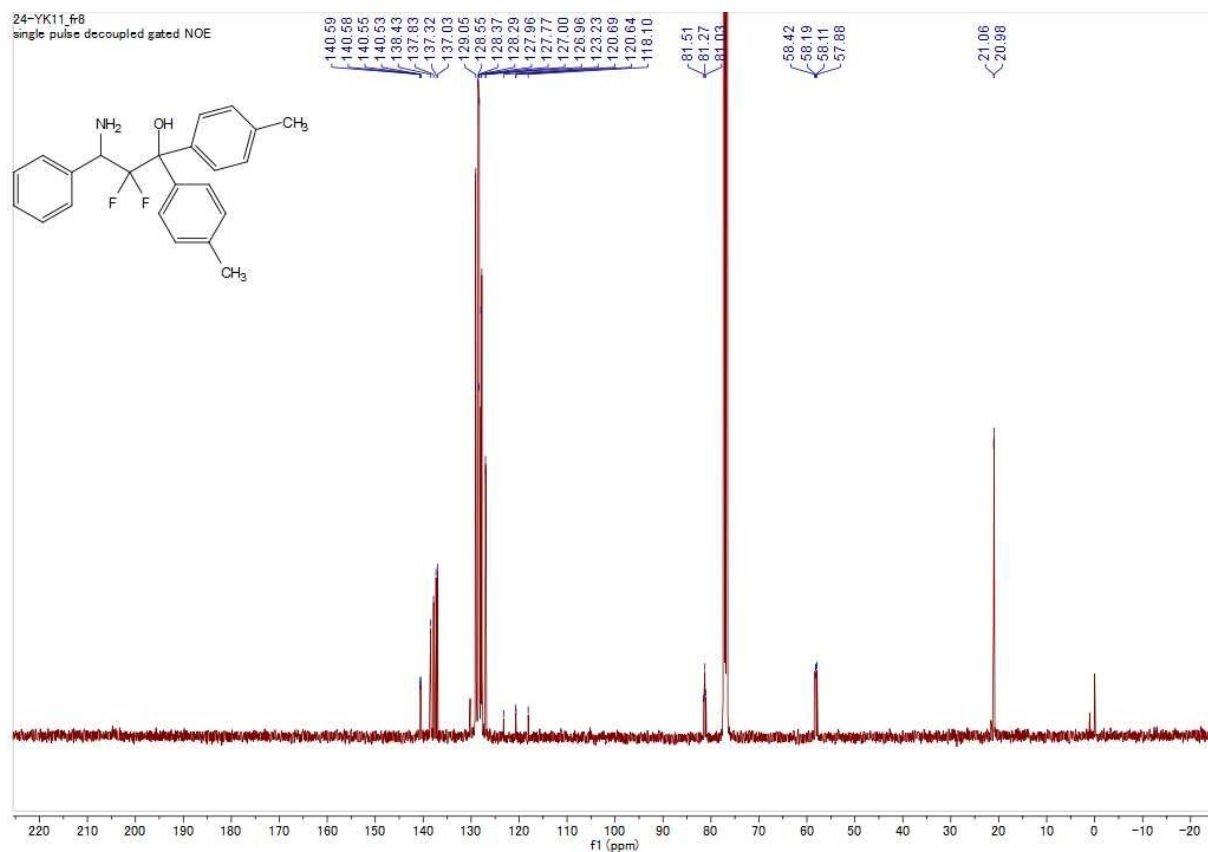

### DEPT135 of 7

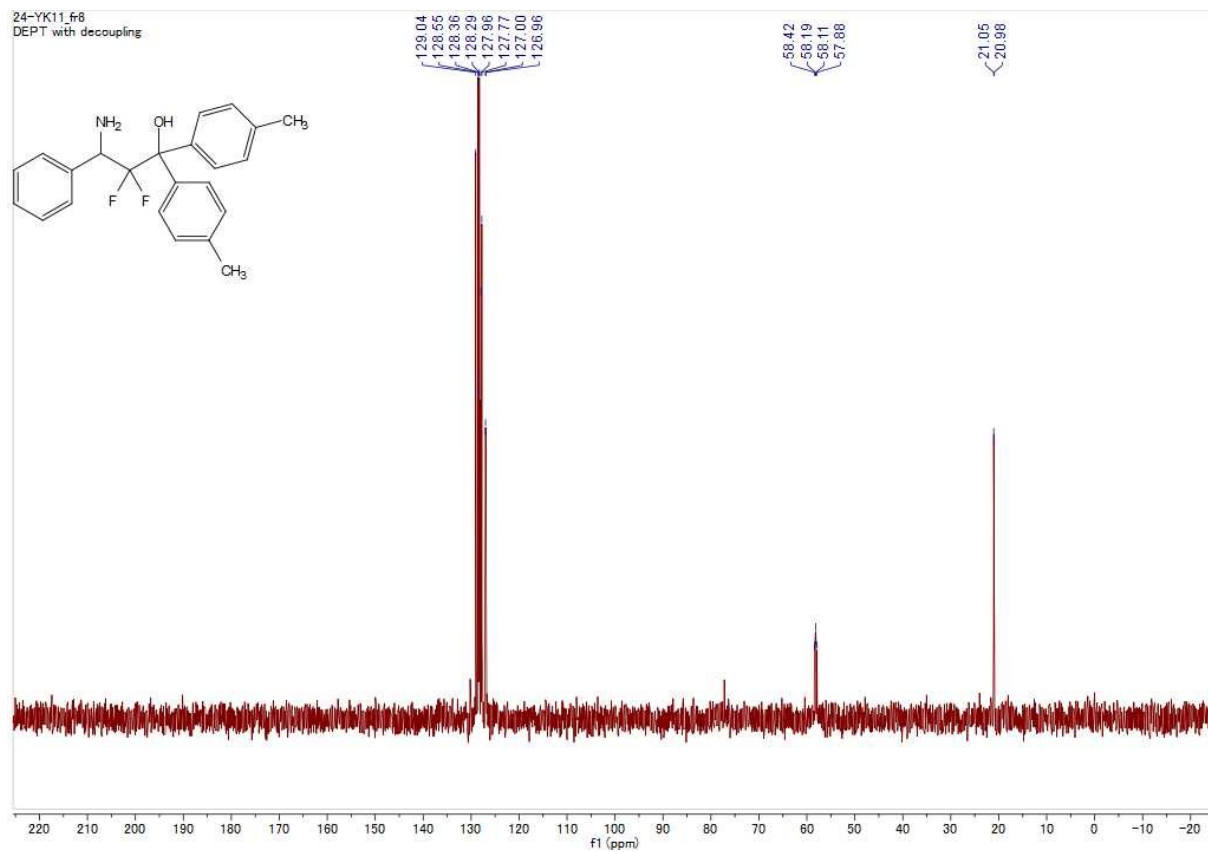

### X-ray crystallographic data:

Crystallographic data for the structure have been deposited with the Cambridge Crystallographic Data Centre as supplementary publication [CCDC: 1440941-1440946](#).

### Experimental of 5aH.

Single colourless block-shaped crystals of **5aH** were obtained from slow evaporation of ethyl acetate and n-hexane at room temperature. A suitable crystal  $0.10 \times 0.08 \times 0.05$  mm<sup>3</sup> was selected and mounted on a MiTeGEN Dual Thickness MicroLoops in perfluoropolyether oil on an XtaLAB Synergy R, HyPix diffractometer. The crystal was kept at a steady  $T = 120.0(4)$  K during data collection. The structure was solved with the ShelXT 2018/2 (Sheldrick, 2018) structure solution program using the Intrinsic Phasing solution method and by using Olex2 (Dolomanov et al., 2009) as the graphical interface. The model was refined with version 2018/3 of ShelXL 2018/3 (Sheldrick, 2015) using Least Squares minimisation.

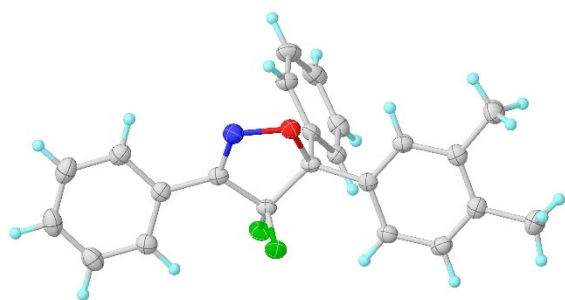

### Crystal Data of 5aH.

$C_{23}H_{19}F_2NO$ ,  $M_r = 363.39$ , monoclinic,  $P2_1/c$  (No. 14),  $a = 17.3894(2)$  Å,  $b = 6.21370(10)$  Å,  $c = 16.7372(2)$  Å,  $\beta = 96.2100(10)^\circ$ ,  $\alpha = \gamma = 90^\circ$ ,  $V = 1797.88(4)$  Å<sup>3</sup>,  $T = 120.0(4)$  K,  $Z = 4$ ,  $Z' = 1$ ,  $\mu(\text{Cu } K\alpha) = 0.791$ , 40254 reflections measured, 3825 unique ( $R_{int} = 0.0373$ ) which were used in all calculations. The final  $wR_2$  was 0.0912 (all data) and  $R_1$  was 0.0379 ( $I > 2(I)$ ).

ORTEP drawing of **5aH** showing thermal ellipsoids at the 50% probability level.

### Compound 5aH

|                              |                                |
|------------------------------|--------------------------------|
| Formula                      | $C_{23}H_{19}F_2NO$            |
| $D_{calc.}/g\text{ cm}^{-3}$ | 1.343                          |
| $\mu/\text{mm}^{-1}$         | 0.791                          |
| Formula Weight               | 363.39                         |
| Colour                       | colourless                     |
| Shape                        | block                          |
| Size/mm <sup>3</sup>         | $0.10 \times 0.08 \times 0.05$ |
| $T/\text{K}$                 | 120.0(4)                       |
| Crystal System               | monoclinic                     |
| Space Group                  | $P2_1/c$                       |
| $a/\text{Å}$                 | 17.3894(2)                     |
| $b/\text{Å}$                 | 6.21370(10)                    |
| $c/\text{Å}$                 | 16.7372(2)                     |
| $\alpha/^\circ$              | 90                             |
| $\beta/^\circ$               | 96.2100(10)                    |
| $\gamma/^\circ$              | 90                             |
| $V/\text{Å}^3$               | 1797.88(4)                     |
| $Z$                          | 4                              |
| $Z'$                         | 1                              |
| Wavelength/Å                 | 1.54184                        |
| Radiation type               | Cu $K\alpha$                   |
| $\Theta_{min}/^\circ$        | 2.556                          |
| $\Theta_{max}/^\circ$        | 78.006                         |
| Measured Refl.               | 40254                          |
| Independent Refl.            | 3825                           |
| Reflections with $I > 2(I)$  | 3612                           |
| $R_{int}$                    | 0.0373                         |
| Parameters                   | 246                            |
| Restraints                   | 0                              |
| Largest Peak                 | 0.256                          |
| Deepest Hole                 | -0.253                         |
| GooF                         | 1.078                          |
| $wR_2$ (all data)            | 0.0912                         |
| $wR_2$                       | 0.0895                         |
| $R_1$ (all data)             | 0.0404                         |
| $R_1$                        | 0.0379                         |

## Experimental of 5aI.

Single colourless block-shaped crystals of **5aI** were obtained from slow evaporation of ethyl acetate and n-hexane at room temperature. A suitable crystal  $0.12 \times 0.08 \times 0.04$  mm<sup>3</sup> was selected and mounted on a MiTeGEN Dual Thickness MicroLoops in perfluoropolyether oil on an XtaLAB Synergy R, HyPix diffractometer. The crystal was kept at a steady  $T = 119.9(5)$  K during data collection. The structure was solved with the ShelXT (Sheldrick, 2015) structure solution program using the Intrinsic Phasing solution method and by using Olex2 (Dolomanov et al., 2009) as the graphical interface. The model was refined with version 2018/3 of ShelXL 2018/3 (Sheldrick, 2015) using Least Squares minimisation.

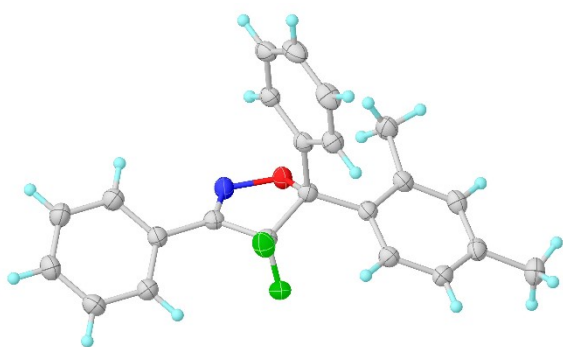

## Crystal Data of 5aI.

$C_{23}H_{19}F_2NO$ ,  $M_r = 363.39$ , monoclinic,  $P2_1/c$  (No. 14),  $a = 13.4568(2)$  Å,  $b = 16.4098(2)$  Å,  $c = 8.25210(10)$  Å,  $\beta = 94.7070(10)^\circ$ ,  $\alpha = \gamma = 90^\circ$ ,  $V = 1816.11(4)$  Å<sup>3</sup>,  $T = 119.9(5)$  K,  $Z = 4$ ,  $Z' = 1$ ,  $\mu(Cu K\alpha) = 0.783$ , 31987 reflections measured, 3869 unique ( $R_{int} = 0.0392$ ) which were used in all calculations. The final  $wR_2$  was 0.1079 (all data) and  $R_1$  was 0.0450 ( $I > 2(I)$ ).

ORTEP drawing of **5aI** showing thermal ellipsoids at the 50% probability level.

## Compound 5aI

|                              |                                |
|------------------------------|--------------------------------|
| Formula                      | $C_{23}H_{19}F_2NO$            |
| $D_{calc.}/g\text{ cm}^{-3}$ | 1.329                          |
| $\mu/\text{mm}^{-1}$         | 0.783                          |
| Formula Weight               | 363.39                         |
| Colour                       | colourless                     |
| Shape                        | block                          |
| Size/mm <sup>3</sup>         | $0.12 \times 0.08 \times 0.04$ |
| $T/\text{K}$                 | 119.9(5)                       |
| Crystal System               | monoclinic                     |
| Space Group                  | $P2_1/c$                       |
| $a/\text{Å}$                 | 13.4568(2)                     |
| $b/\text{Å}$                 | 16.4098(2)                     |
| $c/\text{Å}$                 | 8.25210(10)                    |
| $\alpha/^\circ$              | 90                             |
| $\beta/^\circ$               | 94.7070(10)                    |
| $\gamma/^\circ$              | 90                             |
| $V/\text{Å}^3$               | 1816.11(4)                     |
| $Z$                          | 4                              |
| $Z'$                         | 1                              |
| Wavelength/Å                 | 1.54184                        |
| Radiation type               | Cu $K\alpha$                   |
| $\theta_{min}/^\circ$        | 3.295                          |
| $\theta_{max}/^\circ$        | 77.725                         |
| Measured Refl.               | 31987                          |
| Independent Refl.            | 3869                           |
| Reflections with $I > 2(I)$  | 3677                           |
| $R_{int}$                    | 0.0392                         |
| Parameters                   | 246                            |
| Restraints                   | 0                              |
| Largest Peak                 | 0.409                          |
| Deepest Hole                 | -0.169                         |
| Goof                         | 1.086                          |
| $wR_2$ (all data)            | 0.1079                         |
| $wR_2$                       | 0.1061                         |
| $R_1$ (all data)             | 0.0479                         |
| $R_1$                        | 0.0450                         |

### Experimental of 5aJ.

Single colourless block-shaped crystals of **5aJ** were obtained from slow evaporation of ethyl acetate and n-hexane at room temperature. A suitable crystal  $0.14 \times 0.07 \times 0.04$  mm<sup>3</sup> was selected and mounted on a MiTeGEN Dual Thickness MicroLoops in perfluoropolyether oil on an XtaLAB Synergy R, HyPix diffractometer. The crystal was kept at a steady  $T = 120.0(5)$  K during data collection. The structure was solved with the ShelXT (Sheldrick, 2015) structure solution program using the Intrinsic Phasing solution method and by using Olex2 (Dolomanov et al., 2009) as the graphical interface. The model was refined with version 2018/3 of ShelXL 2018/3 (Sheldrick, 2015) using Least Squares minimisation.

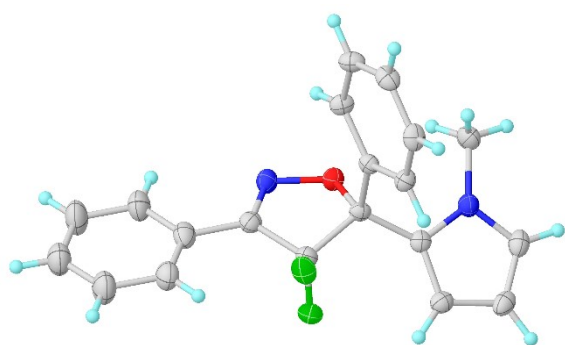

### Crystal Data of 5aJ.

$C_{20}H_{16}F_2N_2O$ ,  $M_r = 338.35$ , triclinic,  $P-1$  (No. 2),  $a = 8.14050(10)$  Å,  $b = 12.07940(10)$  Å,  $c = 17.1421(3)$  Å,  $\alpha = 96.3100(10)^\circ$ ,  $\beta = 97.1640(10)^\circ$ ,  $\gamma = 93.9910(10)^\circ$ ,  $V = 1656.39(4)$  Å<sup>3</sup>,  $T = 120.0(5)$  K,  $Z = 4$ ,  $Z' = 2$ ,  $\mu(\text{Cu K}\alpha) = 0.834$ , 13056 reflections measured, 13056 unique ( $R_{int} = .$ ) which were used in all calculations. The final  $wR_2$  was 0.1394 (all data) and  $R_1$  was 0.0486 ( $I > 2(I)$ ).

ORTEP drawing of **5aJ** showing thermal ellipsoids at the 50% probability level.



**Compound 5aJ**

|                              |                                                                 |
|------------------------------|-----------------------------------------------------------------|
| Formula                      | C <sub>20</sub> H <sub>16</sub> F <sub>2</sub> N <sub>2</sub> O |
| $D_{calc.}/\text{g cm}^{-3}$ | 1.357                                                           |
| $\mu/\text{mm}^{-1}$         | 0.834                                                           |
| Formula Weight               | 338.35                                                          |
| Colour                       | colourless                                                      |
| Shape                        | block                                                           |
| Size/mm <sup>3</sup>         | 0.14×0.07×0.04                                                  |
| $T/\text{K}$                 | 120.0(5)                                                        |
| Crystal System               | triclinic                                                       |
| Space Group                  | <i>P</i> -1                                                     |
| $a/\text{Å}$                 | 8.14050(10)                                                     |
| $b/\text{Å}$                 | 12.07940(10)                                                    |
| $c/\text{Å}$                 | 17.1421(3)                                                      |
| $\alpha/^\circ$              | 96.3100(10)                                                     |
| $\beta/^\circ$               | 97.1640(10)                                                     |
| $\gamma/^\circ$              | 93.9910(10)                                                     |
| $V/\text{Å}^3$               | 1656.39(4)                                                      |

|                             |               |
|-----------------------------|---------------|
| $Z$                         | 4             |
| $Z'$                        | 2             |
| Wavelength/Å                | 1.54184       |
| Radiation type              | Cu K $\alpha$ |
| $\theta_{min}/^\circ$       | 2.617         |
| $\theta_{max}/^\circ$       | 77.956        |
| Measured Refl.              | 13056         |
| Independent Refl.           | 13056         |
| Reflections with $I > 2(I)$ | 11518         |
| $R_{int}$                   | .             |
| Parameters                  | 546           |
| Restraints                  | 169           |
| Largest Peak                | 0.326         |
| Deepest Hole                | -0.316        |
| GooF                        | 1.066         |
| $wR_2$ (all data)           | 0.1394        |
| $wR_2$                      | 0.1357        |
| $R_1$ (all data)            | 0.0547        |
| $R_1$                       | 0.0486        |
